# Supplementary material for: Transcriptomic analysis reveals a WNT signaling pathway-based gene signature prognostic for non-small cell carcinoma
Source: publisher site journal article supplement (doi:10.18632/aging.103724), 2020-10-05
Supplement: Supplementary file [file aging-v12i19-103724-supplementary-material-SD1.pdf]

## SUPPLEMENTARY FIGURES

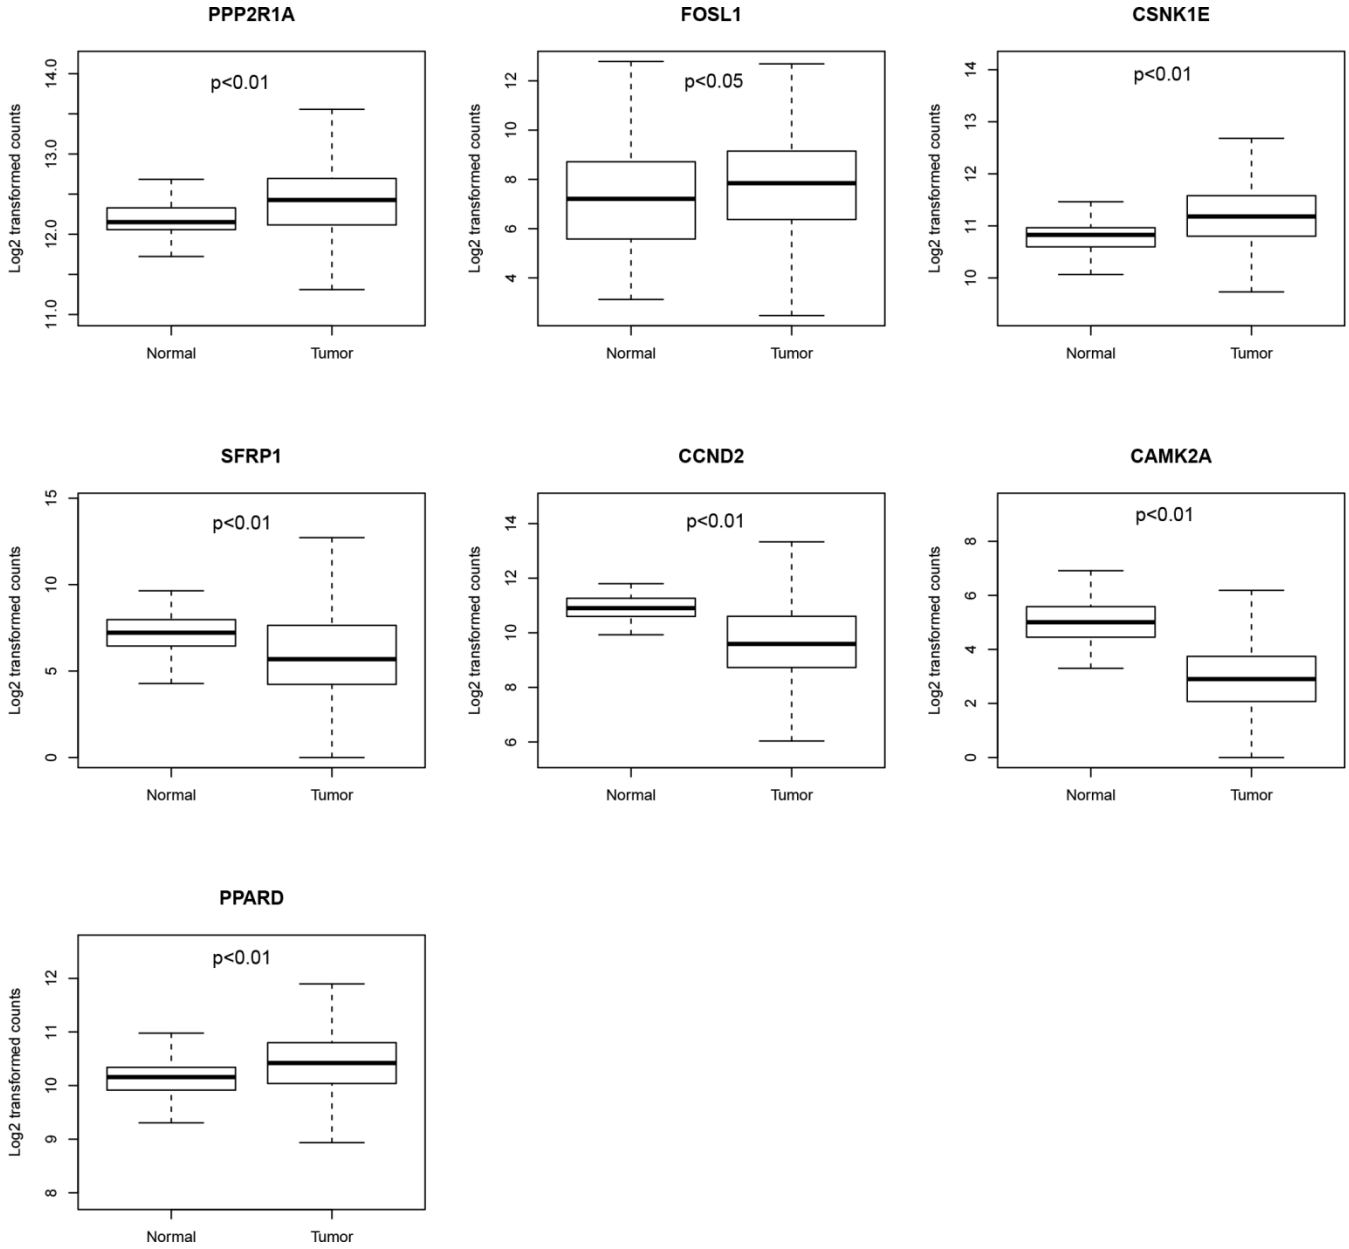

Supplementary Figure 1. Gene expression values of candidate genes in tumor and normal tissues.

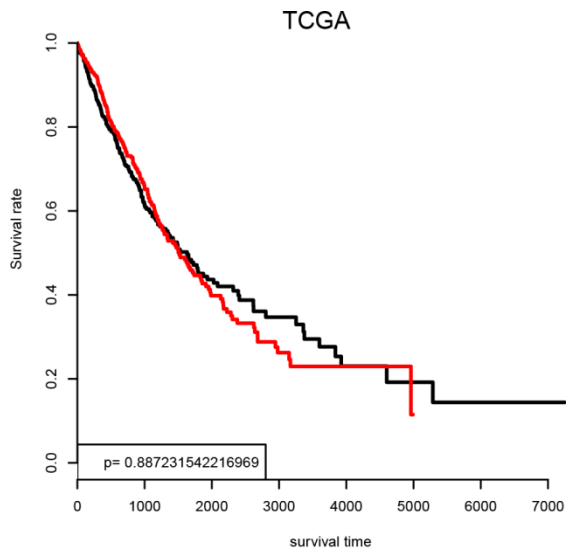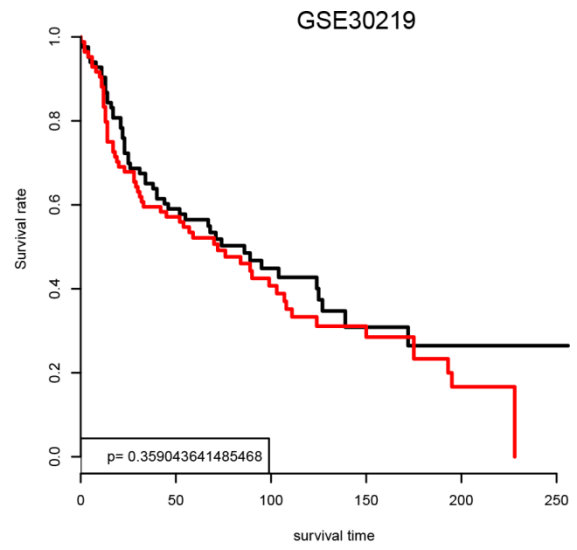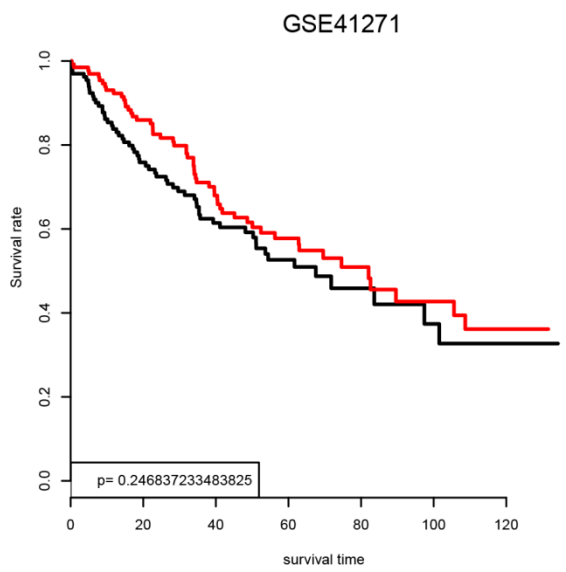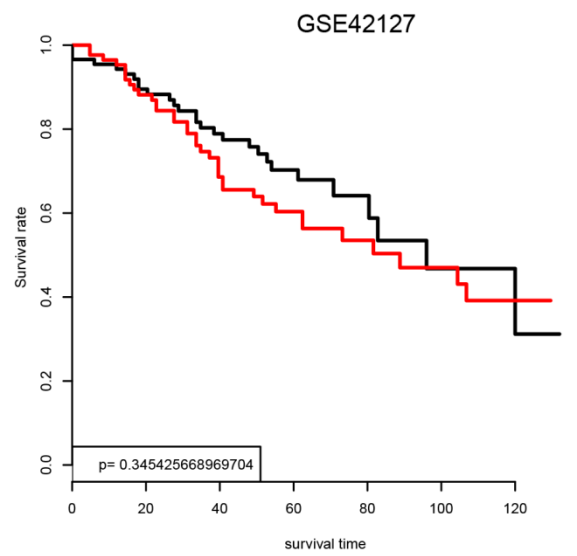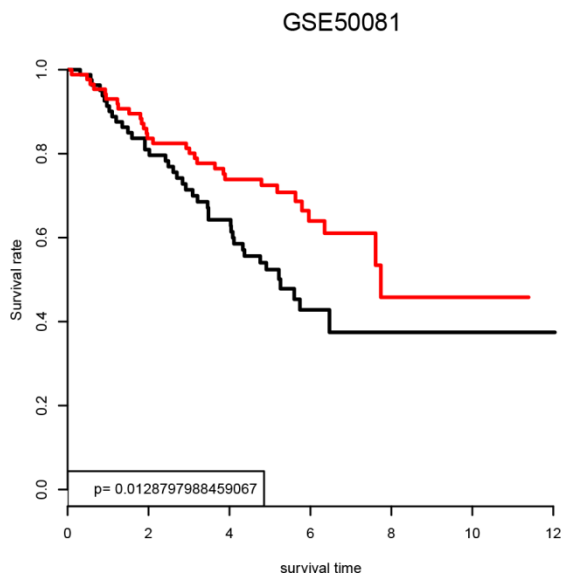

Supplementary Figure 2. Model performance of a four gene model.
