# Supplementary material for: Transcriptomic analysis reveals a WNT signaling pathway-based gene signature prognostic for non-small cell carcinoma
Source: Aging (Albany NY). 2020 Oct 7;12(19):19159–72. doi: 10.18632/aging.103724 (PMC7732286; doi:10.18632/aging.103724)
Supplement: Supplementary Table 1 [file aging-12-103724-s002..xlsx]

## Sheet: data_1__exp_profile
sample	PPARD	PPP2R1A	FOSL1	CCND2	CAMK2A	CSNK1E	SFRP1	OS	OS_IND	riskscore
TCGA.05.4249.01	10.4186	12.8709	4.6337	9.7422	3.5391	10.3873	4.7244	1523	0	3.6524
TCGA.05.4250.01	10.9469	12.0607	10.479	8.7362	3.4526	10.8561	4.8996	121	1	4.13544
TCGA.05.4382.01	11.4477	12.5099	6.6518	10.0058	2.9891	11.0949	2.945	607	0	3.76621
TCGA.05.4384.01	10.726	12.4527	5.6577	8.7761	4.1783	11.1592	4.8011	426	0	4.04681
TCGA.05.4389.01	9.9836	12.275	5.6629	9.1729	1.0048	10.0975	7.0096	1369	0	3.51117
TCGA.05.4390.01	9.8101	12.8373	4.6593	8.2004	2.7545	10.7919	2.2726	1126	0	3.71442
TCGA.05.4395.01	9.2812	12.5834	10.5061	7.8604	2.3296	11.9406	2.671	0	1	4.26156
TCGA.05.4396.01	10.6176	12.1408	4.0146	9.2824	1.7113	10.7658	4.6588	303	1	3.54047
TCGA.05.4397.01	10.0297	11.6968	6.7447	6.6431	5.2768	10.7644	2.7533	731	1	4.17203
TCGA.05.4398.01	10.549	12.1481	8.4586	9.2654	2.6864	10.8907	4.4225	1431	0	3.87333
TCGA.05.4402.01	10.7015	12.5356	5.9495	10.387	2.5424	10.7244	3.8103	244	1	3.56714
TCGA.05.4403.01	10.5903	12.6513	6.6434	8.8935	2.206	10.1171	5.945	578	0	3.71653
TCGA.05.4405.01	10.4551	11.7711	5.8902	9.7916	4.384	11.0246	5.546	610	0	3.88939
TCGA.05.4415.01	9.0288	12.7387	9.5667	8.4061	4.5096	12.9301	6.9294	91	1	4.80075
TCGA.05.4417.01	9.9246	12.3833	6.0541	10.6441	3.1084	10.7931	7.0009	455	0	3.72154
TCGA.05.4418.01	10.0855	13.051	9.6759	9.1881	1.22	11.3122	5.6204	274	1	4.02499
TCGA.05.4420.01	10.4541	11.4854	5.0131	7.3808	2.4516	10.6397	3.7678	912	0	3.75281
TCGA.05.4422.01	10.0754	11.6897	3.9924	9.5095	1.7804	10.7628	4.0198	365	0	3.42426
TCGA.05.4424.01	10.2569	12.954	5.7396	9.1861	2.5277	9.9895	7.82	913	0	3.73894
TCGA.05.4425.01	10.3712	12.1754	5.0882	8.9614	9.4054	10.1561	2.4533	669	0	4.08683
TCGA.05.4426.01	11.1124	12.5009	7.7058	11.2898	2.091	10.6882	6.2478	791	0	3.63065
TCGA.05.4427.01	10.7367	12.0895	7.6532	8.8171	2.0098	11.1803	2.4701	791	0	3.80017
TCGA.05.4430.01	11.5103	12.5183	7.0628	9.3919	3.2649	10.5706	7.3263	761	0	3.98085
TCGA.05.4432.01	10.2075	12.8894	6.1805	10.2675	1.5941	10.7664	5.9031	761	0	3.62738
TCGA.05.4433.01	10.6283	12.3605	6.9169	9.2704	2.3596	10.214	2.3596	730	0	3.52209
TCGA.05.4434.01	10.5738	11.9216	9.7324	9.4335	3.7957	11.7575	12.0061	457	1	4.58418
TCGA.05.5420.01	9.2749	11.8347	5.1297	9.2433	1.8817	9.9672	4.7996	457	0	3.34907
TCGA.05.5423.01	9.3477	11.9276	4.6114	7.9997	2.4318	9.74	4.9214	151	0	3.48731
TCGA.05.5425.01	10.4096	12.3312	7.1709	8.6632	1.7059	10.773	7.8459	882	0	3.94045
TCGA.05.5428.01	8.8635	11.7509	7.9631	6.7814	2.1661	9.5223	1.8544	670	0	3.53973
TCGA.05.5429.01	9.0222	12.5599	8.9451	7.5439	1.3487	10.2886	5.4183	275	1	3.85631
TCGA.05.5715.01	10.5747	12.8051	5.2062	8.6936	2.6928	10.2916	4.975	62	0	3.71999
TCGA.18.3406.01	10.4522	11.9533	9.7745	8.9934	3.1496	10.1104	11.0046	371	1	4.13268
TCGA.18.3407.01	10.4771	12.5705	9.3567	8.8323	3.1063	10.7096	5.6021	136	1	4.05791
TCGA.18.3408.01	8.6231	11.8777	7.9803	11.1739	1.7539	10.7234	7.199	2304	1	3.52255
TCGA.18.3409.01	10.1574	12.839	6.8754	11.7553	3.2806	10.9842	12.6325	3747	0	4.01702
TCGA.18.3410.01	10.3849	12.7177	7.534	9.5503	4.1001	11.0541	4.5516	146	1	4.01089
TCGA.18.3411.01	9.3297	13.3722	9.6525	9.4771	1.3836	10.9822	5.8611	3576	0	3.93181
TCGA.18.3412.01	9.9824	12.1717	9.8301	7.4194	1.743	10.4393	8.5806	345	1	4.15292
TCGA.18.3414.01	10.3164	13.0813	8.2659	8.694	1.6849	11.5573	7.1501	716	1	4.20371
TCGA.18.3415.01	9.958	12.2937	9.6827	8.3378	2.4917	10.6834	4.2418	2803	1	3.95773
TCGA.18.3416.01	9.8008	11.8136	9.6637	9.6951	1.0812	10.582	5.1979	973	1	3.63631
TCGA.18.3417.01	9.3003	13.2313	8.8674	12.1629	3.7717	10.758	6.1996	1097	1	3.73889
TCGA.18.3419.01	9.8626	12.0797	4.3419	9.3708	2.1863	11.0231	4.1898	2811	0	3.59141
TCGA.18.3421.01	9.1451	12.4963	7.246	11.6719	1.4333	10.4431	5.3261	2645	0	3.31098
TCGA.18.4083.01	9.89	12.309	8.1304	12.7527	3.8111	10.611	4.1555	188	1	3.44441
TCGA.18.4086.01	10.5014	12.4488	10.0198	9.7659	3.8544	11.1371	5.8878	85	1	4.15515
TCGA.18.4721.01	9.2572	12.5044	8.7468	12.0295	0.9559	10.5197	10.9246	4694	0	3.59906
TCGA.18.5592.01	10.5797	12.5581	10.1803	8.2625	3.5351	11.2359	6.4523	1519	0	4.3798
TCGA.18.5595.01	10.4351	12.7376	8.4198	7.6709	1.8288	11.0348	9.4153	827	1	4.31101
TCGA.21.1070.01	10.27	12.4411	10.3669	12.4823	3.8043	10.7576	6.4146	3636	0	3.7635
TCGA.21.1071.01	10.0323	11.9989	9.135	8.8282	5.1884	10.4096	5.5713	1426	1	4.09965
TCGA.21.1072.01	9.8734	12.116	10.8776	7.775	2.0726	11.2942	8.09	3016	0	4.36466
TCGA.21.1075.01	9.9911	12.5083	8.1565	10.906	0	11.1844	2.0714	2134	0	3.37068
TCGA.21.1076.01	10.5687	12.0411	7.7461	10.8461	4.01445	11.0572	5.0982	1852	0	3.83452
TCGA.21.1077.01	10.4475	12.2043	9.1612	8.8297	2.7626	11.8582	8.0831	1058	1	4.38163
TCGA.21.1078.01	10.4362	12.9339	7.5719	6.5072	0	11.6363	5.5887	474	1	4.21117
TCGA.21.1079.01	11.7834	12.6268	11.3264	12.1273	3.8328	11.6265	10.9216	965	1	4.36899
TCGA.21.1080.01	10.8106	11.7651	8.8201	7.6231	2.3275	11.2892	4.5049	3724	0	4.13514
TCGA.21.1081.01	11.4721	13.3114	9.8333	8.712	5.0222	11.0729	5.1805	284	1	4.44702
TCGA.21.1082.01	10.5808	12.3513	7.8245	9.1238	3.6748	11.5886	8.0752	3644	0	4.31674
TCGA.21.1083.01	9.3928	12.3167	6.9866	8.9389	2.7071	11.4618	5.5537	1315	1	3.9981
TCGA.21.5782.01	11.2766	13.2956	9.3252	10.0383	5.3336	11.9225	7.6184	962	1	4.60401
TCGA.21.5783.01	10.5324	13.0742	8.9174	11.0784	4.0344	11.259	10.9488	2680	1	4.29107
TCGA.21.5784.01	10.2092	13.0157	9.559	8.9758	1.8695	11.0039	5.8373	1268	0	4.04433
TCGA.21.5786.01	10.5679	13.6931	8.6154	13.5001	2.675	11.6507	5.1971	1032	0	3.72054
TCGA.21.5787.01	10.8695	13.188	9.2499	10.6429	2.5239	12.1325	10.8225	329	1	4.44736
TCGA.21.A5DI.01	10.3454	12.6643	10.2961	11.6697	4.4485	11.9709	3.4225	979	0	4.08377
TCGA.22.0940.01	9.592	12.8835	9.3146	9.7056	4.5508	10.6249	10.202	669	1	4.2799
TCGA.22.0944.01	11.4951	12.5998	12.2736	11.9866	2.0631	11.97	7.4711	223	1	4.16653
TCGA.22.1000.01	10.9295	12.3952	8.3427	10.4375	5.2551	11.1024	7.6518	454	1	4.2121
TCGA.22.1002.01	10.3947	12.4232	8.7524	10.2448	3.5611	11.3643	9.7979	131	1	4.2466
TCGA.22.1005.01	10.426	12.0331	7.2375	10.9744	3.3421	11.4717	6.5299	1953	1	3.89401
TCGA.22.1011.01	11.0614	12.5695	7.4384	10.4055	2.435	11.4424	8.1921	53	1	4.03667
TCGA.22.1012.01	10.0476	11.741	10.407	10.6472	3.8435	11.4224	2.1173	429	1	3.86938
TCGA.22.1016.01	10.8264	12.4953	8.8475	12.0327	3.8798	11.3417	9.2809	822	1	4.0583
TCGA.22.1017.01	10.6589	12.6228	8.8168	9.6988	1.7283	11.1991	3.8185	1485	1	3.83913
TCGA.22.4591.01	10.2741	12.6	5.8661	11.9792	0.6898	10.6006	9.0027	623	1	3.41146
TCGA.22.4593.01	10.63	12.9993	9.1772	8.6037	3.607	11.4141	3.8124	1067	1	4.24688
TCGA.22.4594.01	9.7826	12.1841	5.3958	9.0285	2.9182	11.1697	7.5757	1470	1	3.96182
TCGA.22.4595.01	10.4075	13.0161	6.7684	9.2218	4.0086	11.2208	6.0823	734	1	4.14549
TCGA.22.4596.01	10.2717	12.0754	8.0003	9.9024	3.9679	10.8847	6.1543	17	1	3.95825
TCGA.22.4599.01	9.6024	13.102	7.6228	11.0733	3.3545	11.131	5.8461	1161	1	3.84313
TCGA.22.4601.01	10.7185	12.5543	8.2912	10.3977	2.8264	11.6091	8.1857	1057	1	4.14068
TCGA.22.4604.01	10.4946	12.4026	8.8042	11.9346	3.3068	11.4413	8.9651	399	1	4.00083
TCGA.22.4605.01	10.8009	12.5107	9.8596	9.2547	3.4688	11.4656	5.1115	974	1	4.23166
TCGA.22.4607.01	10.6381	12.5103	8.4583	9.8968	1.9934	11.1086	5.5031	587	1	3.87268
TCGA.22.4609.01	10.5378	12.5706	9.4923	11.8464	3.1374	10.909	5.589	291	1	3.75243
TCGA.22.4613.01	10.0575	12.2708	7.8356	11.189	1.8698	10.9798	8.5588	358	1	3.74786
TCGA.22.5471.01	9.9929	12.6937	10.077	12.0837	2.4109	11.0361	6.8776	1845	0	3.76678
TCGA.22.5472.01	10.5374	12.647	8.824	10.258	2.0455	11.3464	6.6696	1975	1	3.97415
TCGA.22.5473.01	10.1951	12.9681	9.6198	9.6482	1.9541	11.509	6.0755	1933	1	4.10202
TCGA.22.5474.01	9.8114	12.5907	7.9502	9.7119	1.9006	10.7148	9.8288	445	1	3.95127
TCGA.22.5477.01	9.7081	12.8008	7.9838	13.8596	1.4955	12.3101	8.5308	1346	1	3.74492
TCGA.22.5478.01	10.2607	13.003	8.1061	12.6837	2.0561	11.0754	6.2383	24	1	3.57749
TCGA.22.5479.01	9.7921	12.7922	10.1588	13.1245	2.1862	11.4314	6.0305	2625	1	3.67673
TCGA.22.5480.01	9.8208	12.595	6.5015	12.5143	3.668	12.0035	13.4985	2170	1	4.19413
TCGA.22.5481.01	9.4795	12.5587	4.9361	11.0888	3.0342	12.0426	1.8231	2409	1	3.64433
TCGA.22.5482.01	11.5035	12.8214	10.8105	8.8365	4.454	11.8573	3.2372	357	1	4.48001
TCGA.22.5483.01	9.7305	12.9965	6.5209	8.6988	2.461	11.151	7.0039	573	1	4.05037
TCGA.22.5485.01	10.4262	13.8927	9.9333	8.4864	1.7152	9.9811	1.7152	916	1	3.74369
TCGA.22.5489.01	10.0739	12.8675	8.0019	12.801	4.0494	11.025	12.9865	1912	1	4.04485
TCGA.22.5491.01	9.843	12.5384	9.3663	11.6586	0.3703	10.7738	6.7484	1713	1	3.50358
TCGA.22.5492.01	9.9061	12.5003	7.1251	11.2657	0.3346	10.3528	7.7864	506	1	3.38457
TCGA.22.A5C4.01	10.4977	12.9859	7.9825	7.6847	0	11.5964	7.5412	671	0	4.18316
TCGA.33.4532.01	9.3578	12.5285	7.5202	7.6763	1.6641	10.7545	2.9084	3924	1	3.79732
TCGA.33.4533.01	10.2019	13.1668	8.5884	12.1342	3.7339	11.5297	13.567	4068	0	4.30649
TCGA.33.4538.01	10.203	12.004	9.7403	11.0829	1.9268	11.5708	6.5771	2979	1	3.88942
TCGA.33.4547.01	9.8406	12.3032	8.7125	11.626	3.0167	11.2363	6.2715	2419	0	3.78797
TCGA.33.4566.01	9.5872	12.6905	8.9061	11.0761	3.9231	11.5247	2.0131	5287	1	3.82987
TCGA.33.4582.01	9.0401	13.1227	6.338	9.8843	1.6032	11.6365	5.4795	3149	1	3.8401
TCGA.33.4583.01	11.0556	12.5423	11.6462	9.0814	0.9674	9.9894	4.0255	4601	1	3.71612
TCGA.33.4586.01	9.8536	13.0543	9.4862	10.7739	2.3792	11.4401	3.5243	428	1	3.84883
TCGA.33.4587.01	10.1447	13.0572	3.998	7.487	2.0736	11.4793	11.3758	1656	1	4.35122
TCGA.33.4589.01	10.2901	12.7859	11.3457	8.8103	2.3825	10.8574	8.5245	47	1	4.28353
TCGA.33.6737.01	10.3106	13.5731	10.5449	9.078	2.7768	12.2126	4.3727	601	1	4.43552
TCGA.33.6738.01	10.4236	13.155	7.0075	8.3825	1.9232	11.1924	10.1391	1927	0	4.27106
TCGA.33.A4WN.01	10.9112	12.4524	7.9853	8.1054	3.2928	11.3689	6.382	143	1	4.2992
TCGA.33.A5GW.01	10.6944	12.6056	8.6212	7.2057	2.771	10.5073	6.3418	9	1	4.18691
TCGA.33.AAS8.01	10.3378	12.801	9.7102	10.7074	3.0115	11.4681	1.6814	1114	1	3.84193
TCGA.33.AASB.01	10.1529	12.6216	10.5437	9.1419	1.5889	12.8233	0	211	1	4.15981
TCGA.33.AASD.01	10.4522	12.7144	11.8418	7.1248	6.5519	11.7133	1.2298	3376	1	4.74669
TCGA.33.AASI.01	10.08	12.7709	8.9293	9.7128	0.6681	13.0702	4.9002	1344	1	4.2342
TCGA.33.AASJ.01	10.2578	12.0882	10.7266	7.7684	2.4275	11.6931	5.5163	3600	1	4.37361
TCGA.33.AASL.01	10.9075	12.387	9.9549	11.5926	0.6957	11.5686	8.3253	826	1	3.87262
TCGA.34.2596.01	9.6187	12.9192	8.2083	9.5102	2.6882	11.5909	11.1458	80	1	4.35679
TCGA.34.2600.01	10.3562	13.4659	5.0744	11.1251	1.7874	12.0498	3.8566	1874	1	3.74802
TCGA.34.2608.01	10.1881	12.8131	7.9514	10.4771	4.7307	11.4043	7.0946	1000	1	4.18754
TCGA.34.5231.01	10.5139	12.7471	9.9132	14.7415	1.1409	11.3237	5.2061	1984	1	3.33188
TCGA.34.5232.01	10.3085	12.494	9.9756	10.4129	2.0886	11.2075	5.0201	2471	0	3.8799
TCGA.34.5234.01	9.2332	12.1548	8.333	9.5755	2.0949	10.6042	7.443	2271	0	3.79891
TCGA.34.5236.01	10.9856	12.4593	9.7673	9.7097	4.6765	11.3306	3.165	276	1	4.15941
TCGA.34.5239.01	10.1299	12.6868	7.1601	10.6513	3.2084	11.3369	6.5111	1834	0	3.92666
TCGA.34.5240.01	8.9713	12.3034	7.4239	7.3097	1.2945	11.6817	10.3722	1541	0	4.35726
TCGA.34.5241.01	9.7125	12.4762	8.3295	11.8885	3.5211	11.2757	5.6692	515	1	3.77281
TCGA.34.5927.01	10.1413	11.9256	7.5844	11.9767	2.0001	12.1758	6.6401	1361	0	3.8181
TCGA.34.5928.01	10.8927	13.125	9.0754	10.6774	4.6007	11.6554	11.7192	1196	0	4.55312
TCGA.34.5929.01	10.5155	13.0749	8.0985	11.9743	0.8501	12.0128	6.7189	151	1	3.81629
TCGA.34.7107.01	10.7981	12.3339	9.0943	12.5108	2.7937	10.8767	9.0767	34	1	3.77525
TCGA.34.8454.01	11.1913	13.149	9.4989	10.0887	3.7427	11.1017	4.2291	1180	0	4.07844
TCGA.34.8455.01	10.2259	12.3432	10.4226	9.7083	2.6492	11.6742	4.9635	123	1	4.1326
TCGA.34.8456.01	10.3261	12.9168	7.7901	13.0311	2.426	11.5169	5.9341	804	0	3.64018
TCGA.34.A5IX.01	11.2434	12.9876	9.2372	8.0004	3.151	12.5043	5.8264	1031	0	4.66657
TCGA.35.3615.01	9.7736	12.5359	5.4873	8.2714	2.2924	10.9485	4.334	14	0	3.81654
TCGA.35.4122.01	10.6805	12.0844	9.148	8.9874	2.8136	9.4939	3.466	225	0	3.57174
TCGA.35.4123.01	10.9908	12.3475	10.1906	8.9307	2.308	10.3736	2.4306	182	0	3.77971
TCGA.35.5375.01	9.2081	12.792	7.2262	7.8776	2.9372	9.8156	5.4321	264	0	3.79212
TCGA.37.3783.01	9.9037	12.0287	11.0552	8.5001	2.353	10.4418	11.0872	122	0	4.2493
TCGA.37.3789.01	10.941	12.4974	11.1443	10.6692	5.8752	11.512	10.8271	13	0	4.64713
TCGA.37.3792.01	10.2567	12.4024	10.0588	8.6193	1.7227	10.5114	5.7423	12	0	3.92596
TCGA.37.4129.01	9.1232	12.8112	4.1326	11.5018	3.5592	10.9621	9.1148	242	0	3.70972
TCGA.37.4130.01	8.5094	12.219	4.0378	9.4166	0.6933	9.7504	3.8653	247	0	3.06434
TCGA.37.4132.01	9.2932	12.5466	6.5298	8.5848	2.0429	10.6127	3.1008	227	0	3.64689
TCGA.37.4133.01	9.4406	12.1056	7.3745	7.5191	1.4594	10.391	9.3253	238	0	3.98691
TCGA.37.4135.01	8.6262	12.2722	4.8432	7.0409	0.6066	11.0043	11.3838	207	0	4.06572
TCGA.37.4141.01	11.5035	12.2474	7.0711	8.2646	2.6136	10.4569	5.9325	12	0	3.93771
TCGA.37.5819.01	9.1297	13.8904	4.9829	9.3876	2.1384	11.3149	2.6537	103	0	3.73456
TCGA.37.A5EL.01	9.6491	11.3351	11.4131	11.1443	2.5854	11.5725	8.2531	1143	1	4.02986
TCGA.37.A5EM.01	11.0208	11.8188	9.3751	9.1205	5.4883	11.8503	4.3976	867	0	4.41875
TCGA.37.A5EN.01	9.3242	11.8997	8.1742	10.3806	2.4021	11.8038	10.6473	660	0	4.14982
TCGA.38.4625.01	9.8141	11.9843	10.8481	8.1078	3.2401	10.4784	12.6471	2973	0	4.44703
TCGA.38.4626.01	10.6188	12.1669	8.2972	10.4192	3.9938	10.5756	7.156	3674	0	3.91108
TCGA.38.4627.01	9.6834	12.4204	7.0281	10.0804	3.7446	10.5176	8.5907	1147	1	3.90334
TCGA.38.4628.01	9.8282	12.6143	5.5686	7.4048	3.154	9.3125	3.8031	1492	1	3.59639
TCGA.38.4629.01	11.3713	12.5643	11.052	9.2006	2.5452	10.5924	8.1587	864	1	4.18248
TCGA.38.4630.01	10.1932	11.956	4.5743	7.3583	3.5128	12.3103	11.4537	1073	1	4.6409
TCGA.38.4631.01	8.7145	12.6628	8.2098	7.1993	1.3615	11.0711	4.4198	354	1	3.99605
TCGA.38.4632.01	10.5034	11.9986	8.3688	8.1687	3.6404	10.4133	2.2701	1357	1	3.85499
TCGA.38.6178.01	10.5268	12.3063	7.5858	8.9687	3.834	10.9343	7.273	448	0	4.1357
TCGA.38.7271.01	10.1069	12.4668	7.0233	10.6603	3.7979	10.3772	7.04	800	1	3.74978
TCGA.38.A44F.01	9.6836	12.361	7.5475	10.5843	3.9855	11.3388	6.3684	133	0	3.97307
TCGA.39.5011.01	9.8836	12.5134	8.3372	9.0144	2.0162	10.0836	1.5376	4053	0	3.50204
TCGA.39.5016.01	9.2609	11.9467	8.6307	9.0002	1.2801	10.5992	7.7715	3850	0	3.80619
TCGA.39.5019.01	10.0467	12.7162	8.7263	12.1827	2.456	12.0007	10.5629	3387	0	4.1082
TCGA.39.5021.01	9.8339	12.7455	7.8992	10.9002	2.6248	11.6256	5.4041	2086	1	3.88638
TCGA.39.5022.01	10.1939	12.6991	7.0022	11.1215	2.6249	11.2219	10.3516	1679	1	3.9732
TCGA.39.5024.01	10.6862	12.6998	8.731	8.5545	3.1644	10.8587	9.9672	2510	0	4.33656
TCGA.39.5027.01	10.2292	13.0303	9.4937	13.0223	1.483	11.5938	7.1969	3108	0	3.72569
TCGA.39.5028.01	10.8624	12.4815	9.3724	11.8387	6.0816	10.9711	11.6408	52	1	4.34112
TCGA.39.5029.01	9.7847	12.9631	9.4073	9.6319	3.9072	11.2241	6.8646	740	1	4.22763
TCGA.39.5030.01	10.5217	12.5985	7.3781	11.3414	3.2687	11.4651	11.9018	59	1	4.16571
TCGA.39.5031.01	10.0518	12.9798	9.3454	12.3928	2.6751	11.0928	10.5003	1841	1	3.93635
TCGA.39.5034.01	9.692	13.4355	6.4875	9.1486	2.3776	11.2705	8.2005	1107	1	4.10998
TCGA.39.5035.01	10.1156	12.7381	8.6631	9.2061	1.8972	10.733	3.7585	2080	0	3.7786
TCGA.39.5036.01	9.9621	12.5285	10.0242	7.4374	1.3706	10.7636	4.0294	2165	0	4.00863
TCGA.39.5037.01	8.8686	12.4702	9.6728	10.3647	1.6257	11.346	3.4611	1690	0	3.71988
TCGA.39.5039.01	9.7894	13.0167	9.228	8.9453	3.5532	11.6594	7.2288	544	1	4.39589
TCGA.39.5040.01	10.0443	13.4164	6.8443	8.1389	5.5902	11.5698	12.7193	519	1	4.8574
TCGA.43.2576.01	10.5225	12.9197	7.0986	10.1374	3.0652	11.3979	6.0852	1223	0	4.00279
TCGA.43.2578.01	10.8465	12.6879	6.8351	8.3889	3.0993	10.9584	9.5632	684	1	4.26477
TCGA.43.2581.01	10.3997	12.5652	7.8586	8.9541	2.4113	10.2736	3.7654	1176	0	3.70402
TCGA.43.3394.01	9.9084	11.8403	8.1306	11.9194	3.2333	11.3548	6.7024	1190	1	3.75631
TCGA.43.3920.01	9.3626	12.4462	7.422	11.14	3.4668	10.5142	11.3956	1007	0	3.89508
TCGA.43.5668.01	10.4934	13.4542	4.6888	9.6316	2.5228	10.8342	3.1978	559	1	3.65882
TCGA.43.5670.01	10.8359	12.8681	8.4268	9.2031	3.5554	12.0808	6.0264	849	0	4.39836
TCGA.43.6143.01	9.8942	13.2514	7.4801	7.9942	1.8744	11.9089	9.5144	699	0	4.46383
TCGA.43.6647.01	11.3055	13.0371	8.7709	11.2564	5.4614	11.5724	6.8433	757	0	4.29744
TCGA.43.6770.01	10.37	12.1324	8.8784	13.0622	3.8642	12.0182	7.9459	653	0	3.97949
TCGA.43.6771.01	12.6173	12.6227	11.8353	7.3531	5.307	11.3346	3.7836	166	1	4.72314
TCGA.43.6773.01	10.2414	12.6931	9.5163	10.6414	2.5681	11.252	5.9875	116	1	3.94622
TCGA.43.7656.01	10.0215	12.8928	6.1911	9.8845	3.0638	11.4544	3.9019	596	0	3.86954
TCGA.43.7657.01	9.9871	11.5014	7.3956	8.2989	2.2138	11.5821	7.2527	236	0	4.11887
TCGA.43.7658.01	8.9495	12.7205	4.1211	8.6026	2.2522	11.6013	8.8853	2378	1	4.0653
TCGA.43.8115.01	10.5873	12.6096	6.8371	9.931	3.8024	11.2109	7.9298	407	0	4.10569
TCGA.43.8116.01	9.9588	12.8037	6.8549	9.4331	2.5069	11.9049	5.0014	358	0	4.05781
TCGA.43.8118.01	9.8248	12.2877	9.05	10.7717	3.1443	11.7778	2.8066	89	1	3.87715
TCGA.43.A474.01	10.0236	12.2139	9.7576	12.7637	3.0107	11.8736	2.581	353	0	3.67325
TCGA.43.A475.01	10.0889	12.3	6.8505	9.9488	3.0083	11.259	6.264	296	0	3.91184
TCGA.43.A56U.01	10.3222	12.2008	8.8667	10.5821	4.3567	12.17	5.2749	432	0	4.23342
TCGA.43.A56V.01	9.6044	12.772	9.4126	12.3847	3.0387	11.5449	5.3098	366	0	3.78988
TCGA.44.2655.01	9.4979	11.949	7.3725	9.449	2.7983	11.1446	5.9569	1324	0	3.88124
TCGA.44.2656.01	10.4852	11.8887	7.9343	9.5734	1.7819	10.2587	4.9324	1429	0	3.5742
TCGA.44.2657.01	10.2516	12.1899	5.3902	10.0816	2.8156	10.661	6.9521	1351	0	3.69236
TCGA.44.2659.01	10.8221	12.339	5.9188	9.9261	3.8483	10.3801	5.046	1367	0	3.70974
TCGA.44.2661.01	10.072	12.13	4.8981	9.44	3.4068	10.4173	7.0405	1159	0	3.73337
TCGA.44.2662.01	11.0567	11.5189	8.4335	8.4763	2.8999	10.4928	3.7235	1280	0	3.82566
TCGA.44.2665.01	10.3111	11.5551	7.21	10.8087	3.6305	10.9754	5.8203	1301	0	3.73979
TCGA.44.2666.01	10.5264	12.5141	7.1788	8.5511	4.7017	10.9356	7.7562	97	1	4.28837
TCGA.44.2668.01	10.8921	11.9253	10.8769	9.3323	3.4364	10.9109	4.8771	761	1	4.07993
TCGA.44.3396.01	10.7001	12.1761	7.8878	9.3717	3.1057	11.0451	4.2058	1130	0	3.90588
TCGA.44.3398.01	10.693	11.9888	5.9893	10.385	4.0743	10.7958	7.3054	1163	0	3.85447
TCGA.44.3918.01	10.2462	11.7709	6.6788	9.8718	3.5458	10.3157	10.2705	1036	0	3.89566
TCGA.44.3919.01	10.5251	12.0818	5.2258	10.0292	3.2899	10.2327	3.8737	1026	1	3.48247
TCGA.44.4112.01	10.3569	12.2351	7.061	8.132	2.8925	10.2535	6.0889	808	1	3.88794
TCGA.44.5643.01	9.6221	12.9213	7.0473	12.2932	1.4277	10.6899	4.7504	1013	0	3.31271
TCGA.44.5644.01	9.6056	11.7787	5.7952	7.633	2.6599	10.8572	5.6876	863	0	3.91661
TCGA.44.5645.01	9.6128	11.9875	4.0929	11.6639	3.4267	10.3043	8.6614	852	0	3.44636
TCGA.44.6145.01	10.7613	12.3464	6.6824	9.7684	2.2601	11.1	7.2949	595	0	3.90114
TCGA.44.6146.01	10.0989	12.2137	8.3201	8.3936	2.0562	10.5235	4.1817	728	0	3.79965
TCGA.44.6147.01	10.1601	12.3238	6.4304	10.1894	3.8191	10.6674	8.0375	845	0	3.88774
TCGA.44.6148.01	10.004	12.3967	3.8472	11.9644	5.4369	10.8984	11.112	704	0	3.89971
TCGA.44.6774.01	10.6299	12.2753	8.2256	10.3579	3.7095	10.8752	8.7463	658	0	4.04847
TCGA.44.6775.01	10.8624	11.8682	7.3535	10.0547	3.472	10.67	5.2988	705	0	3.77501
TCGA.44.6776.01	10.0672	13.1679	4.4952	8.5041	2.1991	11.054	5.9389	2616	0	3.90069
TCGA.44.6777.01	10.6586	12.0394	6.1166	10.5745	3.5262	10.2381	5.6109	987	1	3.57247
TCGA.44.6778.01	9.7495	12.1791	4.8852	10.5209	3.7066	10.7858	5.6398	1864	0	3.63931
TCGA.44.6779.01	10.8098	12.4622	10.1044	9.4262	2.0662	11.4263	4.6386	500	1	4.05621
TCGA.44.7659.01	10.0366	12.2164	5.8899	9.0215	1.9962	10.8661	2.9498	691	0	3.61439
TCGA.44.7660.01	9.6264	12.7131	6.7804	8.2864	3.6753	11.4226	8.1858	592	0	4.32115
TCGA.44.7661.01	11.5889	12.2192	10.6626	9.7568	4.3479	11.2066	6.0971	557	1	4.28861
TCGA.44.7662.01	11.4728	12.3029	9.7862	9.6247	4.5901	11.3716	4.1595	218	0	4.22906
TCGA.44.7667.01	9.6505	13.3723	5.3906	8.2045	0.4146	11.5859	4.7172	1097	0	3.88287
TCGA.44.7669.01	9.4479	12.4075	6.7264	9.2823	2.2266	10.9687	5.0926	574	1	3.76783
TCGA.44.7670.01	10.6909	12.6598	10.4568	11.169	1.6617	11.569	11.0894	882	0	4.18961
TCGA.44.7671.01	10.4702	12.5284	7.303	9.8643	2.2573	11.0233	6.9638	889	0	3.88889
TCGA.44.7672.01	11.016	12.4951	7.7663	10.4933	3.3745	10.9023	4.939	719	0	3.83169
TCGA.44.8117.01	10.5605	11.8362	7.3604	8.1974	2.4157	12.3779	2.5641	385	0	4.16077
TCGA.44.8119.01	10.1805	11.9414	6.0666	9.207	4.0913	11.8217	8.9132	285	0	4.30184
TCGA.44.8120.01	11.2316	12.5608	6.5384	9.0912	2.9501	11.0961	7.3834	260	0	4.082
TCGA.44.A479.01	10.3311	11.9993	4.1259	10.1462	3.6265	11.1532	5.7182	486	0	3.74048
TCGA.44.A47A.01	10.3889	12.5162	5.6027	9.7682	2.3489	10.7843	4.076	466	0	3.61898
TCGA.44.A47B.01	9.7586	12.9101	6.3897	8.5191	1.6956	11.0133	4.8685	287	0	3.84973
TCGA.44.A47G.01	10.6485	12.1432	8.3234	9.8765	4.1907	10.8381	3.3513	351	0	3.87087
TCGA.44.A4SS.01	10.7078	12.8155	8.7303	9.0986	3.8372	10.3894	5.1432	415	0	3.9935
TCGA.44.A4SU.01	11.1158	12.4056	6.4495	9.5214	3.3105	11.2991	6.4802	409	1	4.04483
TCGA.46.3765.01	9.8786	12.6477	9.4884	10.5262	2.1727	11.9373	5.3254	405	0	4.03415
TCGA.46.3766.01	9.7889	12.5082	7.1932	10.6	4.4739	10.6202	5.7649	370	0	3.81378
TCGA.46.3767.01	10.3234	12.4384	7.2284	11.4826	4.4105	10.9568	9.9439	388	0	4.00666
TCGA.46.3768.01	9.3545	13.0041	7.4831	7.3424	2.3884	10.8122	7.8044	299	1	4.19918
TCGA.46.3769.01	9.9621	12.5693	9.5922	8.2182	4.3244	11.0566	5.6639	135	0	4.32154
TCGA.46.6025.01	10.8776	13.3034	11.3294	7.6871	4.7285	11.4779	2.0111	324	0	4.53375
TCGA.46.6026.01	10.7832	12.867	5.1294	13.0848	3.3013	12.1315	6.39	423	0	3.76615
TCGA.49.4486.01	9.6605	12.968	6.8166	10.3321	2.1127	10.9051	2.4995	2318	1	3.54843
TCGA.49.4487.01	11.0114	12.4315	5.6641	10.3472	2.3819	11.3493	8.83	855	1	3.94455
TCGA.49.4488.01	10.5664	12.0214	7.822	7.8589	4.2181	9.7565	1.9764	869	1	3.75139
TCGA.49.4490.01	11.6147	12.5977	7.4598	8.9161	3.9979	11.7078	6.5056	385	1	4.37007
TCGA.49.4494.01	10.3086	12.948	7.8971	8.1901	1.4349	10.6828	3.162	1081	1	3.80471
TCGA.49.4501.01	9.9275	12.3173	6.2284	9.2644	2.8231	9.9252	6.8204	1421	1	3.64837
TCGA.49.4505.01	10.6017	12.1055	9.3087	9.966	2.3014	10.4114	4.4065	428	1	3.67847
TCGA.49.4506.01	9.3132	12.7213	8.6686	8.8832	1.7603	12.2811	4.1141	999	1	4.15806
TCGA.49.4507.01	10.7855	12.0966	8.8946	10.0692	3.508	11.8482	5.5225	268	1	4.16401
TCGA.49.4510.01	10.2237	12.5534	5.9085	8.3657	3.4031	11.3516	6.1803	896	1	4.13825
TCGA.49.4512.01	10.926	12.6287	7.8792	9.7188	3.7332	11.0453	4.2233	905	1	3.97106
TCGA.49.4514.01	10.7637	12.4917	8.648	9.7702	1.3393	11.1192	5.0166	1700	0	3.81904
TCGA.49.6743.01	10.926	12.2538	5.8022	8.7268	2.6839	11.2932	5.4004	1621	0	3.9743
TCGA.49.6744.01	10.4733	12.2496	6.2738	10.1314	3.7247	10.3588	7.573	1683	0	3.78828
TCGA.49.6745.01	11.3625	12.1363	9.2336	9.6098	2.3019	11.0353	5.6759	522	0	3.96533
TCGA.49.6761.01	11.3401	12.4471	9.9633	9.4881	4.9572	11.1293	6.4875	354	0	4.35211
TCGA.49.6767.01	11.036	12.4492	10.999	8.8141	1.4725	10.9835	14.4293	677	0	4.50577
TCGA.49.AAQV.01	11.171	11.6864	8.1519	8.8595	2.2042	11.1062	4.2511	677	1	3.89261
TCGA.49.AAR0.01	10.4224	12.5995	5.9653	9.4946	3.6326	11.4477	4.5733	4765	0	3.98197
TCGA.49.AAR2.01	10.5067	13.1655	6.6437	9.3333	2.5728	10.9687	5.8248	2224	0	3.93597
TCGA.49.AAR3.01	11.1324	12.3677	11.687	10.3699	4.3337	11.5395	4.5095	1893	0	4.25927
TCGA.49.AAR4.01	11.0918	12.5048	8.4577	10.3123	4.7469	11.4327	3.0987	879	1	4.0566
TCGA.49.AAR9.01	10.0902	13.009	9.5249	7.4045	3.472	10.6842	9.2097	260	1	4.46609
TCGA.49.AARE.01	10.6356	12.9238	6.8371	9.1408	3.2005	11.4968	3.0501	1229	1	4.00201
TCGA.49.AARN.01	10.7015	12.4447	7.6131	9.7742	0.8043	11.1516	5.8694	1135	1	3.75976
TCGA.49.AARO.01	11.8886	12.3296	9.9981	10.268	3.9461	11.8156	4.2816	3759	0	4.2345
TCGA.49.AARQ.01	11.3972	12.3091	7.2963	8.2994	2.458	11.2761	1.4251	6732	0	3.90505
TCGA.49.AARR.01	10.2996	12.2743	7.7122	10.3891	4.157	11.1701	8.4763	4992	0	4.10356
TCGA.4B.A93V.01	9.2241	12.7916	8.8753	8.8195	1.9585	11.8396	3.1206	300	1	4.04195
TCGA.50.5044.01	11.0314	12.9265	10.7495	10.1499	3.7315	11.9481	5.9399	624	1	4.39452
TCGA.50.5045.01	10.4203	12.5205	8.0381	9.8577	2.7912	10.857	6.2615	2174	1	3.8991
TCGA.50.5049.01	9.8048	12.7129	5.1309	9.9912	1.6925	10.5122	6.0628	3094	0	3.53166
TCGA.50.5051.01	9.8762	12.2775	6.3497	9.0626	2.8473	11.462	9.664	478	1	4.18431
TCGA.50.5055.01	10.1107	12.392	7.7831	10.7896	4.0687	10.6448	5.5952	1830	1	3.78427
TCGA.50.5066.01	8.9737	12.1491	9.571	8.3939	2.6384	10.172	5.5861	1442	0	3.84813
TCGA.50.5068.01	8.4647	11.993	6.0441	8.4717	1.834	9.8011	6.9949	1499	1	3.53145
TCGA.50.5072.01	9.8217	12.3044	9.0707	8.9587	2.8083	11.9004	7.3375	250	1	4.32073
TCGA.50.5930.01	10.7455	12.4665	5.7223	9.2665	3.1648	11.2948	3.6952	282	1	3.87633
TCGA.50.5931.01	9.8742	12.6764	7.3397	9.6432	2.9899	12.5041	11.7168	434	1	4.56229
TCGA.50.5932.01	10.8423	11.9702	5.183	8.321	1.4128	10.904	7.6415	1235	1	3.86342
TCGA.50.5933.01	11.7519	11.9982	10.5091	9.2436	2.9323	10.6138	3.9816	2393	1	3.95291
TCGA.50.5935.01	10.141	12.1756	3.9075	9.1488	2.881	10.3024	8.4322	653	1	3.71774
TCGA.50.5939.01	10.5915	11.9935	10.9529	9.7043	2.5333	13.0319	4.5592	460	1	4.4404
TCGA.50.5941.01	11.4149	12.2763	8.2057	10.0225	2.759	10.1444	3.9167	1474	0	3.61987
TCGA.50.5942.01	10.1298	12.1096	3.0058	8.8355	3.4892	10.4273	6.1433	1847	0	3.67768
TCGA.50.5944.01	10.3771	12.2042	6.1148	9.1393	2.9464	10.5191	5.1355	1750	0	3.73812
TCGA.50.5946.01	10.4724	12.1659	6.1192	8.5841	1.3831	10.9762	6.001	1617	0	3.81321
TCGA.50.6590.01	10.1509	12.5269	10.7262	10.3782	2.9111	10.6657	7.0442	1288	1	3.96454
TCGA.50.6591.01	10.644	12.8496	4.9757	6.1354	1.4814	11.5934	10.2501	119	1	4.48457
TCGA.50.6592.01	10.1256	13.2481	8.6159	9.4873	2.279	10.1654	3.4951	777	1	3.6726
TCGA.50.6593.01	10.8068	12.2974	9.3144	9.5035	3.01	10.5991	5.7267	336	1	3.93602
TCGA.50.6594.01	11.1556	11.7185	8.267	8.3688	1.9324	9.5319	2.7298	370	1	3.48214
TCGA.50.6595.01	11.0437	12.8844	10.8923	9.7431	3.3224	11.137	4.8078	189	1	4.15954
TCGA.50.6597.01	10.7356	12.5837	5.6975	9.8335	5.6442	9.8513	3.6218	1268	1	3.69705
TCGA.50.6673.01	10.4954	12.7709	7.2887	8.9614	3.797	10.7977	9.2908	22	1	4.2233
TCGA.50.7109.01	9.9045	12.5317	4.6321	10.7634	3.6546	10.6311	5.6561	308	1	3.59282
TCGA.50.8457.01	10.1698	12.2193	6.6436	9.3183	3.5965	10.9364	6.4666	1125	0	3.96172
TCGA.50.8460.01	10.3077	12.6515	5.5689	10.6237	2.0349	10.9385	4.0435	829	0	3.5279
TCGA.51.4079.01	10.8672	12.6149	10.4009	9.1877	2.2058	10.7664	5.8879	12	1	4.03198
TCGA.51.4080.01	9.3351	12.6099	7.4765	11.6619	0	11.3296	8.4229	12	1	3.57362
TCGA.51.4081.01	10.0458	12.1129	9.3103	10.8468	4.4511	11.7649	6.9102	911	0	4.19674
TCGA.51.6867.01	10.1323	12.444	8.3036	8.8379	1.9264	10.6428	9.7638	1856	1	4.05809
TCGA.52.7622.01	10.2768	12.3275	10.4929	10.7004	3.7441	11.2006	4.4627	862	0	3.98049
TCGA.52.7809.01	9.7098	11.9594	6.6896	9.3348	2.706	11.8488	9.1638	166	1	4.18909
TCGA.52.7810.01	10.2773	12.8802	10.6997	7.7513	3.04	12.6819	6.7221	923	0	4.79632
TCGA.52.7811.01	10.8791	13.1821	10.3971	9.4615	3.249	10.9404	4.0279	266	1	4.09457
TCGA.52.7812.01	9.8757	12.6748	9.9162	8.9195	2.321	10.1272	3.5099	835	1	3.74274
TCGA.53.7624.01	10.3657	13.4135	7.8498	8.2376	1.862	11.1658	10.6304	1043	1	4.36284
TCGA.53.7626.01	10.0491	12.5013	6.9828	9.8154	4.5878	10.8807	6.4745	929	1	4.01682
TCGA.53.7813.01	9.1082	12.0948	4.43	10.1163	0	10.9827	4.037	424	0	3.25385
TCGA.53.A4EZ.01	10.6494	12.8216	4.4235	8.268	1.9084	10.9816	3.4892	1071	0	3.75578
TCGA.55.1592.01	10.7621	12.1749	5.1665	8.6964	2.853	10.8011	4.9179	701	1	3.80612
TCGA.55.1594.01	9.4174	12.7242	7.1227	8.2162	2.4125	11.5481	2.7858	1178	0	3.98501
TCGA.55.1595.01	10.0892	12.0337	3.8811	9.3788	3.7563	11.0815	5.6301	1479	0	3.80417
TCGA.55.1596.01	10.5377	11.8901	4.8194	7.9536	1.9856	10.908	3.8696	2065	0	3.7378
TCGA.55.5899.01	8.9836	12.5061	7.9767	8.5846	2.3221	10.6593	4.3527	930	0	3.80207
TCGA.55.6543.01	10.5555	12.0965	8.054	9.9656	2.8342	10.5853	3.4638	435	0	3.65724
TCGA.55.6642.01	10.0946	11.9254	4.658	10.7012	3.5217	10.821	7.9237	2449	0	3.7031
TCGA.55.6712.01	12.0573	12.207	10.9467	9.5058	2.1969	11.3163	4.3728	171	1	4.09344
TCGA.55.6968.01	8.994	12.2792	4.2718	9.9057	1.1008	11.2435	9.6665	1293	1	3.72497
TCGA.55.6969.01	9.934	12.4303	5.191	10.3107	3.6303	11.2647	8.6504	1239	0	3.96582
TCGA.55.6970.01	10.7321	12.0978	6.3165	9.3765	1.8359	11.147	8.083	464	1	3.91835
TCGA.55.6971.01	10.0682	11.9797	6.1237	10.8065	3.6573	10.783	5.9539	1400	0	3.67407
TCGA.55.6972.01	9.378	11.9805	4.5748	7.1783	0	11.481	1.7151	1632	1	3.6236
TCGA.55.6975.01	10.374	12.4859	8.3046	11.0504	2.376	11.1705	5.3948	118	1	3.75693
TCGA.55.6978.01	11.6193	12.1081	9.6038	10.0777	3.9458	10.3738	7.4601	176	1	4.01838
TCGA.55.6979.01	10.8025	11.825	6.4189	10.375	3.1295	10.6888	4.422	237	1	3.6122
TCGA.55.6980.01	10.4131	12.3944	7.2329	10.282	4.4152	10.6758	5.3184	2109	0	3.85718
TCGA.55.6981.01	10.502	12.2159	7.4773	9.1151	2.836	11.3785	4.6255	1379	1	3.9867
TCGA.55.6982.01	10.8186	12.4523	8.9809	9.7624	3.4778	10.532	3.4778	995	1	3.81806
TCGA.55.6984.01	10.6567	12.4168	9.5553	9.1948	0	11.2115	4.5197	760	1	3.79647
TCGA.55.6985.01	11.0105	12.4395	9.951	10.2923	3.3155	10.8806	6.8571	1233	0	4.04517
TCGA.55.6986.01	10.4323	12.6497	5.6137	9.4972	2.7685	11.586	7.5132	3261	0	4.06646
TCGA.55.6987.01	10.2158	11.941	6.3551	11.046	4.0476	10.8323	4.9216	2137	0	3.65696
TCGA.55.7227.01	11.2195	12.2459	7.0326	10.0663	1.6198	10.6165	4.5732	952	1	3.584
TCGA.55.7281.01	10.9396	12.9122	7.0758	9.7966	2.8615	11.2865	3.8753	872	0	3.90545
TCGA.55.7283.01	10.444	12.3507	7.6971	8.8709	2.4624	10.1916	4.5884	609	0	3.71524
TCGA.55.7284.01	11.0129	11.8838	7.313	9.2371	3.8166	10.7281	5.0757	243	1	3.91474
TCGA.55.7570.01	10.3055	12.3206	8.958	8.2595	4.4249	11.0751	3.3435	824	0	4.17733
TCGA.55.7573.01	10.4836	12.0432	4.3934	10.7475	3.9459	10.6227	6.0056	487	0	3.60818
TCGA.55.7574.01	10.3719	12.3777	6.2557	10.1225	3.9344	10.9662	6.6921	995	1	3.91669
TCGA.55.7576.01	10.4999	12.4147	7.0812	8.713	1.5632	10.6937	6.2109	670	0	3.82792
TCGA.55.7724.01	8.9483	11.6691	7.724	11.089	3.7031	9.9173	6.3952	705	0	3.46451
TCGA.55.7725.01	9.0163	11.7278	5.9278	9.8056	4.3894	10.3528	9.0538	442	0	3.83672
TCGA.55.7726.01	10.2114	11.8811	9.6173	10.4405	4.7405	11.6236	8.7616	652	0	4.33315
TCGA.55.7727.01	9.5161	11.2327	4.6354	10.0828	2.2233	9.7961	3.9708	119	0	3.13131
TCGA.55.7815.01	9.0308	10.9866	3.81	10.2802	2.5874	9.2767	6.1728	773	0	3.04198
TCGA.55.7816.01	9.7328	12.0377	5.2475	11.3619	5.6323	10.0749	10.1828	468	1	3.77591
TCGA.55.7903.01	10.8075	12.1801	7.4338	9.1396	0.5833	10.5866	4.1245	567	0	3.5674
TCGA.55.7907.01	10.7517	12.7742	6.4687	9.4736	2.2955	11.417	3.9869	343	1	3.87823
TCGA.55.7910.01	10.4185	12.0595	6.2479	9.1252	3.2224	11.4589	9.1252	1040	0	4.18381
TCGA.55.7911.01	10.4509	12.4681	5.032	10.1178	2.7687	10.3456	2.2328	537	0	3.38936
TCGA.55.7913.01	10.7056	12.6127	4.565	7.0428	2.7526	12.0563	1.9522	561	1	4.15619
TCGA.55.7914.01	10.4699	12.3546	3.7542	9.644	6.1792	10.917	4.1692	187	1	3.92331
TCGA.55.7994.01	11.8409	11.7843	9.1255	9.3709	1.6854	10.9687	1.6854	603	0	3.70902
TCGA.55.7995.01	10.4506	11.6148	5.1388	9.8288	2.3105	10.6558	7.4441	889	0	3.64576
TCGA.55.8085.01	10.2875	12.0959	5.06	9.6151	1.454	11.0621	4.0879	904	0	3.55383
TCGA.55.8087.01	9.8334	12.3756	2.4692	9.0988	2.2748	11.0596	5.9316	462	0	3.65686
TCGA.55.8089.01	10.314	12.3111	10.0466	10.5049	2.2456	11.2986	4.7873	702	1	3.88193
TCGA.55.8090.01	10.6004	12.7347	6.9927	9.064	2.9659	11.8011	5.0801	598	1	4.15279
TCGA.55.8091.01	10.1684	12.0687	8.1566	10.2875	2.9546	11.4059	6.0746	600	0	3.94122
TCGA.55.8092.01	9.9692	12.5618	6.6209	10.1775	2.4459	11.6084	3.5456	154	1	3.78707
TCGA.55.8094.01	10.4785	12.8433	7.2517	6.4401	2.1942	10.7282	1.4793	541	0	3.98092
TCGA.55.8096.01	10.6387	12.0012	6.6463	9.9579	3.4971	11.3755	11.6107	719	1	4.23576
TCGA.55.8097.01	10.2264	12.5531	4.8188	9.2694	3.4071	11.2159	4.8591	476	0	3.87661
TCGA.55.8203.01	10.4058	12.3543	3.6233	10.0539	2.6455	10.7646	5.7864	547	0	3.57875
TCGA.55.8204.01	10.2417	12.3505	9.1056	11.4801	4.0019	11.5837	6.8149	515	0	4.04848
TCGA.55.8205.01	10.4984	11.9921	11.5478	9.7512	2.0582	10.0089	3.8996	599	0	3.65914
TCGA.55.8206.01	10.202	11.9393	5.4729	9.3328	3.6115	10.7715	6.8565	888	0	3.85951
TCGA.55.8207.01	10.5484	12.2764	7.1079	8.9796	3.2257	10.7654	5.9119	977	0	3.94439
TCGA.55.8208.01	10.1328	12.2555	6.6065	10.9003	3.7417	11.0696	4.4001	674	0	3.71326
TCGA.55.8299.01	9.9497	12.0991	7.9072	10.5208	4.3224	11.5222	6.803	469	1	4.08471
TCGA.55.8301.01	10.3958	12.5791	7.2517	10.556	2.0039	11.1899	2.0039	534	0	3.57529
TCGA.55.8302.01	11.6467	13.4549	9.5984	8.9464	3.837	12.0989	1.4122	478	0	4.37625
TCGA.55.8505.01	11.2966	12.7222	8.9881	9.8066	3.9205	11.1944	4.9567	440	0	4.12958
TCGA.55.8506.01	10.5315	12.066	7.5191	8.182	1.0882	11.5411	4.2914	11	0	3.95011
TCGA.55.8507.01	11.2833	12.5034	6.735	9.6608	1.662	11.2542	6.0665	418	0	3.87331
TCGA.55.8510.01	10.7198	11.8131	8.5669	9.729	3.2582	10.8896	3.3477	539	0	3.80128
TCGA.55.8511.01	10.8262	12.4544	8.7073	9.2207	4.3222	11.0926	3.9181	552	0	4.10505
TCGA.55.8512.01	10.1629	12.5435	8.5159	10.4005	3.5471	11.0635	7.4265	607	1	4.02572
TCGA.55.8514.01	10.8249	12.0451	8.0873	7.7581	3.2307	11.4357	5.6261	520	0	4.28086
TCGA.55.8614.01	10.8354	13.3978	9.2411	10.5637	3.6224	12.0646	7.0279	536	0	4.37165
TCGA.55.8615.01	10.5757	12.9358	5.2842	7.5015	1.6503	11.3754	2.5392	446	0	3.92209
TCGA.55.8616.01	10.7112	12.7813	8.4128	8.1041	2.6443	10.9977	4.1112	48	0	4.07903
TCGA.55.8620.01	9.1354	13.1647	3.9894	8.582	0	11.3052	4.857	375	1	3.62771
TCGA.55.8621.01	10.565	12.3659	6.7205	10.3975	4.7962	11.043	5.8922	515	0	3.97324
TCGA.55.A48X.01	10.8677	12.3157	6.5896	9.797	2.1445	11.2193	5.216	689	0	3.8102
TCGA.55.A48Y.01	9.5148	11.8955	6.392	9.6071	3.2332	11.6971	7.9349	630	0	4.07934
TCGA.55.A48Z.01	11.5526	12.2935	6.1819	9.5079	3.5325	11.1189	2.2763	651	0	3.81215
TCGA.55.A490.01	11.0023	11.9524	6.3694	8.6668	3.4383	10.7456	5.1473	99	1	3.91414
TCGA.55.A491.01	10.9562	12.3551	6.8027	9.7261	1.0418	11.5148	2.7704	626	0	3.68424
TCGA.55.A492.01	9.4644	12.243	5.1187	10.233	3.4824	11.2095	4.6802	596	0	3.71254
TCGA.55.A493.01	11.3845	12.0891	10.2015	9.6296	5.789	10.7114	4.0455	28	0	4.17504
TCGA.55.A494.01	10.9315	12.569	6.8451	8.0369	0.5296	10.9981	4.4491	481	0	3.81943
TCGA.55.A4DF.01	9.7932	12.2266	5.747	9.4408	2.9016	10.5361	9.5373	614	1	3.87705
TCGA.55.A4DG.01	10.5487	11.8793	5.1192	8.938	3.6557	10.8452	7.0933	608	0	3.9327
TCGA.55.A57B.01	10.8503	12.3203	5.389	11.7013	4.5369	11.1163	5.1231	546	0	3.71205
TCGA.56.1622.01	10.0978	12.7942	10.0509	13.0118	1.5801	11.6872	9.8385	881	1	3.89105
TCGA.56.5897.01	11.1286	12.5451	10.7313	10.1003	4.7199	11.0683	4.5519	378	0	4.18378
TCGA.56.5898.01	10.6492	13.1453	9.6712	11.6099	4.3078	11.7242	5.2709	555	0	4.13258
TCGA.56.6545.01	10.5525	13.3506	8.2224	11.509	3.8383	11.3108	7.3475	666	0	4.0448
TCGA.56.7221.01	10.8505	12.1833	8.3041	11.0622	0.9742	11.3084	2.8933	608	0	3.52925
TCGA.56.7222.01	10.4038	12.2986	9.477	11.9748	2.0517	11.2003	2.5591	562	1	3.52644
TCGA.56.7223.01	10.241	12.773	6.4599	8.9804	5.6285	11.2955	7.3845	442	1	4.36417
TCGA.56.7579.01	10.692	11.956	10.1778	7.4255	1.4634	10.6105	3.9126	951	1	3.96641
TCGA.56.7580.01	10.5239	13.0148	6.4587	12.9245	2.7486	12.3509	5.7654	925	0	3.82443
TCGA.56.7582.01	10.2369	12.5802	9.184	9.2356	1.8412	11.5879	7.6616	601	0	4.18535
TCGA.56.7730.01	10.4919	12.422	9.285	13.8315	2.0137	12.1336	11.5727	198	1	3.97123
TCGA.56.7731.01	10.528	12.9378	9.0689	11.5	2.5943	11.6243	7.4705	3	1	4.01775
TCGA.56.7822.01	11.0887	12.5953	8.177	10.1672	7.0894	12.085	3.1735	532	1	4.44565
TCGA.56.7823.01	11.2627	12.8699	9.3019	12.8726	0.6766	11.3651	5.032	1011	0	3.52809
TCGA.56.8082.01	10.4383	11.9902	7.4885	10.9995	1.1636	12.2066	3.3355	455	0	3.71632
TCGA.56.8083.01	10.7386	13.5181	6.8322	11.1852	3.0392	12.0041	12.1733	150	0	4.36617
TCGA.56.8201.01	10.4459	12.4391	9.7942	10.1336	4.9119	10.9364	11.4093	397	1	4.41879
TCGA.56.8304.01	11.0722	12.8893	9.427	8.5226	1.4166	11.5074	5.9067	106	0	4.20076
TCGA.56.8305.01	11.1435	12.6135	10.9074	7.6622	2.9516	11.9662	6.7583	105	0	4.65395
TCGA.56.8307.01	10.5556	12.695	7.3322	10.1762	0.541	11.6858	8.629	818	0	3.95177
TCGA.56.8308.01	11.0045	11.697	9.7177	10.1634	3.2647	12.0417	4.5827	517	0	4.14675
TCGA.56.8309.01	10.2997	12.5058	6.3254	12.1373	2.7148	11.2606	9.9035	428	0	3.79963
TCGA.56.8503.01	10.8218	12.7623	9.9142	11.9869	4.6733	12.0367	8.744	41	0	4.3542
TCGA.56.8504.01	10.4512	12.4198	9.0848	8.3425	2.021	10.9367	1.7853	510	0	3.85464
TCGA.56.8622.01	11.5008	12.5722	6.6644	9.41	6.9963	11.8787	12.5662	55	0	4.88214
TCGA.56.8623.01	10.6503	12.1856	8.0567	10.3438	4.5536	11.0658	5.553	692	1	4.00154
TCGA.56.8624.01	10.3328	12.9562	7.186	10.3083	5.2657	11.7301	9.7132	420	0	4.44491
TCGA.56.8625.01	10.1949	12.4882	6.864	10.0265	3.456	11.3356	6.3267	315	1	3.98684
TCGA.56.8626.01	10.7431	12.4701	8.2476	10.807	6.4017	12.2253	9.1734	302	1	4.61194
TCGA.56.8628.01	10.8425	12.6454	8.5094	12.7901	4.0767	12.0891	7.0927	616	0	4.05256
TCGA.56.8629.01	10.8958	12.9218	8.5237	9.373	2.4436	12.19	6.9752	481	0	4.35937
TCGA.56.A49D.01	10.8227	12.7321	7.5841	9.4531	3.09	11.2467	3.5262	637	0	3.94678
TCGA.56.A4BW.01	10.5349	12.2664	8.4575	10.6927	3.5146	11.2373	9.0163	585	0	4.09678
TCGA.56.A4BX.01	10.6026	11.7077	7.5417	11.4237	1.8974	11.3522	4.2993	405	0	3.56158
TCGA.56.A4BY.01	10.19	12.6905	9.2648	8.5471	2.8069	11.4485	7.5463	543	1	4.33096
TCGA.56.A4ZJ.01	10.7667	12.8067	6.8677	11.1437	5.0329	11.8688	5.9178	640	0	4.15785
TCGA.56.A4ZK.01	10.294	12.1621	8.3259	9.0144	2.6083	11.068	2.27	570	0	3.81631
TCGA.56.A5DR.01	10.3763	13.2042	11.0562	8.1194	2.8513	11.7719	2.4437	4	0	4.3548
TCGA.56.A5DS.01	10.8	12.2571	8.0203	9.8826	2.0005	11.3259	6.5476	8	0	3.94193
TCGA.56.A62T.01	10.8189	12.3027	10.2483	11.1232	5.2426	10.9957	9.9957	440	0	4.30144
TCGA.58.8386.01	10.3937	12.0815	10.6004	8.562	3.9392	11.6881	4.5313	1	1	4.36727
TCGA.58.8387.01	9.7974	12.3859	6.5073	8.7907	2.2103	11.4342	3.5709	403	1	3.86445
TCGA.58.8388.01	10.7369	12.5617	5.4196	9.0568	3.363	12.1667	14.7015	412	1	4.6648
TCGA.58.8390.01	10.775	12.8257	6.579	9.4177	3.0607	12.3657	7.8852	911	0	4.38695
TCGA.58.8391.01	11.0352	12.3309	9.9344	9.6803	2.4666	11.2139	4.2216	2167	0	3.98109
TCGA.58.8392.01	11.1445	13.8087	9.0626	12.4964	1.8137	11.382	9.9047	501	1	3.98697
TCGA.58.8393.01	11.0788	12.3789	8.8955	9.3337	2.91	10.8173	4.3911	1058	0	3.93118
TCGA.58.A46J.01	10.4136	12.5774	7.492	9.391	2.2338	11.247	4.7509	2589	0	3.89973
TCGA.58.A46K.01	10.0109	12.3715	8.8409	8.3062	2.4309	10.745	8.9084	1045	1	4.16741
TCGA.58.A46L.01	10.9853	11.4049	8.7404	11.2572	4.3684	11.2008	4.849	1723	0	3.85351
TCGA.58.A46M.01	9.9672	11.6684	8.0838	8.6479	0	10.704	5.6788	1072	0	3.63055
TCGA.58.A46N.01	10.6498	12.8381	9.0079	11.6491	3.9008	11.8488	3.2967	910	0	3.96276
TCGA.60.2695.01	9.8092	13.367	6.3335	8.5464	2.4001	13.2133	10.5908	642	0	4.76011
TCGA.60.2696.01	10.9131	12.0884	11.2159	8.2806	2.6058	11.8076	5.6137	109	1	4.41323
TCGA.60.2697.01	10.6012	12.2722	9.4221	11.0164	3.4718	11.0566	10.2457	372	1	4.12293
TCGA.60.2698.01	10.6053	12.239	10.5952	8.7244	4.352	11.2271	4.8703	311	1	4.31449
TCGA.60.2703.01	10.661	12.355	8.1696	10.1414	4.4396	12.0878	11.1508	2945	1	4.55729
TCGA.60.2704.01	10.3601	12.1279	8.3011	11.0242	4.0373	11.2942	7.8898	1154	1	4.03612
TCGA.60.2706.01	10.1597	13.2036	6.0653	8.7433	1.4377	11.1629	4.2305	2820	0	3.82887
TCGA.60.2707.01	10.9588	12.4173	11.7976	10.2546	3.4435	11.3763	6.3026	667	1	4.24213
TCGA.60.2708.01	11.0331	13.1459	9.3743	12.0733	4.288	12.1947	9.2491	2447	0	4.38527
TCGA.60.2709.01	10.55	12.6826	8.5496	11.2734	3.2349	11.3639	9.3722	1505	0	4.08918
TCGA.60.2710.01	10.9206	12.6502	9.2913	9.1889	2.063	11.6936	5.4141	2024	0	4.16679
TCGA.60.2711.01	10.1178	12.9698	6.6663	12.0041	0.7269	11.6117	7.8556	1260	0	3.6629
TCGA.60.2712.01	10.6062	12.5059	7.6849	10.1759	4.175	11.3682	10.2143	274	1	4.29586
TCGA.60.2713.01	10.8138	12.7244	8.7093	12.4208	3.7795	11.6818	3.7488	1731	0	3.82257
TCGA.60.2714.01	11.7398	11.9695	9.9544	8.5996	2.7635	11.4825	3.7292	1531	0	4.18004
TCGA.60.2715.01	10.7788	12.2745	8.5204	10.612	4.9026	11.0372	6.4444	1075	1	4.07515
TCGA.60.2716.01	10.1219	13.161	8.1312	11.1459	1.7041	11.9688	7.548	1475	0	4.01855
TCGA.60.2719.01	10.6792	12.1588	6.7917	8.0978	1.3314	10.9711	1.6429	1297	0	3.69318
TCGA.60.2720.01	11.161	13.3268	11.5856	11.0451	2.931	11.7211	9.6841	97	0	4.42387
TCGA.60.2721.01	10.2254	12.8307	6.7314	9.5715	2.6056	11.4991	4.847	983	0	3.95285
TCGA.60.2722.01	10.2	12.5201	10.4779	7.104	1.6253	11.7534	7.6118	908	0	4.51913
TCGA.60.2723.01	9.798	12.4989	8.2474	11.922	2.1512	11.6883	3.0473	1092	0	3.61228
TCGA.60.2724.01	10.5689	12.6632	9.8396	10.4021	2.9031	11.1213	6.257	717	0	4.01613
TCGA.60.2725.01	10.1637	12.342	8.5667	10.3653	3.1637	11.2643	8.8389	816	0	4.09753
TCGA.60.2726.01	10.446	12.5153	8.2623	8.305	3.2087	11.1985	9.5626	358	1	4.38269
TCGA.62.8394.01	11.5846	12.2566	7.2553	8.1013	2.3669	11.3435	4.6266	139	1	4.09618
TCGA.62.8395.01	10.0556	11.8718	3.5808	9.3697	3.471	11.0411	5.4445	1216	0	3.72947
TCGA.62.8397.01	10.2053	12.1353	5.9273	8.1802	0	11.2598	6.8438	1289	0	3.81924
TCGA.62.8398.01	10.9148	12.847	9.5937	8.5815	2.4605	12.5269	8.215	444	1	4.64712
TCGA.62.8399.01	11.3198	12.5105	9.9694	8.1493	2.3675	11.6856	4.5196	2696	0	4.31434
TCGA.62.8402.01	9.8491	12.2628	7.747	8.9617	1.984	11.4753	3.4401	1498	1	3.8803
TCGA.62.A46O.01	9.4009	11.2147	5.9871	7.6678	1.418	12.311	9.8379	1454	1	4.3029
TCGA.62.A46P.01	9.6857	12.631	4.9577	8.9202	3.0907	10.7772	4.2513	594	1	3.74475
TCGA.62.A46R.01	9.8422	11.6761	7.6153	9.144	3.3929	10.1655	2.9074	1725	1	3.59201
TCGA.62.A46S.01	10.0668	12.4553	6.2739	9.0327	3.0115	10.777	4.6088	1653	1	3.80907
TCGA.62.A46U.01	11.0413	11.8954	4.727	10.1831	4.4837	10.5206	0	2067	0	3.43386
TCGA.62.A46V.01	10.0445	11.6369	5.872	9.013	3.1603	10.8304	2.9906	2199	0	3.66715
TCGA.62.A46Y.01	10.3981	12.3435	7.339	9.652	1.8099	10.472	4.8861	414	1	3.62121
TCGA.62.A470.01	10.2587	11.8067	4.9904	8.2824	3.2661	10.9638	4.3719	1194	1	3.84484
TCGA.62.A471.01	10.504	12.5435	9.8892	8.5186	2.0247	12.6049	3.6741	1246	0	4.38017
TCGA.62.A472.01	9.6373	11.8926	8.3285	10.3164	3.4131	10.4268	0.9747	910	0	3.46486
TCGA.63.6202.01	10.7676	12.7994	9.4252	9.5908	3.3797	10.7866	3.4272	1602	0	3.9381
TCGA.63.7020.01	10.5303	13.2486	9.7489	11.9751	1.1877	11.2954	5.7728	2133	0	3.72763
TCGA.63.7021.01	10.4633	12.5073	11.0872	10.3803	5.4086	11.4057	6.0465	2142	0	4.35478
TCGA.63.7022.01	10.625	12.9515	7.6654	10.7075	4.1977	11.3332	5.5114	2073	0	4.03101
TCGA.63.7023.01	10.1177	12.3507	9.4162	14.1048	1.7522	11.8556	8.3148	1682	0	3.67087
TCGA.63.A5MB.01	10.1343	12.4383	8.1737	7.9194	1.8449	11.1565	8.942	3123	0	4.23738
TCGA.63.A5MG.01	10.6598	12.5321	8.7749	11.5065	3.5064	11.7439	3.9973	2148	0	3.9153
TCGA.63.A5MH.01	11.2278	12.7499	7.3902	6.1747	5.8446	11.9529	11.3141	2026	0	5.16279
TCGA.63.A5MI.01	10.3706	12.7726	7.3562	7.1384	2.6925	11.6157	4.8785	1784	0	4.31784
TCGA.63.A5MJ.01	9.9595	12.6556	10.4936	7.642	4.2137	11.2394	8.8889	1824	0	4.63668
TCGA.63.A5ML.01	9.9777	11.5362	7.8453	7.5379	3.694	11.2873	10.2092	1386	0	4.44922
TCGA.63.A5MM.01	11.0471	12.6399	10.296	11.0894	4.1497	11.7206	10.0285	456	1	4.42022
TCGA.63.A5MN.01	10.8679	12.4472	7.9856	10.4433	4.3658	10.7623	3.2893	345	1	3.81564
TCGA.63.A5MP.01	9.6521	11.5729	8.9134	12.3227	1.4816	12.0911	10.1739	769	0	3.89795
TCGA.63.A5MR.01	10.9117	12.6704	12.1219	11.6557	7.3804	12.1875	6.9767	2716	0	4.70248
TCGA.63.A5MS.01	10.7288	12.0215	8.1386	9.7229	4.2134	11.6767	5.0405	2381	0	4.15971
TCGA.63.A5MT.01	10.6301	12.1657	10.0096	11.0691	4.1442	12.0034	4.3445	498	0	4.13667
TCGA.63.A5MV.01	10.05	12.4203	7.021	8.8126	3.4821	12.1978	9.5159	1100	0	4.49623
TCGA.63.A5MW.01	10.9227	12.2562	7.366	12.1276	4.0366	12.2758	7.3087	1639	0	4.09702
TCGA.63.A5MY.01	10.1159	12.143	5.7499	5.4316	0.5492	11.1862	2.3701	1052	0	3.95265
TCGA.64.1676.01	9.6672	11.5362	9.2947	7.9562	1.2544	9.8165	4.6181	1728	0	3.60284
TCGA.64.1677.01	10.2051	12.8066	6.8428	9.0661	1.0663	10.8678	2.0984	628	1	3.58653
TCGA.64.1678.01	7.8774	12.6098	5.8378	6.0361	1.9296	10.338	9.4697	1189	0	4.10317
TCGA.64.1679.01	11.2441	12.0837	6.8891	9.8784	3.4028	10.4209	3.8717	2488	0	3.67113
TCGA.64.1680.01	9.7096	12.3212	6.3787	8.8638	2.6396	10.5102	5.2045	1126	0	3.73887
TCGA.64.1681.01	10.2134	12.573	7.221	9.2137	2.5106	10.5051	5.0673	1167	1	3.76209
TCGA.64.5774.01	9.8456	12.6929	4.3683	8.612	1.7397	11.519	9.0079	2676	0	4.05133
TCGA.64.5775.01	9.8997	12.8866	11.3756	10.7404	1.2584	11.936	8.8161	62	1	4.21154
TCGA.64.5778.01	10.2292	12.9618	5.9231	8.825	2.9535	10.9484	3.4409	1305	0	3.84481
TCGA.64.5779.01	11.0761	12.1415	5.1774	9.5613	3.4356	11.1918	9.3036	864	0	4.07684
TCGA.64.5781.01	9.7646	12.8277	9.5387	9.7941	2.7629	11.7642	4.3429	1559	0	4.10075
TCGA.64.5815.01	10.9105	12.5602	6.7631	9.1482	4.1924	10.9391	3.9203	866	0	3.97967
TCGA.66.2727.01	9.8264	12.3391	9.1349	8.1274	2.0741	10.8116	9.6791	516	1	4.214
TCGA.66.2734.01	10.8775	12.7162	9.8635	8.6894	4.077	11.6923	5.3863	1311	0	4.44564
TCGA.66.2737.01	9.9065	12.4647	8.7668	9.3435	3.8045	10.8924	7.5159	61	0	4.13598
TCGA.66.2742.01	10.0964	12.2016	9.0664	9.9462	2.3884	10.8451	6.9134	641	0	3.89095
TCGA.66.2744.01	9.567	12.4939	8.9263	11.9268	2.7054	10.9193	9.3733	30	0	3.81498
TCGA.66.2753.01	10.1436	12.0818	10.1654	10.473	1.8868	10.7237	4.9706	31	0	3.70273
TCGA.66.2754.01	8.7615	12.6201	5.4647	6.8742	1.71	10.9252	6.2299	61	0	3.98214
TCGA.66.2755.01	9.868	12.4166	6.0073	11.3779	2.1882	11.6176	13.315	28	0	4.05434
TCGA.66.2756.01	9.2091	12.6725	4.5071	7.248	1.7352	11.1902	8.8988	30	0	4.10983
TCGA.66.2757.01	10.0523	12.853	5.3392	8.3901	2.1218	11.2498	8.3837	1338	1	4.08992
TCGA.66.2758.01	9.5494	12.555	7.9856	8.8875	2.689	11.709	9.9024	639	0	4.35393
TCGA.66.2759.01	11.8859	11.5114	9.9512	8.8874	5.7461	10.5558	4.8758	762	0	4.22415
TCGA.66.2763.01	10.7438	12.9331	7.1639	8.9107	1.8187	10.8717	8.2837	30	0	4.03161
TCGA.66.2765.01	11.2771	13.0549	10.0949	11.731	2.9614	11.4218	9.7959	61	0	4.18401
TCGA.66.2766.01	10.1763	11.9496	7.5208	7.8505	1.5758	10.359	6.8956	31	0	3.85566
TCGA.66.2767.01	10.2542	12.4352	8.0632	10.3405	4.5206	11.1022	6.1112	61	0	4.03979
TCGA.66.2768.01	11.464	12.8062	10.8481	10.3577	5.7049	11.2936	8.0674	61	0	4.51432
TCGA.66.2769.01	9.8064	12.7503	7.4422	10.8992	4.7403	11.0699	6.8104	215	1	3.99572
TCGA.66.2770.01	10.7533	12.2148	8.424	9.5653	4.4789	10.7207	7.4353	700	0	4.12444
TCGA.66.2771.01	9.2663	12.5099	6.6532	9.7165	1.736	9.8019	4.2963	578	0	3.34786
TCGA.66.2773.01	10.0944	12.1314	8.7195	8.7508	3.8071	11.0211	4.9236	92	1	4.08815
TCGA.66.2777.01	10.9119	12.1694	9.2904	8.8723	2.382	11.4035	4.5952	61	0	4.08339
TCGA.66.2778.01	9.8381	12.6129	6.9506	7.2464	1.4226	10.7782	5.1133	578	0	3.94048
TCGA.66.2780.01	10.1561	12.9082	10.2262	10.0828	3.2304	11.741	6.5315	366	1	4.27007
TCGA.66.2781.01	10.498	11.7465	8.0299	11.2003	2.4771	11.5155	12.8937	121	0	4.12927
TCGA.66.2782.01	9.514	12.5933	9.6936	9.2981	4.4096	10.7037	3.1104	365	1	3.97604
TCGA.66.2783.01	10.2072	12.4241	8.7845	8.813	2.9502	11.7544	5.6034	759	0	4.24332
TCGA.66.2785.01	10.7819	12.2629	7.1283	9.5344	3.4833	12.1166	4.4173	60	0	4.16125
TCGA.66.2786.01	9.8714	12.8022	10.0555	9.3646	3.1434	11.7767	7.3804	790	0	4.36952
TCGA.66.2787.01	9.7353	12.4462	7.9162	8.6269	1.6543	10.9838	9.2232	1217	0	4.07702
TCGA.66.2788.01	11.2433	12.8823	10.6334	10.1817	4.7962	11.3973	6.1758	699	0	4.3688
TCGA.66.2789.01	9.9422	13.1454	6.3717	12.1408	3.6096	10.2953	8.032	123	1	3.60032
TCGA.66.2790.01	10.5314	12.854	7.7922	11.4962	3.2599	11.0677	9.6797	699	0	3.98434
TCGA.66.2791.01	10.293	12.6826	8.3643	9.7631	4.324	10.286	6.9189	153	1	3.97357
TCGA.66.2792.01	10.0503	12.0002	8.2753	13.66	2.5688	11.3993	6.0398	913	0	3.48872
TCGA.66.2793.01	10.6675	12.8461	4.3951	13.7711	2.2007	10.5768	10.2231	306	1	3.3533
TCGA.66.2794.01	8.8629	11.9397	9.207	12.7996	1.2559	11.0196	7.3443	1645	0	3.43497
TCGA.66.2795.01	9.7507	12.6094	7.3401	8.2308	2.0514	10.7899	9.2009	122	0	4.09989
TCGA.66.2800.01	10.2577	11.9684	8.8341	10.7498	2.5448	11.4395	8.4621	1492	0	4.00241
TCGA.67.3770.01	9.8265	12.1034	4.9134	7.8416	2.5108	10.1324	4.237	610	0	3.62488
TCGA.67.3771.01	10.0529	12.5324	7.3678	8.8443	2.635	11.3519	3.9385	610	0	3.96274
TCGA.67.3772.01	10.0479	12.6856	6.39	8.7633	1.5224	10.5873	7.3151	573	0	3.81591
TCGA.67.3773.01	9.7927	12.3275	4.1247	8.3748	3.2051	10.1269	3.9438	427	0	3.58704
TCGA.67.3774.01	10.067	12.5101	7.9954	9.1517	4.287	11.3634	5.2003	385	0	4.17462
TCGA.67.4679.01	10.5478	12.1524	4.2751	9.3832	3.5019	10.7728	4.5821	448	0	3.70391
TCGA.67.6215.01	10.2904	12.0451	4.0241	8.341	1.8508	10.5914	3.8855	174	0	3.56575
TCGA.67.6216.01	10.5913	12.6607	6.6183	10.8393	1.4689	11.2637	5.0624	141	0	3.64323
TCGA.67.6217.01	10.5931	12.3575	5.8402	9.4901	2.8588	10.4968	5.8544	422	0	3.72612
TCGA.68.7755.01	10.1043	12.2303	10.9043	8.6465	0.9456	10.8246	9.3784	83	0	4.12627
TCGA.68.7756.01	10.5564	12.452	11.3856	10.6449	4.5795	11.5697	4.5027	202	0	4.22304
TCGA.68.7757.01	10.5236	12.9326	8.4647	12.3508	4.3061	11.7544	5.4643	211	0	3.9751
TCGA.68.8250.01	10.4265	12.8337	8.3435	13.3322	2.5442	10.7163	5.8278	244	0	3.44267
TCGA.68.8251.01	10.4676	12.8469	7.6208	9.0142	3.7124	11.6592	5.2059	406	0	4.23603
TCGA.68.A59I.01	9.9328	12.2931	8.1954	11.7449	5.1085	10.5924	7.6117	428	0	3.85701
TCGA.68.A59J.01	10.5797	11.566	8.4554	9.0433	2.3024	11.3926	7.0738	409	0	4.0671
TCGA.69.7760.01	9.7065	11.8865	7.3632	10.7126	2.2472	10.5209	6.4565	202	0	3.55523
TCGA.69.7761.01	9.6048	12.0462	7.4493	9.8782	2.2563	9.7316	3.8571	186	0	3.35324
TCGA.69.7763.01	10.7437	13.1082	6.9046	9.9268	4.1335	11.6231	7.0724	690	0	4.2462
TCGA.69.7764.01	10.4818	11.8794	3.2661	8.5431	2.4962	10.5137	4.5574	414	0	3.5717
TCGA.69.7765.01	10.6088	12.1159	7.4474	10.4588	4.347	11.0164	6.0562	165	0	3.94292
TCGA.69.7973.01	9.1021	12.5744	4.0651	8.4161	2.8973	10.9805	7.9095	230	0	3.94218
TCGA.69.7974.01	11.4944	12.6952	9.8224	9.4679	2.4353	11.1878	2.5116	184	0	3.95841
TCGA.69.7978.01	11.3054	11.8647	9.092	9.9831	3.1266	10.7694	3.2336	134	0	3.77983
TCGA.69.7979.01	11.5717	12.2512	8.4776	7.7343	3.3202	12.6459	5.6932	408	0	4.65481
TCGA.69.7980.01	10.8997	13.0627	6.5976	9.0418	3.0616	11.4334	5.9239	362	0	4.1388
TCGA.69.8253.01	10.1132	12.9763	7.9649	8.3644	3.5325	11.7385	7.0366	426	0	4.42053
TCGA.69.8254.01	10.3268	12.3207	7.9036	9.4939	7.3739	10.4126	4.2821	409	0	4.13752
TCGA.69.8255.01	9.8018	11.8713	4.8996	9.7054	1.077	10.6455	2.8283	129	0	3.29769
TCGA.69.A59K.01	9.9539	11.3663	9.0546	9.5258	3.5934	12.0339	3.1691	522	0	4.07618
TCGA.70.6722.01	10.6991	12.5604	9.5389	12.4724	2.9176	11.2045	5.0344	367	0	3.70805
TCGA.70.6723.01	11.7841	11.9167	9.7307	7.4348	2.1915	10.7401	5.5893	375	0	4.16778
TCGA.71.6725.01	10.9393	11.9879	7.6909	7.4262	2.0427	10.7607	4.4938	256	0	3.97284
TCGA.71.8520.01	10.3282	12.2124	6.9729	8.6845	2.848	11.5268	3.604	210	1	3.99191
TCGA.73.4658.01	10.8571	12.1642	8.9486	10.1175	2.9827	10.7113	7.7407	1600	1	3.95775
TCGA.73.4659.01	9.9866	12.4091	6.3391	9.2413	3.9981	10.9009	8.2143	711	1	4.07914
TCGA.73.4662.01	10.419	11.9855	6.5448	8.9067	2.7783	10.2986	4.9869	2515	0	3.69526
TCGA.73.4666.01	11.1579	12.0289	11.2254	8.3586	2.0942	10.8675	3.6805	800	0	4.04131
TCGA.73.4668.01	12.2516	12.5632	8.8456	8.5362	2.3033	11.3766	6.016	467	0	4.24908
TCGA.73.4670.01	10.7113	12.659	8.2995	8.3292	3.7034	12.0577	3.8197	131	0	4.37391
TCGA.73.4675.01	10.1674	12.8188	7.7977	12.0302	3.8401	11.3418	10.3913	922	1	4.05615
TCGA.73.4676.01	10.3185	12.2148	9.4679	7.6396	2.5234	10.564	4.5663	281	1	4.03051
TCGA.73.4677.01	10.4405	12.2802	7.7283	8.7338	2.4921	10.6779	4.6099	38	1	3.84765
TCGA.73.7498.01	10.5524	12.2268	4.9016	9.9009	4.2676	11.2168	5.4436	1189	0	3.89957
TCGA.73.7499.01	10.4931	12.1368	5.6143	8.903	3.68	10.9962	6.7023	1531	1	4.00067
TCGA.73.A9RS.01	9.4993	12.7719	6.0085	7.5917	0.911	11.2853	2.4333	340	1	3.79191
TCGA.75.5125.01	10.6066	12.3639	9.4233	9.2989	4.4682	11.0553	2.0331	2027	1	4.02617
TCGA.75.5146.01	9.54	12.6081	3.8546	8.1084	2.7376	10.3597	6.8644	2368	0	3.77523
TCGA.75.5147.01	10.3348	12.068	6.7673	8.3525	2.5882	10.1431	4.9715	1333	0	3.72129
TCGA.75.6206.01	10.2616	12.53	6.4569	11.2094	2.4344	11.0272	6.5077	2590	0	3.66944
TCGA.75.6212.01	10.8087	12.2347	6.0547	10.1887	2.292	11.2838	5.4806	1516	1	3.76859
TCGA.75.6214.01	11.0915	12.5081	10.3769	7.61	1.778	10.9643	3.2938	1115	1	4.10194
TCGA.75.7025.01	9.9201	12.303	6.52	10.3694	3.2778	11.0419	9.2826	3305	0	3.95925
TCGA.75.7027.01	10.6571	12.9706	8.651	8.4779	4.005	11.6354	4.6948	3059	0	4.36792
TCGA.77.6842.01	10.6455	12.7872	5.2915	9.8701	1.4411	11.0136	7.452	899	1	3.76218
TCGA.77.6843.01	10.3543	13.0869	7.9269	11.2547	1.8731	11.5488	11.1078	2224	1	4.08942
TCGA.77.6844.01	10.8505	12.895	8.0841	8.6442	1.6031	11.1733	7.6441	2284	1	4.13229
TCGA.77.6845.01	10.1291	11.7656	8.4849	7.3919	1.7824	11.5452	3.9013	708	1	4.09791
TCGA.77.7138.01	11.8054	12.7312	9.8941	9.2633	4.1985	10.3487	8.194	340	1	4.24653
TCGA.77.7139.01	9.8085	12.2322	8.9895	11.7377	0	11.6643	9.2436	4261	0	3.74953
TCGA.77.7140.01	10.1952	12.8713	8.8696	13.0317	2.1281	11.075	2.1281	632	1	3.36358
TCGA.77.7141.01	9.8359	12.48	8.2021	10.5838	1.7292	11.3061	10.0396	15	0	3.9862
TCGA.77.7142.01	10.0026	11.6113	7.1191	13.1423	3.2461	10.5425	9.4961	2227	0	3.48603
TCGA.77.7335.01	10.3256	12.7002	7.9386	11.3378	3.3394	10.9429	10.1078	2133	1	3.98754
TCGA.77.7337.01	11.4208	12.6132	9.9629	11.4793	2.6119	10.0864	4.938	3253	1	3.5839
TCGA.77.7338.01	11.0282	12.0244	9.885	9.2201	4.6914	11.1733	4.9817	5	1	4.24265
TCGA.77.7463.01	10.3647	12.4176	8.8203	12.5754	0.4901	11.127	2.0828	1423	1	3.24269
TCGA.77.7465.01	10.0169	12.8357	5.3355	9.5075	1.3825	11.2002	11.2002	990	0	4.00973
TCGA.77.8007.01	11.6463	12.7842	11.2645	9.02	3.3699	11.9228	2.071	198	1	4.3409
TCGA.77.8008.01	11.3556	12.7754	8.3136	9.7622	6.1867	11.7357	6.4875	2639	1	4.5242
TCGA.77.8009.01	10.536	12.3914	8.5737	7.4917	2.7576	11.3912	6.2071	1695	1	4.3288
TCGA.77.8128.01	9.8115	12.0582	9.1519	13.0551	2.6877	12.1402	5.2205	1150	1	3.74913
TCGA.77.8130.01	11.3523	13.6801	10.8633	8.2609	4.2173	12.6592	7.6189	4765	0	5.00563
TCGA.77.8131.01	11.7767	12.935	9.6442	10.3906	4.0211	11.6198	8.3509	383	1	4.40955
TCGA.77.8133.01	10.4027	12.5332	7.7491	9.8834	1.3953	11.6822	9.6486	1640	1	4.11682
TCGA.77.8136.01	11.7512	12.7949	9.8003	9.7599	4.5702	11.2725	8.4716	1189	1	4.45453
TCGA.77.8138.01	10.3916	13.555	8.8851	8.8414	4.4091	11.6712	4.3233	539	1	4.40207
TCGA.77.8139.01	10.8486	12.8577	8.9979	11.8028	3.6056	11.1857	4.8234	3166	0	3.84275
TCGA.77.8140.01	10.1969	13.4261	7.3226	8.0586	1.7009	12.391	4.5552	351	1	4.3307
TCGA.77.8143.01	10.8136	12.3211	6.3771	7.0517	1.9079	11.8859	2.0743	803	1	4.1128
TCGA.77.8144.01	11.2059	12.6109	11.5432	13.556	1.2556	12.0099	4.6992	833	0	3.72584
TCGA.77.8145.01	10.9586	13.1081	8.9528	11.8692	4.1601	12.32	6.2011	212	1	4.25004
TCGA.77.8146.01	9.8229	13.0397	9.4621	10.6608	2.5635	11.2214	5.6472	3189	0	3.92822
TCGA.77.8148.01	10.4084	11.9512	9.055	12.0009	2.3121	11.4294	3.9226	2023	0	3.61897
TCGA.77.8150.01	10.1176	12.3061	10.3769	11.3046	1.819	12.2155	2.8721	1655	1	3.8785
TCGA.77.8153.01	11.2257	11.9386	10.1873	9.703	2.0331	12.3424	3.8482	1992	0	4.17754
TCGA.77.8154.01	10.6878	11.5586	8.5962	8.4189	2.0384	11.2415	5.6996	1841	0	4.02521
TCGA.77.8156.01	10.691	11.8913	9.1546	12.2889	3.4267	11.5825	2.4729	1106	0	3.66501
TCGA.77.A5FZ.01	10.6555	12.1981	8.0718	11.0763	2.672	10.8519	5.0286	3838	1	3.66265
TCGA.77.A5G1.01	10.5396	14.0202	7.9206	11.4093	7.2585	11.3852	4.7199	4026	0	4.3047
TCGA.77.A5G3.01	10.0532	12.074	9.4107	12.4294	3.1176	11.4937	4.3361	4570	0	3.69104
TCGA.77.A5G6.01	10.4025	13.1956	5.6532	12.3311	1.8464	11.049	8.7957	678	1	3.61938
TCGA.77.A5G7.01	10.1018	12.1328	8.1139	8.0641	3.2903	11.8457	9.438	180	1	4.51356
TCGA.77.A5G8.01	10.2958	11.4785	9.1799	11.5205	4.0127	11.0528	4.6733	1884	0	3.74325
TCGA.77.A5GA.01	9.9972	11.3107	8.7078	8.5141	2.7353	11.3462	10.0466	1280	0	4.27298
TCGA.77.A5GB.01	11.896	12.4269	10.9854	9.3298	4.2832	11.969	9.6565	937	1	4.7399
TCGA.77.A5GF.01	9.831	12.1319	9.1351	10.8949	2.2626	11.2967	9.0131	840	1	3.96237
TCGA.77.A5GH.01	10.5123	12.0671	6.2445	11.3316	2.983	11.8405	8.402	1182	0	3.95466
TCGA.78.7143.01	10.4847	11.4733	7.106	8.78	2.2746	10.8655	8.0494	4961	1	3.93814
TCGA.78.7145.01	10.4583	12.256	7.7762	8.6149	2.4996	10.3015	3.8464	826	1	3.73595
TCGA.78.7146.01	10.3851	11.9958	10.465	7.9499	1.5801	10.924	2.3162	173	1	3.91487
TCGA.78.7147.01	11.2883	12.5039	5.9274	8.3801	2.407	11.1499	5.6747	586	1	4.01291
TCGA.78.7148.01	11.5939	13.1431	6.7815	8.8864	2.3935	11.5655	4.6703	626	1	4.11117
TCGA.78.7149.01	10.3681	12.5731	6.5059	11.7158	3.4496	11.2446	3.8861	3940	0	3.63606
TCGA.78.7150.01	9.8348	12.9342	8.4855	8.7621	2.9791	11.777	5.7795	666	1	4.27879
TCGA.78.7152.01	9.6629	12.2952	5.3549	11.0994	2.237	10.6695	5.4803	1215	1	3.42665
TCGA.78.7153.01	9.2237	12.3598	4.6049	8.8232	0.6907	11.0764	4.0314	3635	0	3.53329
TCGA.78.7154.01	8.8622	12.2265	9.3559	8.506	1.9915	10.727	4.4875	593	1	3.84418
TCGA.78.7155.01	10.5998	12.6949	3.7794	7.2262	3.2751	10.7255	7.5495	1171	1	4.10264
TCGA.78.7156.01	9.7066	12.0616	5.2362	9.7635	3.5326	10.9836	3.3685	976	1	3.656
TCGA.78.7158.01	10.211	12.6416	3.6092	9.5877	6.1523	11.3684	3.0822	179	1	3.98829
TCGA.78.7159.01	9.749	12.1594	4.6889	9.7927	1.4076	10.8559	6.0686	1974	0	3.53993
TCGA.78.7160.01	11.0526	12.5199	7.7303	10.2079	3.3873	11.3922	7.4933	697	1	4.1128
TCGA.78.7161.01	10.9717	12.0124	5.6186	8.4037	3.7143	11.7588	7.349	291	1	4.28917
TCGA.78.7162.01	9.9513	12.5038	4.7538	10.0114	2.8521	10.7235	5.1	3169	1	3.60968
TCGA.78.7163.01	9.7862	12.718	7.0936	8.2833	2.6172	9.6078	2.3529	7248	0	3.52324
TCGA.78.7166.01	10.8801	13.05	8.3468	8.6245	1.8777	12.135	3.2435	258	1	4.20137
TCGA.78.7167.01	10.0601	12.5465	4.927	9.2362	2.7957	11.1184	5.6102	2681	1	3.83519
TCGA.78.7220.01	9.4201	12.0644	7.6453	7.8809	1.613	10.9177	6.5413	807	1	3.95554
TCGA.78.7535.01	11.4525	12.4602	8.553	8.6746	1.9423	11.0182	2.1871	949	1	3.86605
TCGA.78.7536.01	9.9001	12.1076	2.9836	8.5113	0	11.1699	5.3816	244	1	3.52155
TCGA.78.7537.01	9.9548	12.5242	5.9117	10.998	1.2789	10.8028	4.7943	1622	1	3.40803
TCGA.78.7539.01	10.5313	12.5822	4.4342	11.7367	5.2744	10.7829	1.4685	791	0	3.47666
TCGA.78.7540.01	11.3816	12.6589	6.4067	8.5853	1.9937	11.0949	4.2651	1197	1	3.90826
TCGA.78.7542.01	11.8838	12.9251	12.6886	8.8227	1.4186	11.2124	4.2364	321	1	4.2138
TCGA.78.7633.01	9.7695	12.5043	5.2313	7.782	3.3925	10.9297	3.5778	1528	1	3.92056
TCGA.78.8640.01	10.3108	12.5471	5.5029	8.4725	1.4597	11.3958	1.97	7062	0	3.73006
TCGA.78.8648.01	10.7131	12.3402	7.5906	10.5528	3.9556	11.2498	7.5143	1209	1	4.05387
TCGA.78.8655.01	10.8804	12.6237	5.3762	8.7452	2.263	11.1148	2.9939	2360	0	3.77953
TCGA.78.8660.01	10.9153	13.2319	9.7348	9.3919	2.8907	10.4562	1.737	321	1	3.81294
TCGA.78.8662.01	11.1787	12.4361	4.6337	7.0805	0.7327	12.0073	1.2164	3361	1	3.92429
TCGA.80.5608.01	10.3832	13.2384	5.3095	8.3791	2.0676	10.8236	5.6111	2832	0	3.89282
TCGA.80.5611.01	10.2665	12.0625	5.1746	8.9638	1.418	10.3385	0	2595	0	3.25618
TCGA.83.5908.01	10.8039	12.7597	11.4441	9.6501	2.6455	11.1331	4.4365	824	0	4.09545
TCGA.85.6175.01	10.7159	12.4673	8.3045	12.3632	6.0903	11.2991	10.4076	294	1	4.23485
TCGA.85.6560.01	10.7655	12.7265	5.8356	9.2347	2.5142	11.6961	9.2016	1259	0	4.21633
TCGA.85.6561.01	11.1005	11.8112	9.298	11.473	3.5721	11.1098	7.9292	1224	0	3.95122
TCGA.85.6798.01	11.2484	13.0807	8.5411	11.7587	2.6884	11.4691	11.2349	195	1	4.16021
TCGA.85.7696.01	9.9645	11.3714	8.1032	10.6672	3.2957	11.0936	7.5627	1111	0	3.85457
TCGA.85.7697.01	11.2306	12.2687	9.3958	9.5016	2.9228	11.7657	8.1516	1063	0	4.3473
TCGA.85.7698.01	10.1665	12.187	9.391	11.9547	3.602	11.348	9.0786	952	0	4.00621
TCGA.85.7699.01	10.5045	13.2093	6.2698	10.5247	2.6422	11.2469	14.0701	1001	1	4.25652
TCGA.85.7710.01	9.7022	12.3113	8.4246	8.4101	1.439	12.0519	6.9447	42	0	4.23956
TCGA.85.7843.01	10.5763	12.048	9.7794	8.6169	3.2707	10.6329	7.3079	35	0	4.14604
TCGA.85.7844.01	10.2427	12.2041	7.0051	9.2356	3.4751	11.2401	7.7211	911	0	4.11521
TCGA.85.7950.01	9.6755	11.9493	8.4063	13.9541	3.6178	11.4095	11.5163	576	0	3.80959
TCGA.85.8048.01	10.6755	11.8378	7.6881	10.37	4.3455	10.8981	7.6921	765	0	3.99715
TCGA.85.8049.01	10.6449	12.0623	9.4141	10.0566	2.6323	11.0626	8.7395	579	0	4.0717
TCGA.85.8052.01	10.0767	12.6295	9.3255	8.7017	3.3682	11.7286	7.6776	734	0	4.43109
TCGA.85.8070.01	9.6446	11.4974	7.054	7.4595	1.5236	11.7078	1.17	960	0	3.85401
TCGA.85.8071.01	11.3676	12.6041	9.2727	13.8697	0.7815	11.3099	5.4638	815	0	3.40552
TCGA.85.8072.01	10.5625	12.2796	8.5825	8.737	3.0208	11.0226	1.8431	932	0	3.89082
TCGA.85.8276.01	10.1982	12.9157	8.353	9.8607	4.4268	11.5784	8.5021	1050	0	4.37454
TCGA.85.8277.01	9.0284	12.6302	8.819	8.2724	2.1787	11.1043	3.1597	307	1	3.92934
TCGA.85.8287.01	10.5253	12.432	6.6043	11.7725	3.0372	11.5129	10.6405	23	1	3.9881
TCGA.85.8288.01	10.7327	12.5741	7.5187	9.5255	2.8957	11.8799	6.8141	402	1	4.21332
TCGA.85.8350.01	10.5458	12.7497	7.1575	11.9041	4.7476	11.6297	9.8374	683	0	4.17559
TCGA.85.8351.01	10.6913	13.3643	9.8832	10.0971	2.0352	11.8149	7.59	510	0	4.27167
TCGA.85.8352.01	10.5233	13.4236	5.494	8.4001	1.4569	11.8779	4.5924	161	1	4.06705
TCGA.85.8353.01	11.1545	11.794	10.1532	9.3583	3.8318	11.7521	5.9519	94	1	4.33183
TCGA.85.8354.01	10.6157	12.5266	9.4568	8.2817	0.6021	11.6147	1.3525	995	0	3.90608
TCGA.85.8355.01	10.4564	11.808	8.4434	12.025	2.129	11.169	7.7328	61	0	3.68359
TCGA.85.8479.01	11.9983	12.7708	8.8975	7.2546	7.5643	12.3047	6.3058	22	0	5.14009
TCGA.85.8481.01	10.2717	12.7227	10.3592	8.9678	4.5131	12.1974	3.8801	236	1	4.49884
TCGA.85.8580.01	10.7861	12.4301	8.3655	11.1968	1.4287	11.8618	5.5096	1113	0	3.83842
TCGA.85.8582.01	11.1838	12.4809	8.5851	10.2832	5.1628	11.1736	6.283	1160	0	4.20217
TCGA.85.8584.01	10.3704	12.2022	8.4388	9.985	3.9035	11.6391	4.5545	383	1	4.08134
TCGA.85.8664.01	10.157	13.1164	5.9743	8.7971	2.0243	11.1564	10.2028	550	1	4.15794
TCGA.85.8666.01	10.9601	12.0473	10.4506	8.7508	2.8903	10.7921	5.5036	687	1	4.0938
TCGA.85.A4CL.01	10.0546	11.7204	8.7033	9.5558	4.1256	12.3128	4.9858	921	1	4.29542
TCGA.85.A4CN.01	10.4465	12.6929	10.0225	11.6561	3.5216	11.7059	6.0496	1038	0	4.05826
TCGA.85.A4JB.01	10.759	13.0836	10.2094	11.9608	2.3671	11.7929	6.4111	942	0	4.00882
TCGA.85.A4JC.01	10.6424	12.5485	10.4209	7.8836	3.4921	11.951	8.4547	604	1	4.70593
TCGA.85.A4PA.01	10.645	12.505	5.2376	11.8198	1.9356	11.0716	7.428	741	0	3.558
TCGA.85.A4QQ.01	11.0714	12.9333	8.0733	7.381	8.6289	12.0899	5.5797	927	1	5.06908
TCGA.85.A4QR.01	10.1548	11.7299	7.9052	12.2204	1.4881	11.2029	6.2717	600	0	3.48958
TCGA.85.A50M.01	11.594	12.5926	9.6218	8.8491	4.2558	12.0955	10.3796	826	1	4.79399
TCGA.85.A50Z.01	10.6164	11.7391	8.4008	12.7659	1.262	10.3163	2.501	493	0	3.04945
TCGA.85.A510.01	8.857	12.4526	5.5679	8.8116	0.6349	11.196	7.5103	482	0	3.7706
TCGA.85.A511.01	10.5526	12.3364	9.0815	11.8824	5.2231	11.5347	7.6042	455	1	4.15152
TCGA.85.A512.01	10.1207	11.7608	10.4724	14.1536	3.7457	11.9815	8.8055	465	0	3.90788
TCGA.85.A513.01	10.4883	12.6102	7.1196	10.4851	2.7669	11.316	5.1634	910	0	3.84097
TCGA.85.A53L.01	10.2201	12.0848	8.8733	11.6901	4.4136	10.8008	6.7964	377	0	3.83744
TCGA.85.A5B5.01	9.6796	12.6435	9.4637	11.2435	3.9709	12.2343	2.9834	111	0	4.06011
TCGA.86.6562.01	10.309	12.3409	6.9821	9.0601	2.4027	10.9232	7.5091	376	1	3.9636
TCGA.86.6851.01	10.8565	12.3514	4.537	10.5628	2.8612	10.792	2.3183	179	0	3.43779
TCGA.86.7701.01	9.7408	11.9612	5.1177	11.007	2.3827	10.7046	6.6446	947	0	3.48012
TCGA.86.7711.01	10.5252	12.0806	6.6799	9.099	2.7206	10.014	9.8006	1046	1	3.8554
TCGA.86.7713.01	9.5579	12.5013	4.0135	7.979	1.866	11.1742	5.8398	1157	0	3.85415
TCGA.86.7714.01	10.1478	12.2526	4.3072	9.5795	2.731	10.1565	8.4066	625	1	3.64241
TCGA.86.7953.01	10.3236	11.9817	7.7963	9.2883	2.3607	10.8016	5.7753	997	0	3.82837
TCGA.86.7954.01	10.8894	11.8856	6.6632	9.2214	2.401	10.6161	6.1135	605	0	3.77137
TCGA.86.7955.01	9.3197	12.1477	5.0932	7.4144	0.6803	11.7251	3.0408	1072	0	3.82017
TCGA.86.8054.01	8.9874	12.4882	4.8567	7.7888	1.8735	11.5242	5.6426	1148	0	3.96899
TCGA.86.8055.01	10.8	11.9768	6.8933	9.5895	3.0508	10.8511	5.6645	124	1	3.83699
TCGA.86.8056.01	10.0696	12.1039	5.0235	8.6739	5.3882	10.5813	4.2491	139	0	3.91608
TCGA.86.8073.01	10.2467	12.2734	6.2135	9.0553	3.98	11.6203	5.1584	740	0	4.11488
TCGA.86.8074.01	10.9872	11.8323	6.9536	9.2141	3.7172	10.7854	4.9385	24	0	3.89162
TCGA.86.8075.01	11.5057	12.1621	8.091	9.4879	3.0751	10.5874	9.6855	694	1	4.09325
TCGA.86.8076.01	9.8518	12.3978	5.0082	9.9008	1.8986	11.4755	4.4626	993	0	3.68268
TCGA.86.8278.01	10.6324	12.2579	7.0409	9.6033	3.2168	11.1975	5.2897	944	0	3.93957
TCGA.86.8279.01	11.1076	12.3509	7.1887	8.8125	1.8745	10.9485	13.6045	949	0	4.29681
TCGA.86.8280.01	10.8599	12.2173	6.0459	9.8731	3.853	11.1616	7.1127	701	0	4.00357
TCGA.86.8358.01	9.5615	12.169	5.149	8.4748	3.1631	10.7407	7.2747	653	0	3.91074
TCGA.86.8359.01	10.4939	12.1659	7.8266	9.5867	1.497	11.0249	6.4574	444	1	3.82362
TCGA.86.8585.01	10.9999	13.4033	7.1736	9.4697	2.436	12.0437	2.9292	353	0	4.08972
TCGA.86.8668.01	9.9259	12.0268	3.6898	12.7763	5.4645	10.8144	3.7707	423	0	3.37869
TCGA.86.8669.01	10.1527	11.9799	5.8664	9.7907	1.8158	10.35	3.7658	938	0	3.40461
TCGA.86.8671.01	10.6627	12.3076	5.613	10.8445	4.3424	10.6941	8.6075	839	0	3.8706
TCGA.86.8672.01	11.2602	12.459	9.4503	9.9642	3.7521	11.2235	2.9873	19	1	4.0039
TCGA.86.8673.01	10.4922	12.321	6.594	9.4731	3.5307	11.8818	2.176	862	0	3.97178
TCGA.86.8674.01	10.4072	13.2535	7.0502	7.6275	2.303	11.699	4.3697	806	0	4.24443
TCGA.86.A456.01	10.1956	11.6899	8.9036	9.3557	4.4397	10.831	3.3873	896	0	3.92831
TCGA.86.A4D0.01	9.3363	12.2075	5.5709	8.6431	2.0899	14.1582	5.128	116	1	4.51874
TCGA.86.A4JF.01	9.8752	12.5036	7.0648	8.9379	2.4408	10.6429	6.1937	737	1	3.8493
TCGA.86.A4P7.01	10.1869	12.1022	5.0139	10.0268	4.542	11.0104	6.2105	415	0	3.87757
TCGA.86.A4P8.01	10.1947	12.0453	3.7826	10.2991	4.8708	11.246	5.0402	805	0	3.80731
TCGA.90.6837.01	11.3178	12.3887	8.1038	9.6014	5.0435	11.5924	5.1654	758	0	4.29248
TCGA.90.7766.01	9.8472	12.3499	6.5845	9.2045	1.6919	11.1797	5.0936	289	0	3.78318
TCGA.90.7767.01	9.373	12.4023	5.8261	13.5986	3.2317	11.1345	13.2946	89	0	3.73413
TCGA.90.7769.01	10.8456	12.8044	9.8594	11.1678	1.0498	11.5858	6.5232	358	0	3.90037
TCGA.90.7964.01	10.3552	13.1051	8.9133	8.4855	3.3714	11.544	5.1506	428	0	4.32038
TCGA.90.A4ED.01	10.0552	12.7888	4.6218	11.3554	5.8589	12.5027	11.7642	615	0	4.50424
TCGA.90.A4EE.01	10.3296	12.6238	6.9857	12.5668	3.1924	10.7792	5.5861	688	0	3.50827
TCGA.90.A59Q.01	9.6346	12.1996	7.8284	10.9643	4.2741	11.9204	9.2617	322	1	4.23439
TCGA.91.6828.01	9.8771	11.9171	5.0438	9.1823	1.8177	10.4762	4.5685	323	0	3.48965
TCGA.91.6829.01	10.6465	12.2588	7.1956	9.2494	2.847	10.3495	7.2158	1258	1	3.84825
TCGA.91.6830.01	10.5834	11.7347	7.4381	9.4222	4.9488	10.4252	6.696	60	0	3.98018
TCGA.91.6831.01	10.3304	12.2201	4.9941	9.6308	2.4933	10.8316	8.2309	310	0	3.80694
TCGA.91.6835.01	10.2408	11.8428	4.4441	10.1055	3.3897	10.449	7.1252	79	0	3.6228
TCGA.91.6836.01	10.7217	11.7716	9.1967	8.3295	1.8666	11.5477	8.8294	417	0	4.29782
TCGA.91.6840.01	10.7087	13.2804	5.1758	8.8557	3.4506	10.4664	9.3436	372	0	4.07316
TCGA.91.6847.01	10.2082	12.5621	7.2394	7.3707	1.2454	11.7306	12.0354	842	0	4.50493
TCGA.91.6848.01	10.296	11.8197	10.9981	11.316	3.3522	11.5215	9.8252	224	0	4.19397
TCGA.91.6849.01	10.0558	12.7098	8.5455	9.2275	2.94	11.1356	5.7051	35	0	4.0547
TCGA.91.7771.01	9.715	11.8222	6.8562	11.1971	3.1699	10.769	7.9231	492	0	3.68358
TCGA.91.8496.01	9.6773	12.0999	4.5989	7.3197	3.6572	10.432	6.6678	505	0	3.96396
TCGA.91.8497.01	10.0051	12.4697	4.5549	11.0858	3.8973	11.095	6.6385	434	1	3.73118
TCGA.91.8499.01	9.0394	12.1957	3.6117	6.5598	0.6698	11.3264	4.9043	36	0	3.83642
TCGA.91.A4BC.01	10.5938	12.1462	5.8689	10.6041	4.3168	11.3646	4.0012	44	0	3.82693
TCGA.91.A4BD.01	9.0866	12.3762	4.7708	8.3105	1.4612	10.6742	4.2121	603	0	3.58345
TCGA.92.7340.01	10.0431	12.6332	8.7237	9.7171	3.5968	10.918	7.9271	82	0	4.11592
TCGA.92.7341.01	9.7918	12.1164	9.6385	8.8181	3.1662	11.2376	3.8374	106	0	4.05074
TCGA.92.8063.01	9.643	13.3071	10.8415	8.5806	5.0319	11.0232	4.5477	122	0	4.39271
TCGA.92.8064.01	10.4394	11.8983	9.5761	10.3342	2.3418	11.1907	3.7955	160	0	3.78315
TCGA.92.8065.01	10.2951	12.3701	8.097	10.8069	2.9493	10.7363	2.9493	70	0	3.59125
TCGA.93.7347.01	9.7765	12.3939	5.972	10.8039	3.5702	9.8146	5.8315	683	0	3.44329
TCGA.93.7348.01	10.2197	12.134	7.4267	10.4415	4.1302	10.97	7.1124	531	0	3.94965
TCGA.93.8067.01	10.6269	12.6836	8.5286	8.5682	2.3985	12.0213	6.2571	186	0	4.34512
TCGA.93.A4JN.01	11.2258	12.2997	7.278	9.8237	3.7515	11.4163	9.8941	718	0	4.28328
TCGA.93.A4JO.01	10.8467	12.319	5.8186	10.2114	3.5186	11.3149	4.1055	33	1	3.8165
TCGA.93.A4JP.01	11.0774	11.8356	4.7245	9.9951	4.8689	10.977	8.3458	578	0	4.01003
TCGA.93.A4JQ.01	10.4591	12.0584	7.2421	10.618	5.2499	10.925	3.8593	526	0	3.85566
TCGA.94.7033.01	10.4568	12.8964	11.6033	8.0907	3.0421	12.0709	8.4948	640	0	4.75107
TCGA.94.7557.01	10.1803	12.5828	9.4084	7.9802	3.0395	11.2835	4.1914	5	1	4.21377
TCGA.94.7943.01	10.6443	12.2787	6.59	8.1963	4.4327	11.2896	7.7873	559	0	4.34796
TCGA.94.8035.01	10.696	12.8382	9.8399	7.502	1.9692	11.6155	3.6624	122	0	4.29125
TCGA.94.8490.01	11.1469	11.7568	10.1159	7.6409	1.4143	11.643	2.6808	153	0	4.12188
TCGA.94.8491.01	10.4643	13.4442	8.8027	10.6629	0.6128	10.9948	6.7675	810	0	3.77621
TCGA.94.A4VJ.01	10.8621	12.5672	8.5575	8.5281	5.9934	11.525	4.0598	430	0	4.4587
TCGA.94.A5I4.01	10.0907	11.7537	10.0884	13.6265	1.7186	11.9791	2.868	491	0	3.46826
TCGA.94.A5I6.01	10.4484	13.1358	8.3498	8.0178	3.9863	11.485	4.4004	538	0	4.36127
TCGA.95.7039.01	11.3812	12.3477	9.9413	9.1573	2.8931	10.3922	4.4406	1272	0	3.91455
TCGA.95.7043.01	9.9122	13.174	3.5818	8.3638	2.8621	10.5825	4.2501	503	1	3.73082
TCGA.95.7562.01	10.7806	12.2967	5.0386	8.6616	2.0503	10.8493	3.5573	87	1	3.68479
TCGA.95.7567.01	10.8096	12.267	6.4581	9.4512	0.3576	11.4884	2.9011	568	0	3.62279
TCGA.95.7944.01	10.8968	12.6585	8.077	12.7668	4.0964	11.729	10.8968	377	0	4.14025
TCGA.95.7947.01	10.328	11.8929	3.4302	8.5696	1.1521	10.6884	2.8302	477	0	3.4029
TCGA.95.7948.01	10.7685	12.3472	4.5865	10.7952	1.8606	11.0683	6.9157	476	0	3.60801
TCGA.95.8039.01	10.2814	11.7886	4.497	9.4143	4.7452	11.2446	3.3021	830	0	3.83448
TCGA.95.8494.01	11.0395	11.6837	9.1209	8.1848	2.7519	11.5304	2.8823	84	0	4.10241
TCGA.95.A4VK.01	10.9484	11.9474	5.5805	8.7933	2.8767	12.149	5.8112	651	0	4.17324
TCGA.95.A4VN.01	11.0315	12.2421	9.2757	9.6185	2.9905	10.8432	3.9838	553	0	3.89576
TCGA.95.A4VP.01	10.9202	13.1529	7.412	10.0793	4.2343	11.5866	6.2169	605	0	4.22312
TCGA.96.7544.01	9.9891	12.9134	6.6708	12.7168	1.9604	10.5714	8.2061	2160	1	3.44918
TCGA.96.7545.01	9.6548	11.7481	7.782	10.7526	3.5878	10.9577	10.5222	1736	1	3.98756
TCGA.96.8169.01	10.8173	12.5877	9.598	8.9155	3.2327	11.5472	6.0673	557	0	4.31158
TCGA.96.8170.01	10.9994	13.0375	8.2016	8.6215	3.6131	11.5244	5.9679	531	0	4.348
TCGA.96.A4JK.01	10.5381	11.8586	10.3272	11.6108	1.9271	11.8131	10.1845	589	0	4.09317
TCGA.96.A4JL.01	9.9828	12.2105	5.3469	11.2836	2.3726	11.7523	5.905	842	0	3.70358
TCGA.97.7546.01	10.0625	11.7974	8.2165	10.2059	3.3034	10.1863	9.7769	1285	0	3.84919
TCGA.97.7547.01	9.9712	12.1325	6.4965	8.9581	2.742	10.7564	5.135	1965	0	3.79362
TCGA.97.7552.01	9.8806	11.9941	6.0262	10.3722	2.2389	10.0304	5.5979	1932	0	3.38495
TCGA.97.7553.01	11.0271	11.938	6.904	10.805	3.6563	10.5441	7.7532	1870	0	3.78259
TCGA.97.7554.01	11.6053	12.2922	5.9432	9.8249	3.808	10.4911	4.9076	775	0	3.76886
TCGA.97.7937.01	10.102	12.0826	7.0917	8.1222	2.7279	10.6337	1.141	564	0	3.69839
TCGA.97.7938.01	10.3077	12.4885	8.1332	9.3495	3.57	10.2701	6.1017	18	1	3.88176
TCGA.97.7941.01	10.298	12.8306	7.5242	9.4106	5.0595	10.8998	5.6014	484	0	4.13731
TCGA.97.8171.01	10.6549	11.6348	3.9377	6.7323	1.2656	11.2394	3.2366	568	0	3.80566
TCGA.97.8172.01	10.0649	12.5339	4.3999	9.7244	4.5378	11.1333	7.3079	545	0	3.99808
TCGA.97.8174.01	10.4733	11.9243	3.8495	9.6086	5.7651	11.1218	8.5757	164	1	4.12382
TCGA.97.8175.01	11.7579	12.5946	6.5256	8.9213	2.2709	11.499	2.9921	551	0	3.94408
TCGA.97.8176.01	10.8316	12.2786	8.4091	8.3682	1.4771	11.657	3.8754	468	1	4.04692
TCGA.97.8177.01	10.6777	12.6804	7.189	9.0864	3.3606	10.9502	8.1125	499	0	4.14104
TCGA.97.8179.01	10.3436	12.4965	5.9614	9.0132	3.9769	10.7616	3.9769	435	0	3.86603
TCGA.97.8547.01	10.92	11.7358	6.4772	9.9389	4.1581	11.0751	4.537	657	0	3.85937
TCGA.97.8552.01	9.9864	12.0643	5.1353	10.1409	4.0218	11.1369	5.6017	626	0	3.80992
TCGA.97.A4LX.01	10.7446	11.9633	6.8775	10.5943	3.0069	10.8096	3.9558	614	0	3.61265
TCGA.97.A4M0.01	10.0465	12.2032	4.5456	11.1169	5.3139	10.5162	4.3657	652	0	3.58688
TCGA.97.A4M1.01	10.3471	12.5058	4.1804	8.9452	4.6984	11.0749	5.5398	601	0	4.00476
TCGA.97.A4M2.01	10.4208	12.0934	5.2872	10.092	4.8547	11.1811	5.6195	624	0	3.93359
TCGA.97.A4M3.01	9.5549	12.5945	10.277	8.5025	2.7146	11.0639	5.2061	540	0	4.13569
TCGA.97.A4M5.01	10.4409	12.8215	5.2738	9.7779	4.1834	11.6224	6.9211	634	0	4.14154
TCGA.97.A4M6.01	10.394	11.8766	6.5577	9.6241	3.9653	11.0712	6.0517	568	0	3.94688
TCGA.97.A4M7.01	10.7725	12.4507	5.1448	11.3326	5.5931	11.3314	6.3913	629	0	3.96461
TCGA.98.7454.01	10.1881	12.032	7.1626	10.7356	3.6334	11.3169	10.6896	652	0	4.10411
TCGA.98.8020.01	11.341	13.0321	9.9672	10.8111	4.5244	12.3515	6.8034	84	1	4.5104
TCGA.98.8021.01	10.7708	12.7332	8.6752	12.3354	3.3254	11.6978	11.8133	937	0	4.18963
TCGA.98.8022.01	10.5515	13.0435	8.65	9.5569	3.2861	11.6416	6.2686	933	1	4.25116
TCGA.98.8023.01	9.9339	12.6465	8.4894	9.6698	3.2915	11.2002	5.5332	649	0	4.0274
TCGA.98.A538.01	10.6814	12.8157	8.38	8.5282	1.8378	11.526	1.9791	826	0	3.97408
TCGA.98.A539.01	10.9673	12.4624	11.055	8.5409	4.6201	12.6548	5.0408	173	0	4.77012
TCGA.98.A53A.01	11.0826	11.8904	7.2238	11.2209	1.9818	12.3126	9.6657	552	1	4.10919
TCGA.98.A53B.01	10.8001	12.3173	8.5891	8.7474	4.0559	10.6372	8.4832	61	1	4.2349
TCGA.98.A53C.01	10.739	12.0626	8.4144	11.3849	5.3283	11.2496	7.693	822	0	4.10856
TCGA.98.A53D.01	11.3086	12.2545	11.1627	10.6926	6.2785	11.5221	7.5545	645	1	4.51871
TCGA.98.A53H.01	10.5027	12.2884	7.8432	10.603	4.2286	11.0888	8.445	618	0	4.07981
TCGA.98.A53I.01	10.0204	12.4215	7.4216	9.9905	2.8003	11.2677	9.5436	565	0	4.08759
TCGA.98.A53J.01	10.8962	11.4401	9.5578	8.657	2.7457	12.0522	7.7673	630	0	4.40589
TCGA.99.7458.01	9.8604	11.4269	5.0778	10.2732	3.0502	9.8612	5.3478	747	0	3.32241
TCGA.99.8025.01	10.3158	12.0718	8.0348	9.3775	2.5846	11.2374	3.874	1060	0	3.86844
TCGA.99.8028.01	10.38	12.0807	7.4792	10.6961	3.6085	11.0599	5.3893	1118	0	3.81177
TCGA.99.8032.01	9.5908	12.3573	7.1074	9.7467	3.4815	11.3598	7.9278	44	0	4.08309
TCGA.99.8033.01	10.6084	11.6594	9.7416	9.3456	3.2621	12.4438	4.9024	656	1	4.33871
TCGA.99.AA5R.01	10.0662	12.0145	5.4558	10.3953	4.8148	11.1759	5.2855	658	0	3.86198
TCGA.J1.A4AH.01	10.0377	12.7471	7.9638	9.2338	1.881	12.1238	6.783	581	0	4.21856
TCGA.J2.8192.01	10.8805	11.7857	6.4362	11.031	3.6162	11.1102	5.2683	739	0	3.7217
TCGA.J2.8194.01	10.2557	12.3814	7.3546	8.7603	2.4225	10.9469	5.075	724	0	3.90727
TCGA.J2.A4AD.01	10.7356	12.0532	5.716	8.1036	3.5804	11.5795	3.6752	550	1	4.08705
TCGA.J2.A4AE.01	10.7163	11.6306	7.8326	9.7458	4.2273	11.1358	2.6597	1079	0	3.86174
TCGA.J2.A4AG.01	10.5885	11.838	9.1377	9.6207	3.9666	10.8465	8.086	988	0	4.12908
TCGA.L3.A4E7.01	11.1519	12.6755	9.2468	11.8504	3.7313	12.0455	3.8776	392	0	4.01813
TCGA.L3.A524.01	9.5488	11.8687	10.1982	7.7408	2.9249	11.5921	8.3214	490	1	4.46164
TCGA.L4.A4E5.01	11.2978	11.8468	8.1615	8.4476	3.27	10.9048	3.27	578	0	3.96458
TCGA.L4.A4E6.01	10.5367	12.1352	6.6912	10.2982	4.539	10.8745	6.8176	435	0	3.94421
TCGA.L9.A443.01	9.7626	12.4354	7.3059	8.9793	4.9692	10.7908	4.3684	193	1	4.02645
TCGA.L9.A444.01	11.0922	12.162	6.3485	10.5144	2.8226	10.8382	4.2648	307	0	3.63247
TCGA.L9.A50W.01	10.408	12.3571	4.2197	8.6074	2.2484	10.88	1.5239	442	1	3.56469
TCGA.L9.A5IP.01	10.4827	13.0379	10.2605	8.7988	2.6458	11.9104	6.0219	58	1	4.41342
TCGA.L9.A743.01	10.8084	11.9407	8.6335	10.5884	3.2477	11.0872	4.3475	664	0	3.811
TCGA.L9.A7SV.01	10.9077	12.5218	4.8909	7.7167	1.8641	11.3183	3.0298	565	0	3.88551
TCGA.L9.A8F4.01	10.3374	12.6472	5.4063	10.1542	2.2523	11.885	3.8464	476	0	3.81487
TCGA.LA.A446.01	10.5823	11.8515	8.6929	10.4617	2.7773	11.5585	1.6283	401	0	3.74706
TCGA.LA.A7SW.01	10.8649	14.1525	12.6902	12.1022	5.0179	12.1516	5.872	408	1	4.51865
TCGA.MF.A522.01	10.2286	12.5725	9.5795	7.8434	0.89	11.2273	4.8867	360	1	4.06098
TCGA.MN.A4N1.01	10.8655	12.7767	8.0399	7.371	3.5611	11.626	4.0333	827	0	4.38731
TCGA.MN.A4N4.01	12.0168	12.9164	7.2329	9.4173	3.9904	11.4255	3.591	1175	0	4.1302
TCGA.MN.A4N5.01	11.3494	12.1691	9.063	9.2112	3.0155	10.9788	2.6131	84	0	3.90895
TCGA.MP.A4SV.01	10.8709	12.1661	8.5642	13.5905	1.834	11.194	3.9173	2620	1	3.33874
TCGA.MP.A4SW.01	10.5687	12.2371	7.3294	9.2968	3.2011	11.0871	3.4618	1778	1	3.8686
TCGA.MP.A4SY.01	10.8923	12.0496	9.0346	9.7031	3.6655	11.0515	9.5804	1501	1	4.23987
TCGA.MP.A4T4.01	10.8421	12.0882	9.0492	10.2809	2.9573	11.2852	5.3952	2617	1	3.95538
TCGA.MP.A4T6.01	10.6647	12.4566	6.1845	8.3775	2.8523	11.2167	2.9236	1790	1	3.9171
TCGA.MP.A4T7.01	10.8059	12.9855	8.7738	9.2922	3.6403	12.7506	3.3594	167	1	4.45067
TCGA.MP.A4T8.01	11.1641	12.2909	8.2726	8.1606	3.414	12.1503	4.6157	161	1	4.41551
TCGA.MP.A4T9.01	11.4597	12.4201	7.8454	9.7348	3.901	11.6297	6.4695	1265	1	4.23905
TCGA.MP.A4TA.01	9.9929	12.2007	9.118	8.7643	2.8195	11.2747	6.0094	950	1	4.13065
TCGA.MP.A4TC.01	10.6881	13.0443	9.6355	9.5774	4.3936	11.0263	3.2	74	1	4.10842
TCGA.MP.A4TD.01	10.1966	12.1191	5.9568	10.2762	3.7881	11.5846	6.6233	307	1	3.98465
TCGA.MP.A4TE.01	10.9773	12.795	4.2189	8.0706	1.4658	10.8864	3.784	896	1	3.7317
TCGA.MP.A4TF.01	11.7019	12.4938	8.4415	9.0508	2.9117	13.1239	10.0517	336	1	4.81153
TCGA.MP.A4TH.01	9.9572	12.6884	4.6694	10.1269	4.8417	11.0411	5.8628	741	0	3.90637
TCGA.MP.A4TI.01	10.6113	12.3654	10.0917	10.6023	5.4944	11.5868	3.9403	429	1	4.2194
TCGA.MP.A4TJ.01	10.0551	12.3327	6.6139	10.8146	3.283	10.8762	6.9354	339	1	3.76333
TCGA.MP.A4TK.01	11.6488	12.456	7.8225	9.6112	4.5719	10.8769	5.5412	582	1	4.10019
TCGA.MP.A5C7.01	10.3284	11.507	5.0604	7.7546	2.111	11.2522	4.2675	2248	0	3.84618
TCGA.NC.A5HD.01	9.7038	12.0616	8.8789	7.3976	1.9451	11.835	8.9604	2	1	4.45838
TCGA.NC.A5HE.01	10.5077	12.4187	7.5978	10.0334	2.3883	10.7971	6.5509	2336	0	3.81311
TCGA.NC.A5HF.01	11.7139	12.7899	10.7669	7.1898	2.4553	12.1981	2.4553	138	1	4.54067
TCGA.NC.A5HG.01	11.0397	12.4323	8.192	13.1746	0.4857	11.5805	6.6876	1963	0	3.50419
TCGA.NC.A5HH.01	9.0619	12.4954	7.0686	12.6099	2.2857	11.6356	8.0475	37	0	3.68429
TCGA.NC.A5HI.01	10.9028	12.3419	7.403	7.3875	2.2074	11.406	3.392	1743	0	4.10732
TCGA.NC.A5HJ.01	9.8061	12	5.7236	9.9255	3.3689	11.4062	8.7174	418	1	4.01
TCGA.NC.A5HK.01	10.7737	11.9383	9.3468	10.1467	2.5412	11.9719	10.486	128	0	4.34802
TCGA.NC.A5HL.01	9.4646	11.0317	7.7038	8.8096	1.8148	12.1247	7.9321	88	1	4.13653
TCGA.NC.A5HM.01	9.7715	12.5841	10.6137	12.2477	3.2752	11.0973	2.8008	1212	0	3.64905
TCGA.NC.A5HN.01	10.8416	11.9654	11.216	11.5184	1.1506	11.9801	3.5327	1499	0	3.81086
TCGA.NC.A5HO.01	9.8086	12.2505	8.5406	7.9608	4.2628	10.8252	8.8941	1336	0	4.36407
TCGA.NC.A5HP.01	10.3533	11.5547	9.0652	8.8802	5.1066	11.7275	5.4656	770	1	4.36879
TCGA.NC.A5HQ.01	10.2281	12.0889	10.238	12.9981	4.8773	11.0126	5.4609	448	1	3.77658
TCGA.NC.A5HR.01	9.8871	11.469	8.3122	7.9171	0.6612	10.9851	5.5345	1244	0	3.83189
TCGA.NC.A5HT.01	11.0947	12.3442	9.6744	11.1225	1.9369	11.708	5.7177	804	0	3.94001
TCGA.NJ.A4YF.01	10.7662	12.1343	6.1094	7.5968	2.6933	11.0287	4.9146	2161	0	4.02306
TCGA.NJ.A4YG.01	10.2955	12.4784	7.7222	9.6554	3.51	11.498	3.435	2261	0	3.9798
TCGA.NJ.A4YI.01	10.368	12.6306	6.2516	9.9609	3.1789	10.2838	3.5536	4	1	3.56871
TCGA.NJ.A4YP.01	10.9693	12.4178	7.3085	9.9036	3.5131	11.8045	4.7366	50	0	4.0906
TCGA.NJ.A4YQ.01	9.1269	12.3151	4.4407	10.2106	2.0492	10.9455	3.9484	1432	0	3.43998
TCGA.NJ.A55A.01	9.8615	12.2588	4.4582	10.2471	4.2749	10.7962	7.0835	15	0	3.78916
TCGA.NJ.A55R.01	10.1034	12.7499	5.1828	8.6329	3.6751	11.1282	6.9062	603	0	4.0885
TCGA.NJ.A7XG.01	10.1679	12.1171	6.3423	9.5695	0.938	11.1972	2.5939	617	0	3.53134
TCGA.NK.A5CR.01	10.2788	11.7834	9.4381	12.469	0.737	11.6917	3.4594	2542	0	3.45517
TCGA.NK.A5CT.01	11.5644	13.5565	9.2793	7.7752	1.6378	12.4497	3.3184	1997	0	4.48065
TCGA.NK.A5CX.01	11.2662	12.8406	8.7214	12.4498	3.9701	11.0549	8.1898	111	0	3.93559
TCGA.NK.A5D1.01	10.681	12.2834	6.015	11.4214	1.4606	11.3603	13.3868	511	0	3.94712
TCGA.NK.A7XE.01	9.9068	12.9736	8.6111	7.4341	4.645	10.4743	3.4743	13	0	4.18135
TCGA.O1.A52J.01	10.8359	12.3485	6.1947	9.3481	3.1912	9.9603	2.7531	1798	1	3.52012
TCGA.O2.A52N.01	10.4623	12.4943	9.27	7.9573	5.8262	12.6679	3.3631	1006	1	4.76442
TCGA.O2.A52Q.01	11.1207	12.6588	11.8582	8.7843	2.5779	11.8727	4.5464	113	1	4.40258
TCGA.O2.A52S.01	9.429	12.7828	8.9615	8.4526	1.1646	11.8844	10.5357	387	1	4.40154
TCGA.O2.A52V.01	10.0389	12.5286	8.7241	10.6528	2.3791	11.0715	7.6957	1335	1	3.90559
TCGA.O2.A52W.01	10.8228	12.4373	7.0861	11.5401	2.2514	12.6131	2.9974	261	1	3.86722
TCGA.O2.A5IB.01	9.2193	12.3763	4.1516	6.4735	1.7639	11.0842	5.8306	340	1	3.98669
TCGA.S2.AA1A.01	10.0522	11.945	6.2041	10.4578	3.818	10.8327	3.6015	513	0	3.62749
TCGA.XC.AA0X.01	10.7993	11.7601	10.258	9.9787	4.1879	11.7171	5.9799	6	1	4.26999
