# Supplementary material for: Transcriptomic analysis reveals a WNT signaling pathway-based gene signature prognostic for non-small cell carcinoma
Source: Aging (Albany NY). 2020 Oct 7;12(19):19159–72. doi: 10.18632/aging.103724 (PMC7732286; doi:10.18632/aging.103724)
Supplement: Supplementary Table 2 [file aging-12-103724-s003..xlsx]

## Sheet: data_2__exp_profile
sample	PPARD	PPP2R1A	FOSL1	CCND2	CAMK2A	CSNK1E	SFRP1	OS	OS_IND	riskscore
GSM1465989	5.28034	8.50956	5.00705	5.52614	4.9763	6.69553	4.23374	221	0	2.81348
GSM1465993	5.3246	8.66766	6.88213	6.47567	4.79441	7.59756	4.47568	95	1	3.01971
GSM1465994	5.45815	8.84792	6.48492	6.39305	4.5194	7.3671	4.24399	34	1	2.93853
GSM1465998	5.95372	8.82131	8.06569	6.01553	4.85282	7.90228	4.39084	200	0	3.24951
GSM748053	5.59608	8.84041	4.46929	5.55997	4.6155	7.29271	4.11636	121	0	2.92785
GSM748054	6.00966	9.34095	6.8289	5.28205	4.56767	7.33464	4.57204	21	1	3.16905
GSM748055	5.79844	8.39476	4.21372	5.16533	4.7956	6.4149	4.10272	86	1	2.73902
GSM748056	5.32858	9.14131	4.9365	6.41204	4.8735	7.33309	4.81213	12	1	2.93047
GSM748057	5.05432	8.06698	4.83209	6.56845	5.69393	7.40587	4.42312	195	1	2.87737
GSM748058	5.19505	8.65722	4.43034	5.62347	4.73425	6.74653	4.19094	68	0	2.76915
GSM748059	5.76638	8.85288	6.31048	4.59601	4.58812	7.36171	4.70661	52	1	3.18891
GSM748061	5.77678	9.25221	8.77418	5.52809	5.03272	7.61039	6.55342	70	1	3.42694
GSM748062	6.12833	8.80903	7.3116	7.39346	4.98769	7.73824	6.2281	115	0	3.11496
GSM748063	5.66411	9.12032	6.12842	5.97536	4.60553	7.71351	5.0373	72	1	3.13343
GSM748064	5.07634	8.92039	4.6681	5.49345	4.71782	6.99312	4.27859	118	0	2.87617
GSM748065	5.41109	9.30133	5.74989	5.97868	4.50431	8.01452	4.39054	104	1	3.14936
GSM748066	5.49782	8.72948	9.04924	5.17477	4.79891	6.76396	4.10162	5	1	3.08134
GSM748067	5.19462	9.20476	5.67757	7.5613	4.8185	7.89021	4.28303	218	0	2.93068
GSM748068	5.66032	9.05921	4.29473	5.77879	4.82088	6.83345	4.15435	87	0	2.82487
GSM748071	5.50813	9.15029	5.81169	5.50972	4.88177	7.45755	4.53435	51	0	3.10923
GSM748072	5.34356	9.08114	5.56969	5.39608	4.74172	7.27431	4.2801	134	0	3.02832
GSM748074	5.13647	9.02943	5.90559	5.92089	4.85361	7.43806	4.31118	54	0	3.01961
GSM748075	5.76859	9.04229	5.1982	5.54739	4.56198	6.4263	4.23984	34	1	2.78417
GSM748076	5.10762	9.13444	5.47183	7.26764	4.99282	7.89581	4.65025	228	1	2.98181
GSM748077	5.3638	8.86189	5.57483	5.61115	4.81705	7.12331	4.73644	20	1	2.97801
GSM748078	5.20637	8.90126	3.85545	5.54495	4.80077	6.87669	4.15171	58	0	2.80644
GSM748079	5.71574	8.94608	4.64507	6.09133	4.62188	6.95632	4.26909	29	1	2.81401
GSM748080	5.39353	8.87469	5.3134	5.84857	4.66501	6.97431	4.18789	64	0	2.86151
GSM748081	5.36656	8.9739	6.39954	4.8666	4.88862	6.92866	4.30095	102	0	3.05795
GSM748083	5.52533	9.2558	5.32185	5.85386	4.74036	6.81824	4.22364	8	1	2.87085
GSM748084	5.63242	9.14435	6.54708	6.49626	4.63504	7.91644	4.33047	71	1	3.10867
GSM748085	5.05305	9.195	5.29472	5.68485	4.9921	7.64443	4.56427	89	1	3.1028
GSM748086	5.03955	8.80772	4.53968	5.18501	4.77106	7.12384	4.24802	131	0	2.93063
GSM748087	5.02058	8.61114	4.54553	5.79104	4.84077	7.16676	4.06193	101	0	2.84753
GSM748088	5.57492	8.80037	7.15537	5.2462	4.82899	7.69532	4.14252	170	0	3.21464
GSM748089	5.39557	8.90584	5.88064	6.31525	4.86751	6.97753	4.25198	25	1	2.85913
GSM748090	5.12949	8.86205	5.54777	6.27862	4.84517	7.24217	4.19531	88	0	2.8902
GSM748091	5.23118	8.60988	5.46902	5.10819	4.86453	6.9368	5.65541	84	0	3.01143
GSM748092	5.5572	9.0285	4.75623	5.49731	4.68903	6.88522	4.41772	116	0	2.88832
GSM748093	5.25153	8.81893	6.44886	7.03961	4.55995	7.56465	4.41042	44	1	2.90642
GSM748094	5.4796	8.89825	5.65476	6.16542	4.79692	6.86451	4.4673	108	1	2.8458
GSM748095	5.50286	8.64491	6.64741	5.56781	4.70423	8.11877	4.15348	55	0	3.22416
GSM748097	5.81829	8.71228	7.29181	7.61485	4.44772	8.29428	5.24027	55	0	3.0999
GSM748098	5.34137	8.73575	7.38243	8.03628	4.67266	7.97996	5.07525	111	1	2.97242
GSM748099	5.14377	8.72484	5.40939	5.59043	4.69627	7.01714	4.73332	76	1	2.91419
GSM748100	5.51095	9.21239	5.54674	5.90058	4.92908	7.06033	4.07122	46	1	2.94029
GSM748101	5.325	8.90902	4.66338	6.00003	4.6507	6.89303	4.29097	175	1	2.79466
GSM748102	5.213	9.09043	5.32319	6.29095	4.75853	7.25924	4.59493	203	0	2.91621
GSM748103	5.29128	8.82512	4.45785	5.91933	4.66935	6.73084	4.65279	59	0	2.76616
GSM748104	5.21394	8.74986	4.97873	5.08816	4.72592	7.21295	4.57931	74	1	3.00054
GSM748105	5.4234	8.82382	6.78202	6.27047	5.06501	7.92016	4.2264	124	1	3.14729
GSM748106	5.31128	9.00059	5.42927	7.60997	4.71133	7.01842	6.00866	199	0	2.76602
GSM748108	5.38451	9.0167	5.22115	6.65845	4.70547	7.20013	4.44128	62	0	2.84094
GSM748109	5.49385	9.03222	6.81952	7.13851	5.05351	7.37812	4.24061	139	1	2.93457
GSM748110	5.93904	9.27851	7.3586	5.14953	4.96435	7.81673	4.28121	52	0	3.34158
GSM748111	5.97822	9.05678	5.96557	5.87035	4.77148	7.56249	4.23268	25	1	3.08551
GSM748112	5.37625	9.26404	6.58597	5.77119	4.67438	7.85352	4.76092	31	1	3.20748
GSM748113	6.18811	8.71283	4.85597	4.7039	4.83593	6.8044	6.20393	90	1	3.07197
GSM748115	5.27358	9.10407	7.14101	6.27731	4.73413	7.78909	4.86767	17	1	3.1515
GSM748116	5.52872	9.4783	5.93142	6.32965	4.9015	8.02138	4.30778	40	1	3.1707
GSM748117	5.56593	9.22974	7.15335	5.03635	4.69028	7.28399	4.32501	11	1	3.17371
GSM748119	5.63532	8.97059	5.60208	5.48845	4.74735	7.70551	4.50169	220	0	3.13667
GSM748120	5.16793	8.58034	5.97964	6.93408	4.72767	7.05773	7.8187	45	1	2.93385
GSM748121	5.1392	9.2242	4.78604	5.75128	4.8748	7.22821	4.49785	85	0	2.96132
GSM748122	5.69819	8.97008	5.55408	5.74735	4.80475	7.70983	4.35232	113	0	3.10456
GSM748123	5.86678	9.34725	5.06917	5.84474	4.71751	7.42359	4.54218	12	1	3.04038
GSM748124	5.32223	8.81724	5.06163	5.84539	5.00575	8.31981	4.22793	81	0	3.19748
GSM748125	5.34074	8.32032	6.33214	6.08186	4.85748	7.16917	4.17691	56	0	2.89912
GSM748126	5.53518	9.29658	4.7677	5.66988	4.89281	8.03794	4.24723	69	0	3.17684
GSM748127	5.25616	9.17275	6.23719	6.24037	4.66444	7.25308	5.7594	52	1	3.02454
GSM748128	5.48385	8.84604	4.73586	6.51625	4.88279	7.14354	4.48021	72	0	2.82823
GSM748130	5.44138	9.13831	4.89182	4.9426	4.6645	7.76614	4.24017	14	1	3.16687
GSM748131	5.47479	9.032	5.44453	6.06635	4.97457	6.77094	4.28105	13	1	2.84332
GSM748132	5.71968	8.70094	7.56948	6.73755	5.06252	7.66615	4.18202	1	1	3.06934
GSM748133	5.45755	9.16509	6.75089	6.83608	4.88209	7.3535	4.6086	256	0	2.97383
GSM748134	5.27596	8.69529	4.81987	5.81232	4.72636	6.70013	4.69236	0	1	2.78553
GSM748135	5.31148	9.25074	5.30713	5.40084	4.68559	7.48914	4.73867	175	0	3.09651
GSM748136	5.37958	8.53258	7.49587	7.99724	4.76763	7.20158	4.71553	84	1	2.77165
GSM748137	5.11231	9.40923	4.70976	5.72826	4.96942	7.15687	4.13428	49	0	2.94867
GSM748138	5.46846	8.66801	5.29809	5.56348	4.75296	7.03968	4.40315	38	1	2.91531
GSM748139	5.37267	8.86206	5.33468	6.44194	4.91423	7.72678	4.37807	150	1	3.00173
GSM748140	5.29954	9.51509	5.27073	5.09746	4.58123	7.55753	4.95283	28	1	3.17073
GSM748141	5.69359	9.41635	5.83252	7.81873	4.64559	7.48543	4.05612	124	1	2.82246
GSM748142	5.22925	8.83589	4.61181	6.29828	4.58694	6.5976	4.07832	99	0	2.65834
GSM748143	5.41043	9.24404	6.66811	5.72164	4.66829	8.29648	4.16392	127	1	3.29354
GSM748145	5.63821	9.18628	6.88867	5.53	4.49497	6.90915	4.09852	80	0	2.98077
GSM748146	5.7738	8.6654	4.94607	5.86732	5.01972	8.35197	4.39013	18	1	3.21241
GSM748147	5.16682	8.42897	4.43208	5.4269	4.88732	7.25024	4.3839	117	0	2.91686
GSM748148	5.29091	9.00225	6.17328	6.21728	4.69022	6.75989	4.1885	68	1	2.81769
GSM748150	5.01788	8.76103	4.56194	6.05775	4.52779	7.33545	5.26146	56	0	2.89926
GSM748151	5.46777	9.09184	5.48197	5.60532	4.76521	7.74981	5.23434	57	1	3.16806
GSM748152	5.29407	9.0435	4.93991	6.44283	4.743	7.66949	4.44712	177	0	2.96757
GSM748154	5.32352	8.56659	7.53759	4.85178	4.60266	7.79492	4.34949	40	1	3.26396
GSM748155	5.13137	9.01253	5.4952	5.97466	4.8798	7.57971	5.47396	12	1	3.08452
GSM748156	5.36266	9.00781	8.05863	5.33038	4.72832	7.20473	4.1125	16	1	3.13014
GSM748157	5.07626	9.44057	5.57016	5.14194	4.7521	7.55395	4.54985	137	0	3.15965
GSM748159	5.27067	9.01825	7.85168	6.75955	4.7625	7.62366	4.20343	59	0	3.0517
GSM748161	5.20742	8.92327	4.64545	5.3654	4.80809	6.88863	4.36715	175	1	2.88412
GSM748162	5.25739	8.70045	4.93805	5.97012	4.54294	7.04424	4.13447	89	0	2.80992
GSM748163	5.05758	8.58895	6.44792	6.11649	4.6462	6.99797	4.42594	89	1	2.86314
GSM748164	5.07011	8.75357	4.46022	5.2846	4.61408	6.5483	4.25719	61	0	2.75912
GSM748165	5.3145	9.21384	5.50511	6.01947	4.62454	7.19267	4.743	32	1	2.95203
GSM748166	5.31867	8.84247	5.8769	6.28139	5.08258	7.00315	4.74299	65	0	2.90472
GSM748167	5.11039	9.04065	4.69438	5.25496	4.60817	7.07781	4.24952	123	0	2.92677
GSM748169	5.26243	8.81658	4.67098	6.01179	4.96191	7.11987	4.58712	129	0	2.88099
GSM748170	5.56251	8.97399	4.90732	6.9665	4.77659	7.2714	4.43519	2	1	2.8152
GSM748171	5.28945	9.19849	5.23729	5.305	4.6393	7.09556	5.3228	13	1	3.02936
GSM748172	5.81048	8.67782	7.66418	4.56813	4.89859	7.62684	4.25057	62	0	3.31744
GSM748173	5.55635	8.93783	5.94195	5.84065	4.43898	7.55928	4.22898	14	1	3.02777
GSM748175	5.78502	8.75664	6.24116	6.57557	4.82941	7.70429	4.45079	134	0	3.03025
GSM748177	5.30103	8.83934	6.7309	5.20075	4.95522	7.60999	4.51076	80	0	3.19978
GSM748178	5.26544	8.38962	5.09692	5.24036	4.62804	6.71887	4.40505	0	1	2.82337
GSM748179	6.16519	9.60351	8.50751	4.73248	4.92537	6.91002	4.13505	11	1	3.25926
GSM748180	5.17317	8.44006	4.37713	5.81228	4.6602	6.54263	4.09665	100	0	2.66369
GSM748181	5.21743	8.37793	4.61174	6.22972	4.85431	6.78129	4.35537	51	0	2.70962
GSM748182	5.19129	9.07714	6.99299	7.51183	4.85775	7.67523	4.52678	33	1	2.95611
GSM748183	5.52946	8.86565	6.81071	6.64232	4.86261	7.62182	4.25604	13	1	3.02294
GSM748185	5.53532	9.19202	6.13831	6.08026	4.69005	8.36163	4.4766	175	0	3.25739
GSM748186	5.58524	9.11772	8.09575	5.93634	4.82716	7.67594	4.00768	22	1	3.19456
GSM748187	5.6321	8.22696	4.70861	6.09995	4.78414	7.0393	4.32009	107	1	2.78869
GSM748188	5.28388	8.94873	4.81105	7.97042	4.87874	7.45121	4.22637	99	1	2.71698
GSM748189	5.62798	8.92315	6.73764	5.99901	4.75357	8.03202	4.87027	21	1	3.22479
GSM748191	5.51369	9.25783	7.04951	6.68625	4.89778	7.22657	4.45932	172	1	2.98102
GSM748192	5.39616	9.16322	6.59009	6.75278	4.57399	8.14032	5.97126	63	0	3.20021
GSM748193	5.29142	8.80236	6.00568	7.49801	4.93373	8.02217	4.31008	12	1	2.96838
GSM748195	5.39939	9.02654	7.01528	5.10121	4.92435	7.63825	4.30062	17	1	3.23991
GSM748209	5.59202	9.08402	4.82571	5.50091	4.73946	6.91936	8.77624	13	1	3.12557
GSM748213	4.99666	9.54684	4.40531	4.7717	4.83759	6.61387	5.61702	14	1	2.98666
GSM748215	4.60459	9.33009	4.4213	4.55381	4.86104	6.66839	4.85047	14	1	2.95595
GSM748218	5.24116	9.463	4.563	4.89623	4.79462	6.32553	5.54876	31	1	2.90637
GSM748219	5.12084	9.8443	4.47823	5.86187	4.82418	7.68702	4.30761	6	1	3.08045
GSM748239	5.25225	9.52222	10.3422	6.05114	4.85064	8.01912	4.39777	4	1	3.4179
GSM748240	5.61486	8.80317	5.5743	4.99051	4.7638	6.85158	4.02594	23	1	2.95374
GSM748242	5.558	8.97301	4.759	5.90659	4.89494	6.89267	6.40014	17	1	2.95297
GSM748243	5.16446	8.73123	4.54113	5.91739	4.92032	7.17533	4.76993	103	1	2.89283
GSM748244	4.42351	11.0039	4.18296	5.65381	4.68215	7.2364	5.9359	28	1	3.11897
GSM748245	5.43222	9.51208	3.90728	3.95467	4.73497	6.56471	5.78384	17	1	3.06309
GSM748246	4.98289	8.39175	4.52898	4.69348	4.50955	7.45856	5.03961	11	1	3.04663
GSM748247	4.78708	9.86221	4.77991	4.82606	5.13356	6.78016	4.65781	19	1	3.03698
GSM748248	4.91224	8.94314	4.26127	6.49224	4.7573	6.68033	4.85633	14	1	2.68681
GSM748249	4.6407	9.24723	4.74528	4.76341	4.61952	7.48829	6.18192	30	1	3.18116
GSM748250	5.48172	8.45825	4.78317	5.38145	4.6078	7.2061	4.77481	77	0	2.93877
GSM748251	5.10597	9.38189	4.5646	5.6338	4.60902	7.17904	6.62906	2	1	3.04506
GSM748252	4.61253	9.32094	4.35788	5.63656	4.62962	7.23769	4.29388	140	0	2.90868
GSM748253	4.55402	10.0096	4.1382	4.98567	4.62013	7.12842	5.94653	11	1	3.08718
GSM748254	5.05633	9.7796	4.32913	4.62304	5.10982	7.02089	5.53137	4	1	3.14193
GSM748255	4.92342	9.59787	5.42534	4.86869	4.98188	6.99373	5.64189	6	1	3.13328
GSM748256	5.26021	8.9476	4.33286	6.48323	4.66366	7.13704	5.29564	54	1	2.82927
GSM748257	5.62515	9.53974	4.60044	5.15431	5.03988	7.02672	5.90381	8	1	3.10847
GSM748258	4.68282	9.29021	4.62904	5.19561	5.05789	7.10938	5.73895	10	1	3.05654
GSM748264	5.05125	8.61777	5.17912	7.31151	4.61929	6.47954	5.20827	42	1	2.56847
GSM748265	4.62429	8.30224	4.57651	5.35459	5.08925	6.89883	6.2179	59	1	2.92385
GSM748271	5.48326	9.20911	4.66729	4.76605	4.84433	6.57524	4.39927	23	1	2.92386
GSM748276	5.90252	8.69676	6.21295	6.3074	4.87932	7.05291	4.27682	55	1	2.90113
GSM748277	5.4588	9.24453	4.76182	4.92603	4.85512	6.84863	4.51454	193	1	2.98346
GSM748278	5.47755	9.30566	4.73822	6.04003	4.94311	7.1356	5.11838	23	1	2.96018
GSM748279	5.4657	9.09361	4.38768	5.25652	4.78056	6.51833	4.53959	205	0	2.82711
GSM748280	5.34564	9.13071	6.68434	5.82748	4.89271	7.57783	4.29923	23	1	3.12437
GSM748281	5.86271	9.50467	7.69212	6.09261	4.70503	6.95669	4.37439	4	1	3.03453
GSM748282	5.56497	8.72672	7.71009	5.2955	4.80636	7.36205	4.09428	13	1	3.14555
GSM748283	5.71905	9.13727	7.27102	5.9595	4.92652	7.44453	4.21622	67	1	3.12164
GSM748284	5.32533	9.0395	6.66697	7.26572	4.83014	7.01441	4.33783	125	1	2.80169
GSM748285	5.71088	9.43194	6.79491	4.79454	4.75692	7.32086	4.85405	22	1	3.24955
GSM748286	6.02168	9.63044	8.08073	6.40991	4.85719	7.93766	4.30372	204	0	3.2791
GSM748287	5.65446	8.89242	6.69947	5.44868	5.05908	7.21941	4.11151	26	1	3.08419
GSM748288	5.53444	9.2415	5.92032	8.1828	4.66357	7.07253	7.88476	13	1	2.85267
GSM748312	5.28123	9.25041	5.91146	5.75954	4.82871	7.03568	6.24005	14	1	3.06093
