# Supplementary material for: Transcriptomic analysis reveals a WNT signaling pathway-based gene signature prognostic for non-small cell carcinoma
Source: Aging (Albany NY). 2020 Oct 7;12(19):19159–72. doi: 10.18632/aging.103724 (PMC7732286; doi:10.18632/aging.103724)
Supplement: Supplementary Table 3 [file aging-12-103724-s004..xlsx]

## Sheet: data_3__exp_profile
sample	PPARD	PPP2R1A	FOSL1	CCND2	CAMK2A	CSNK1E	SFRP1	OS	OS_IND	riskscore
GSM1012828	4.506	11.688	6.843	8.9095	2.868	6.491	4.609	8.5	0	2.50784
GSM1012829	3.488	10.926	6.333	11.2025	2.485	7.28967	5.629	69.5667	1	2.30189
GSM1012830	3.962	11.529	7.497	9.7655	2.293	6.88	4.655	11.3333	1	2.44227
GSM1012831	4.06333	11.946	4.186	8.942	2.907	7.225	6.776	9.5	1	2.65948
GSM1012832	3.82533	10.566	3.459	8.6305	2.848	6.831	4.406	34.6667	1	2.31561
GSM1012833	4.645	11.269	5.166	9.4545	3.655	7.05233	3.787	34.1	1	2.4947
GSM1012834	4.371	11.309	3.991	8.098	2.202	7.07533	2.17	101.533	1	2.38189
GSM1012835	3.95367	10.875	5.138	9.825	2.632	7.14333	5.333	108.7	1	2.38805
GSM1012836	4.18367	9.741	3.982	9.008	2.787	7.43733	3.744	134.233	0	2.34822
GSM1012837	4.105	11.366	5.133	9.641	3.524	7.497	6.349	119.7	0	2.67641
GSM1012838	4.59133	11.162	4.585	10.2715	2.848	6.65933	5.489	89.6	1	2.26972
GSM1012839	4.34967	10.402	8.194	9.8645	2.536	6.72667	4.766	54.4	1	2.37717
GSM1012840	4.189	9.558	2.945	8.3005	2.406	6.14533	6.391	128.933	0	2.15163
GSM1012841	4.00667	10.997	3.561	8.821	2.263	7.12333	3.154	130.4	0	2.29613
GSM1012842	4.109	11.287	4.853	11.904	2.233	7.79067	5.567	131.567	0	2.29337
GSM1012843	3.80667	10.292	3.573	10.5995	3.573	6.54833	6.702	129.433	0	2.17174
GSM1012844	4.524	11.208	3.621	9.776	2.888	7.40733	10.337	34	1	2.70441
GSM1012845	4.53867	10.625	3.202	8.166	2.828	7.04633	5.752	15.0333	1	2.51071
GSM1012846	3.69333	11.027	3.17	9.902	2.07	6.70767	7.412	92.7333	0	2.22715
GSM1012847	3.79867	10.852	5.35	9.291	2.868	7.629	6.368	121.567	0	2.64425
GSM1012848	4.07067	10.886	3.202	9.0855	2.632	6.70267	4.225	28.2333	1	2.22561
GSM1012849	4.40767	10.923	5.379	7.7855	2.678	7.58433	5.947	105.6	1	2.81103
GSM1012850	3.95333	10.704	6.888	8.513	3.07	7.67267	3.926	6.13333	1	2.71877
GSM1012851	4.55267	11.221	6.188	9.4965	2.888	7.064	5.555	22.6333	1	2.55176
GSM1012852	4.41133	10.819	4.096	10.1885	2.379	6.74167	6.022	124.1	0	2.2205
GSM1012853	4.56833	11.279	4.878	10.73	1.888	7.18933	3.121	6.9	0	2.15885
GSM1012854	4.25167	11.45	6.495	11.163	2.406	7.64633	6.939	1.4	0	2.53514
GSM1012855	3.711	10.784	4.53	9.2125	2.945	6.694	3.632	34.7333	1	2.25084
GSM1012856	4.63933	12.043	6.361	8.7795	2.868	7.059	3.963	39.2667	1	2.63959
GSM1012857	3.99267	12.015	6.451	8.972	2.536	6.79033	9.199	33.8333	1	2.75377
GSM1012858	3.98667	10.249	4.667	8.732	3.365	7.284	2.561	14.2667	1	2.40975
GSM1012859	4.147	11.014	3.935	8.862	2.036	7.076	5.289	120.767	0	2.39038
GSM1012860	4.20133	10.81	4.392	9.3745	2.35	7.77667	4.129	3.63333	1	2.47623
GSM1012861	4.507	10.287	5.492	9.591	2.7	6.93067	5.138	22	1	2.35348
GSM1012862	5.32467	11.678	8.906	5.843	6.358	7.557	2.293	13.2333	1	3.48347
GSM1012863	4.173	11.642	7.999	8.8165	2.868	8.14567	2.926	51.0667	1	2.87281
GSM1012864	4.415	11.55	3.121	9.279	2.104	6.91167	9.144	32.1667	1	2.51326
GSM1012865	4.02267	10.518	4.162	9.656	3.336	7.56267	3.744	51.1	1	2.4194
GSM1012866	4.08967	11.132	5.731	9.6195	2.585	6.61267	4.178	115.2	0	2.28202
GSM1012867	4.251	11.819	5.489	8.9975	2.293	7.442	3.406	97.4333	1	2.54426
GSM1012868	4.416	10.136	5	10.5315	3.087	6.504	2.787	108.433	0	2.01571
GSM1012869	4.04733	11.244	4.868	9.3325	3.053	6.93933	4.689	121.933	0	2.42808
GSM1012870	4.50633	10.406	4.695	9.8435	2.585	7.18367	4.744	17.0333	1	2.32336
GSM1012871	4.16767	11.072	7.003	9.9205	2.263	7.19	5.142	83.6333	1	2.46395
GSM1012872	4.12633	10.489	4.853	9.549	2.561	7.03267	4.233	115.167	0	2.29413
GSM1012873	3.91967	10.929	4.087	10.066	2.7	7.604	4.548	0.3	1	2.38704
GSM1012874	4.29	11.23	5.289	9.781	3.233	7.23033	10.838	116.467	0	2.79416
GSM1012875	4.225	10.659	7.233	10.6905	4.154	7.69833	5.94	82.6	1	2.68671
GSM1012876	3.97433	11.724	3.585	11.4715	2.945	7.59033	3.233	116.7	0	2.21639
GSM1012877	4.54167	11.362	4.087	10.7415	2.536	7.91633	7.548	41.7667	1	2.57655
GSM1012878	3.80233	10.289	4.935	10.483	2.379	6.941	5.018	11.8333	1	2.15402
GSM1012879	4.79667	10.991	3.7	9.8405	2.406	7.60267	5.548	62.8	1	2.45941
GSM1012880	4.091	10.661	5.256	9.7055	2.744	7.099	5.365	31.8667	1	2.39746
GSM1012881	4.67633	11.685	7.109	9.2765	3.609	7.172	7.718	33.8333	1	2.86949
GSM1012882	4.35	11.287	6.349	11.4605	2.511	7.26967	6.204	113.433	0	2.36526
GSM1012883	4.936	12.005	7.159	10.9275	3.053	7.512	5.986	91.3667	0	2.65485
GSM1012884	4.97333	11.453	7.005	9.714	3.293	8.775	2.868	5.23333	1	2.91975
GSM1012885	4.28367	12.166	5.495	8.9865	2.678	7.33967	4.406	35.3667	1	2.63757
GSM1012886	4.49833	11.155	6.431	10.2505	2.828	7.455	2.787	89.8	0	2.41631
GSM1012887	4.91333	11.882	7.712	8.6325	2.202	7.49467	2.459	105.967	0	2.69178
GSM1012888	3.72967	10.544	3.935	8.1495	3.766	6.927	4.991	82.0667	1	2.52918
GSM1012889	4.762	12.316	5.396	8.9465	2.35	8.018	2.485	48.1333	1	2.70804
GSM1012890	4.086	11.49	3.755	9.781	2.848	6.989	4.818	24.7333	1	2.33951
GSM1012891	4.659	11.884	4	8.7715	2.485	7.697	2.406	35.3667	1	2.54925
GSM1012892	4.638	11.638	6.534	7.4945	2.263	7.45267	3.17	23.6	1	2.76822
GSM1012893	4.14667	11.363	6.482	9.0655	2.561	7.60667	4.771	0.533333	1	2.67447
GSM1012894	4.09133	13.134	4.542	8.1025	2.536	6.58367	4.209	103.8	0	2.56678
GSM1012895	3.99967	11.114	4.579	9.182	2.888	7.24667	4.892	85.4667	0	2.48693
GSM1012896	4.42233	11.709	6.746	10.9705	2.907	7.67667	8.271	81.5333	0	2.72016
GSM1012897	4.21833	9.61	3.597	9.649	2.406	6.897	3.202	78.1333	0	2.04975
GSM1012898	4.565	11.65	6.586	7.1825	2.907	7.96233	4.873	50.2667	1	3.07266
GSM1012899	4.43367	11.638	10.092	6.5805	2.585	7.903	2.406	26.2667	1	3.14978
GSM1012900	3.93533	10.876	3.848	8.358	2.233	7.58233	10.32	41.1667	1	2.81413
GSM1012901	4.008	11.861	6.912	11.3795	2.536	7.96833	4.807	38.1333	1	2.53867
GSM1012902	4.52433	10.985	5.81	11.1525	2.609	7.057	6.984	77.9333	0	2.35369
GSM1012903	4.33	11.398	6.119	10.1935	2.459	7.44467	4.42	61.6667	1	2.46478
GSM1012904	4.095	10.952	4.672	9.105	3.018	7.23733	3.548	71.7667	1	2.43474
GSM1012905	4.40067	11.972	7.393	8.5355	3.459	8.61667	6.235	4.83333	1	3.24541
GSM1012906	4.45067	11.255	5.828	9.7275	2.926	7.03833	6.32	74.6	1	2.5393
GSM1012907	4.75667	12.188	7.715	7.2065	2.7	7.745	2.585	21.5333	1	2.99658
GSM1012908	3.97933	10.926	4.733	10.845	2.828	7.00667	6.589	68.9	0	2.29702
GSM1012909	4.47467	11.88	5.567	9.2715	2.406	6.72067	5.289	56.2667	1	2.46033
GSM1012910	5.15267	10.601	3.104	7.6115	2.511	6.86733	7.008	28.4667	1	2.58677
GSM1012911	4.946	12.326	8.066	7.4055	2.926	7.81333	3.7	20.6667	1	3.10252
GSM1012912	4.491	12.074	7.248	8.6535	2.379	7.27767	3.818	16.1	1	2.69563
GSM1012913	4.03633	10.452	5.606	10.063	2.379	7.439	6.677	31.8667	1	2.46391
GSM1012914	4.519	11.349	6.298	8.6095	2.787	6.926	4.07	53.6333	1	2.55844
GSM1012915	4.57967	12.336	7.374	11.5535	2.536	7.91833	7.251	77.0333	0	2.71459
GSM1012916	4.60167	11.016	6.977	9.219	2.945	7.062	2.609	9.33333	1	2.4692
GSM1012917	4.06433	10.646	4.858	9.298	2.536	7.50633	3.053	84	0	2.38851
GSM1012918	3.968	10.944	4.986	9.2575	2.485	6.67733	3.406	72.6333	0	2.23512
GSM1012919	4.01	10.645	2.848	8.4615	2.459	6.64533	2.982	67.4667	0	2.16895
GSM1012920	4.129	11.07	5.664	11.691	3.018	7.65867	7.091	0.9	1	2.459
GSM1012921	4.04867	10.642	5.938	10.655	3.233	7.33333	5.98	78.4	0	2.44546
GSM1012922	3.743	10.63	4.744	10.3235	2.609	6.79333	5.921	62.9667	1	2.22083
GSM1012923	4.052	11.057	6.516	10.821	4.121	7.482	8.797	52.4	1	2.74737
GSM1012924	4.76033	10.759	6.375	10.0485	3.379	7.086	6.684	48.6667	1	2.57049
GSM1012925	4.72267	11.242	5.695	9.571	2.744	7.335	3.766	77.4	0	2.49025
GSM1012926	4.45467	11.172	4.42	8.724	2.888	8.26533	6.16	80.1	0	2.86561
GSM1012927	5.08267	11.253	5.909	8.692	2.511	6.951	2.787	67.3333	0	2.46182
GSM1012928	4.96633	12.152	6.752	9.044	2.322	7.31067	2.7	26.6667	1	2.59781
GSM1012929	3.88667	11.709	4.492	8.901	2.406	8.13867	4.567	68.1667	0	2.71547
GSM1012930	5.15167	11.169	3.278	9.734	1.926	7.091	3.104	65.1333	0	2.19352
GSM1012931	5.32533	12.415	7.283	8.4425	2.202	7.92667	2.722	31.4	1	2.87287
GSM1012932	4.361	11.152	5.365	8.803	2.406	6.52167	3.036	75.1667	0	2.28096
GSM1012933	4.83467	11.609	5.186	9.563	2.104	7.78067	2.202	66.0333	0	2.4718
GSM1012934	4.10333	11.026	3.776	10.217	2.511	6.818	4.585	60.4	0	2.16505
GSM1012935	5.179	11.29	6.978	9.7195	3.406	7.57467	4.828	70.3667	0	2.7321
GSM1012936	4.415	11.281	3.689	8.529	2.293	6.784	2.766	68.8	0	2.282
GSM1012937	3.951	11.063	3.7	9.4685	3.053	7.40133	4.129	73.3333	0	2.41625
GSM1012938	4.07467	11.154	4.75	10.0775	2.485	7.33367	5	73.4667	0	2.38243
GSM1012939	4.711	11.331	9.237	8.039	3.121	7.50233	2.868	18.8	1	2.89236
GSM1012940	4.256	11.672	5.52	9.009	2.561	6.91567	7.406	15.8667	1	2.62824
GSM1012941	4.307	11.155	3.433	8.8785	2.233	7.54967	6.613	9.76667	1	2.57919
GSM1012942	3.78467	11.484	5.933	9.7345	3.053	6.71833	6.018	71.4333	0	2.45493
GSM1012943	4.55933	11.703	3.655	9.4295	3.597	7.51667	3.263	63.9667	0	2.53498
GSM1012944	4.391	12.124	6.787	9.553	2.485	7.69267	3	67.5333	1	2.63242
GSM1012945	4.52767	11.83	6.225	6.191	2.536	7.29167	6.363	63.5	0	3.06651
GSM1012946	4.50267	11.371	4.878	9.5855	2.536	7.37833	4.079	48.7667	0	2.45536
GSM1012947	4.353	11.678	6.194	10.712	2.433	7.52567	5.406	59	0	2.49632
GSM1012948	4.13767	11.799	5.781	11.2085	2.766	7.04033	5.632	62.1	0	2.34226
GSM1012949	4.44767	11.238	8.539	5.3265	2.459	7.904	2.945	0.266667	1	3.20487
GSM1012950	4.20333	10.918	8.045	9.986	2.536	6.96167	3.511	71.2333	0	2.38713
GSM1012951	4.23033	11.407	4.868	9.2325	2.744	7.57967	2.744	70.5667	0	2.49073
GSM1012952	3.94433	11.091	4.833	10.0405	2.263	7.04567	5.256	71.6333	0	2.30306
GSM1012953	4.463	11.094	7.696	8.4095	2.744	8.40833	4.233	36.1667	0	2.98838
GSM1012954	4.07467	11.165	5.776	9.1285	2.766	7.43267	6.597	39.6	1	2.67871
GSM1012955	4.544	10.731	6.311	10.561	2	7.492	6.534	39.5667	1	2.45514
GSM1012956	4.06367	11.919	6.71	9.383	2.406	7.284	3.711	4.33333	1	2.54735
GSM1012957	3.93933	11.484	4.036	10.8805	2.722	7.24567	5.597	49.7	0	2.30198
GSM1012958	4.09833	10.614	6.382	10.779	2.807	7.62267	9.17	40.4667	1	2.63971
GSM1012959	3.76633	11.197	4.186	10.2515	3.036	6.75333	3.632	34.6333	1	2.16801
GSM1012960	4.96767	11.414	6.972	9.197	2.655	7.682	2.485	61.4	0	2.63682
GSM1012961	4.59933	11.282	4.062	8.951	2.138	6.93133	3.644	58.7667	0	2.32193
GSM1012962	3.997	10.931	5.396	9.2705	2.138	7.565	5.252	66.2667	0	2.52596
GSM1012963	4.15967	11.117	4.027	10.421	2.379	6.93733	2.561	68.8667	0	2.07964
GSM1012964	5.04167	12.07	6.129	9.733	2.807	7.447	4.858	63.5667	0	2.6635
GSM1012965	4.313	12.052	5.263	11.1465	2.233	7.19933	5.209	67.7333	0	2.32041
GSM1012966	4.24667	10.857	4.511	10.415	3.138	7.323	4.766	63.3667	0	2.35819
GSM1012967	4.54567	11.875	4.233	9.7885	2.787	7.46733	3.776	35.6667	1	2.47287
GSM1012968	4.56367	11.343	6.257	9.86	2.322	7.33167	3.459	41.1333	1	2.43019
GSM1012969	3.761	11.275	4.787	8.727	2.293	7.04233	5.615	66.1	0	2.48735
GSM1012970	4.08133	11.792	4.959	10.133	3.248	7.45833	4.113	45.7	0	2.49813
GSM1012971	4.118	11.214	3.897	9.274	2.678	7.476	2.632	61.8	0	2.37893
GSM1012972	5.15333	11.365	2.511	9.466	2.379	7.591	6.661	59.5667	0	2.54165
GSM1012973	4.36467	12.229	7.178	8.484	2.766	7.22367	3.35	57.1667	0	2.72041
GSM1012974	4.24667	10.869	6.754	10.7675	3.548	7.04333	7.496	46.4333	0	2.53546
GSM1012975	4.78933	11.64	6.901	9.9255	2.561	7.92867	3.278	57.4	0	2.64619
GSM1012976	4.03367	11.16	4.413	10.322	2.888	6.59333	6.414	50.0667	1	2.26438
GSM1012977	3.75133	10.575	5.755	8.7265	3.07	7.028	4.536	17.1	1	2.49166
GSM1012978	4.38867	11.517	8.608	9.6475	2.322	6.90233	3.379	60.1667	0	2.47495
GSM1012979	4.56633	10.77	5.895	10.1075	2.561	7.32967	6.231	52.0333	0	2.4917
GSM1012980	4.42567	11.598	9.592	10.319	2.787	8.34133	3.036	64.7	0	2.82308
GSM1012981	4.31833	11.745	5.018	11.453	2.7	7.99767	2.485	29.6	1	2.34538
GSM1012982	4.148	10.564	4.684	9.018	2.202	6.936	3.406	59.1	0	2.25985
GSM1012983	4.86	10.895	5.062	8.0235	2.807	7.07033	3.087	40.4	0	2.53089
GSM1012984	5.298	12.152	7.434	8.7465	2.828	7.87267	2.379	50.7667	0	2.84843
GSM1012985	5.27733	10.809	7.382	6.2085	2.379	8.03733	2.926	43.8	0	3.06226
GSM1012986	3.977	10.88	4.307	10.6375	2.379	7.25167	3.293	58.6667	0	2.15095
GSM1012987	4.47667	11.532	6.15	9.641	2.766	7.312	4.684	53.4667	0	2.56076
GSM1012988	4.914	11.259	7.471	10.2755	4.162	7.33467	4.644	0.5	1	2.67936
GSM1012989	4.54933	11.754	4.426	8.8015	2.678	6.69067	4.977	45.1333	1	2.45487
GSM1012990	4.22533	11.157	5.492	9.755	2.17	7.023	6.3	40.4	1	2.42598
GSM1012991	4.245	11.707	8.036	6.864	2.678	7.57267	9.041	45.9333	0	3.26644
GSM1012992	4.044	10.726	6.282	10.5945	2.888	6.93	5.755	22.6667	1	2.33721
GSM1012993	3.985	11.361	5.361	10.027	2.585	7.48367	4.44	50.1333	0	2.45082
GSM1012994	3.702	10.975	3.087	7.7685	1.926	7.19967	5.928	7.93333	1	2.50855
GSM1012995	3.90233	10.44	4.178	10.9555	3.186	6.56067	3.322	0.466667	1	1.97604
GSM1012996	4.289	11.025	4.07	9.3655	3.632	7.828	4.036	14.6667	1	2.61021
GSM1012997	4.292	11.801	4.931	9.7705	2.036	7.599	2.766	53.6667	0	2.40489
GSM1012998	4.65633	11.642	8.371	7.888	3	7.32567	2.459	7.7	1	2.81739
GSM1012999	4.10067	10.697	5.43	10.8695	2.632	7.25	4.603	34.4	1	2.25695
GSM1013000	4.17333	11.808	3.278	10.4095	5.453	7.16233	2.907	51.3333	0	2.4599
GSM1013001	4.05033	10.848	3.406	10.134	2.406	7.553	4.079	39.1667	0	2.28043
GSM1013002	4.394	10.888	6.464	11.5205	2.036	7.42267	3.379	47.3333	0	2.18468
GSM1013003	4.11067	11.4	6.935	9.928	2.848	7.07833	3.278	35.5	0	2.42086
GSM1013004	4.287	11.582	4.626	12.4445	2.744	7.39567	12.056	14.0333	1	2.52236
GSM1013005	4.124	11.888	6.582	8.435	2.536	7.92333	3.018	12.6	1	2.78679
GSM1013006	4.305	10.754	4.146	9.9595	2.585	7.58967	4.146	15.1333	1	2.37053
GSM1013007	3.87267	11.027	4.263	9.938	2.536	7.57633	5.591	17.1	0	2.44734
GSM1013008	4.55767	11.077	2.982	8.7165	2.585	6.838	2.926	43.4	0	2.26036
GSM1013009	4.26233	11.275	3.104	9.494	2.744	7.01167	4.17	50.9	0	2.29442
GSM1013010	4.55167	11.775	5.036	9.798	2.7	7.86767	4.315	31.5333	0	2.6184
GSM1013011	4.48367	11.614	5.828	7.787	2.17	6.996	2.807	39.4667	0	2.55249
GSM1013012	4.24667	10.149	3.138	8.896	2.35	7.469	3.138	50.9667	0	2.29378
GSM1013013	4.787	11.572	6.743	9.3055	2.561	8.83267	3.036	36.2	0	2.91217
GSM1013014	4.312	11.743	5.539	8.9095	2.787	7.566	6.293	5.06667	1	2.77173
GSM1013015	4.145	12.103	7.718	8.751	2.379	9.21767	3.536	9.43333	1	3.14631
GSM1013016	4.05067	10.527	5.81	9.9205	2.511	7.098	6.728	50	0	2.43153
GSM1013017	4.036	10.961	7.667	11.3215	2.433	7.538	5.621	50.5667	0	2.43555
GSM1013018	4.47167	11.125	3.7	9.771	2.322	7.54267	3.807	35.7667	0	2.35722
GSM1013019	5.20333	11.695	6.601	9.0305	2.379	7.52367	4.129	46.5667	0	2.68986
GSM1013020	3.89	11.439	5.498	12.3435	2.655	7.56933	4.036	23.9	0	2.18692
GSM1013021	4.02267	10.18	3.511	8.462	2.678	6.69033	3.916	49.0667	0	2.24042
GSM1013022	4.73033	10.481	4.797	10.233	2.406	6.88833	5.036	16.6333	1	2.2243
GSM1013023	4.254	10.976	5.146	6.221	2.585	7.479	3.121	6.36667	1	2.8133
GSM1013024	3.90767	10.798	4.036	11.071	3.365	7.256	3.733	47.1667	0	2.18931
GSM1013025	4.82167	12.293	5.117	9.9945	2.828	7.30433	4.162	34.0667	1	2.52381
GSM1013026	4.03433	11.234	4.678	9.0125	2.35	7.17567	3.644	43.6	0	2.39551
GSM1013027	3.591	10.499	6.517	9.231	2.907	7.847	5.202	8.8	1	2.66967
GSM1013028	5.319	11.16	5.579	9.23	3.897	8.44267	2.787	43.9	0	2.86879
GSM1013029	4.57233	11.875	6.847	8.5595	2.926	9.27133	3.609	18.3667	1	3.19181
GSM1013030	4.74967	12.197	9.522	7.8255	2.585	8.40567	2.907	36.6667	0	3.17678
GSM1013031	4.06133	10.99	6.356	10.6825	2.766	7.20067	4.194	44.2667	0	2.33008
GSM1013032	4.63633	12.525	7.954	7.466	3.828	6.911	3.597	5.13333	1	2.95579
GSM1013033	3.62833	11.059	5.76	8.908	2.787	6.73933	6.785	38.6667	0	2.52143
GSM1013034	4.111	11.433	3.087	10.0485	1.848	7.003	4.293	21.9333	0	2.15403
GSM1013035	4.363	11.076	5.343	9.993	3.186	7.444	3.053	24.2333	0	2.42388
GSM1013036	4.89367	10.909	5.863	9.2835	3.263	7.24167	2.888	28.2	1	2.49504
GSM1013037	4.03467	11.039	5.382	7.9965	2.982	7.31233	2.678	4.86667	1	2.58131
GSM1013038	4.46767	10.943	6.559	11.5325	3.433	7.60067	4.433	33.3333	0	2.42056
GSM1013039	4.65967	12.08	7.386	11.8235	3.632	7.69033	3.104	33.2333	0	2.50677
GSM1013040	3.994	10.391	5.84	8.8425	3.17	6.96267	4.365	31.2333	0	2.46181
GSM1013041	4.51067	11.544	4.271	8.2755	2.036	6.91667	4.336	31.1	0	2.45397
GSM1013042	4.07867	10.47	3.217	10.5835	3.036	7.242	4.307	20.1333	0	2.18073
GSM1013043	3.92333	10.62	5.94	10.1535	2.379	7.04133	3.524	29.8667	0	2.22838
GSM1013044	4.41067	10.867	5.027	10.1865	2.907	7.13167	3.954	20.2667	0	2.31234
GSM1013045	4.46333	10.873	6.982	10.1255	2	7.47767	6.728	29.2	0	2.55651
GSM1013046	4.30067	10.422	7.065	7.239	3.897	7.37767	3.138	28.7667	0	2.84013
GSM1013047	3.82667	11.215	2.787	10.0985	5.812	7.70967	5.501	28.8333	0	2.69992
GSM1013048	4.41533	11.597	3.678	9.7915	2.293	6.80767	6.142	2.1	0	2.32783
GSM1013049	3.68167	11.05	4.548	9.795	2.982	7.196	7.392	27.4	0	2.512
GSM1013050	4.05967	11.417	6.954	11.103	2.293	7.48067	3.036	11.6333	1	2.31167
GSM1013051	3.48333	11.588	6.474	11.336	2.848	7.601	6.127	25.2	0	2.48215
GSM1013052	4.437	11.052	7.365	8.8555	3.17	8.096	12.199	18.2	1	3.27084
GSM1013053	3.96333	11.008	5.84	9.2305	2.744	7.087	2.926	13.5667	0	2.38534
GSM1013054	4.137	11.281	5.744	11.5215	3.154	7.58333	2.828	23.4	0	2.28615
GSM1013055	3.954	11.276	4.883	9.9425	2.379	7.06133	9.691	20.6333	0	2.56706
GSM1013056	4.29333	11.258	6.327	7.4	2.202	7.027	8.84	25.7333	0	2.89407
GSM1013057	4.19467	11.623	6.824	9.7635	2.722	7.48767	4.096	17.5	0	2.5846
GSM1013058	3.90067	10.639	3.322	8.115	2.322	6.38233	6.881	22.6	1	2.34622
GSM1013059	4.243	10.669	3.667	10.11	2.485	6.909	3.907	25.4	0	2.13396
GSM1013060	4.525	11.632	2.807	7.648	3.138	6.809	4.138	18.9667	1	2.53122
GSM1013061	3.918	10.186	3.916	9.976	2.963	6.86167	5.739	24.7	0	2.23109
GSM1013062	4.41133	11.788	8.043	11.1	2.585	7.272	3.379	8.76667	1	2.40778
GSM1013063	4.03667	10.948	4.062	9.332	3.104	7.22867	9.275	14.2	0	2.66218
GSM1013064	3.81367	10.135	5.209	8.176	2.511	6.48333	3.818	19.4	0	2.27787
GSM1013065	4.116	11.039	2.766	8.3655	2.104	6.52767	7.803	14.6667	1	2.39129
GSM1013066	5.29233	10.153	7.321	9.079	2.485	6.70867	3.667	20.4	0	2.38414
GSM1013067	4.092	9.747	3.498	7.9015	2.433	6.79967	5.096	14	0	2.33528
GSM1013068	4.28833	10.81	7.326	10.1805	2.485	6.72733	5.603	22.6667	0	2.36406
GSM1013069	3.767	10.506	3.597	9.1265	2.104	6.15867	2.722	1.1	0	1.94138
GSM1013070	3.83667	10.309	5.426	10.144	2.632	7.239	4.853	1.1	0	2.30984
GSM1013071	3.56367	11.311	7.409	9.1385	2.459	6.77467	3.42	20.1	0	2.40731
GSM1013072	3.84933	11.616	5.358	8.85	2.828	7.14833	2.138	4.76667	0	2.43777
GSM1013073	3.55867	10.543	2.848	8.0265	2.888	6.65533	7.063	19.2	0	2.43726
GSM1013074	3.736	10.688	3.548	9.8575	3.104	7.21733	6.174	19.6667	0	2.38179
GSM1013075	4.37767	10.433	5.921	9.253	2.655	6.64367	3.365	18.1667	0	2.26248
GSM1013076	3.73733	10.633	5.354	9.5785	3.248	6.695	5.248	20.2667	0	2.34449
GSM1013078	4.198	10.76	5.736	8.8885	2.485	7.43867	3.248	23.2333	1	2.4865
GSM1013082	4.08267	10.883	3.954	10.2355	3.278	6.97133	4.44	50.1	0	2.25966
GSM1013083	4.17867	11.018	3.897	8.4695	3.018	7.34	5.807	8.83333	1	2.61792
GSM1013084	3.93733	10.727	7.77	8.64	2.233	7.18367	3.365	4.96667	1	2.52635
GSM1013087	3.914	10.917	3.678	9.8795	2.379	6.60433	6.74	42.6	0	2.22638
GSM1013088	4.78367	11.185	4.307	8.99	2.104	7.344	3.744	36.5333	0	2.42988
GSM1013090	4.066	10.676	4.883	9.0985	2.926	6.79733	5.009	33.2333	0	2.37941
GSM1013091	4.01567	11.01	3.511	8.531	2.322	7.49267	3.511	10.1667	1	2.44187
GSM1013093	3.63933	10.371	5.539	8.054	3.35	7.204	12.29	32.4667	0	2.99086
GSM1013096	4.19833	10.702	5.036	9.379	3.138	7.40167	3.524	17.5	1	2.45238
GSM1013097	4.485	11.294	6.387	9.3345	2.678	7.51067	3.498	22.3	0	2.57078
GSM1013098	4.24133	10.89	4.667	8.3135	2.787	6.856	2.7	6.9	1	2.37655
GSM1013099	4.05567	11.082	3.17	9.749	3.561	7.231	4.24	16.5333	0	2.37358
GSM1013101	5.45433	11.845	6.194	10.735	2.945	8.56567	10.113	7.76667	1	3.08427
GSM1013102	4.85867	11.073	3.973	10.6845	2.35	7.58433	4.07	37.8333	0	2.2981
