# Supplementary material for: Transcriptomic analysis reveals a WNT signaling pathway-based gene signature prognostic for non-small cell carcinoma
Source: Aging (Albany NY). 2020 Oct 7;12(19):19159–72. doi: 10.18632/aging.103724 (PMC7732286; doi:10.18632/aging.103724)
Supplement: Supplementary Table 4 [file aging-12-103724-s005..xlsx]

## Sheet: data_4__exp_profile
sample	PPARD	PPP2R1A	FOSL1	CCND2	CAMK2A	CSNK1E	SFRP1	OS	OS_IND	riskscore
GSM1032881	4.72	10.76	4.63	8.845	4.1	7.37333	5.22	33.6	1	2.69031
GSM1032882	5.50333	11.46	5.71	9.66	4.77	7.61	4.85	33.6	1	2.84027
GSM1032883	5.27667	11.5	4.98	8.325	3.35	7.61667	3.29	120	1	2.75129
GSM1032884	4.92333	11.07	5.7	10.025	3.89	7.67333	5.84	106.8	1	2.71954
GSM1032885	5.11667	9.94	4.97	9.225	4.04	7.87333	4.82	132	0	2.70299
GSM1032886	5.04	11.55	5.69	9.845	4.68	8.05	6.67	117.6	0	2.99159
GSM1032887	5.43667	11.35	5.34	10.465	4.11	7.22667	5.96	88.8	1	2.61335
GSM1032888	5.27667	10.6	8.41	10.065	3.78	7.25667	5.45	54	1	2.69702
GSM1032889	5.09333	9.76	4.2	8.53	3.62	6.80333	6.71	127.2	0	2.52962
GSM1032890	4.97333	11.19	4.71	9.03	3.43	7.67333	4.41	128.4	0	2.68913
GSM1032891	5.04333	11.47	5.5	12.07	3.39	8.34333	6.02	129.6	0	2.62411
GSM1032892	4.76	10.49	4.72	10.795	4.72	7.13333	6.99	127.2	0	2.52489
GSM1032893	5.41	10.82	4.44	8.39	4.1	7.60667	6.17	14.4	1	2.87336
GSM1032894	4.63333	11.22	4.42	10.105	3.17	7.26667	7.65	91.2	0	2.57051
GSM1032895	5.01	11.08	4.45	9.295	3.87	7.26	5.11	27.6	1	2.6125
GSM1032896	5.21667	11.12	5.87	8.015	3.94	8.01333	6.32	104.4	1	3.0982
GSM1032897	4.86667	10.9	7.16	8.73	4.32	8.21	4.94	6	1	3.05729
GSM1032898	5.27	11.01	5.04	10.385	3.56	7.30333	6.39	122.4	0	2.56015
GSM1032899	5.44	11.47	5.52	10.92	2.87	7.74	4.37	7.2	0	2.50694
GSM1032900	5.18333	11.63	6.8	11.35	3.61	8.14	7.2	1.2	0	2.82647
GSM1032901	4.62	10.98	5.3	9.42	4.21	7.26333	4.76	34.8	1	2.63013
GSM1032902	5.49	12.21	6.68	8.99	4.13	7.62	4.96	38.4	1	2.98205
GSM1032903	4.92	10.45	5.38	8.94	4.57	7.84333	3.8	14.4	1	2.78507
GSM1032904	5.07	11.21	4.95	9.07	3.14	7.63667	5.81	118.8	0	2.73555
GSM1032905	5.38667	10.49	5.96	9.79	3.95	7.49	5.7	21.6	1	2.68619
GSM1032906	5.28667	11.73	4.37	9.485	3.2	7.47	9.35	31.2	1	2.85005
GSM1032907	4.94667	10.72	5.08	9.86	4.55	8.08	4.82	50.4	1	2.78795
GSM1032908	4.92333	11.32	6.15	9.825	3.84	7.17667	5.08	114	0	2.62658
GSM1032909	5.13	11.99	5.96	9.205	3.46	7.99	4.59	96	1	2.89358
GSM1032910	5.31667	10.34	5.6	10.73	4.34	7.05667	4.05	106.8	0	2.38939
GSM1032911	5.01	11.43	5.51	9.535	4.32	7.50333	5.4	120	0	2.7813
GSM1032912	5.35333	10.61	5.4	10.04	3.82	7.67667	5.44	16.8	1	2.65631
GSM1032913	5.08667	11.26	7.26	10.12	3.41	7.75333	5.7	82.8	1	2.77754
GSM1032914	4.96	10.69	5.5	9.75	3.8	7.59	5.12	114	0	2.648
GSM1032915	5.18667	11.42	5.81	9.985	4.47	7.78667	11.03	115.2	0	3.10836
GSM1032916	5.16	10.86	7.48	10.885	5.07	8.21667	6.32	81.6	1	2.96113
GSM1032917	4.9	11.9	4.72	11.65	4.21	8.12333	4.47	115.2	0	2.61327
GSM1032918	5.35667	11.55	5.04	10.935	3.77	8.3	7.78	40.8	1	2.87044
GSM1032919	4.74333	10.49	5.56	10.68	3.59	7.50667	5.61	12	1	2.49671
GSM1032920	5.60333	11.18	4.8	10.04	3.62	8.12667	6.01	62.4	1	2.80284
GSM1032921	5.01667	10.86	5.78	9.91	4	7.65	5.86	31.2	1	2.72921
GSM1032922	5.52667	11.86	7.36	9.485	4.74	7.71667	7.94	33.6	1	3.15508
GSM1032923	5.25667	11.47	6.67	11.64	3.74	7.82333	6.54	111.6	0	2.67789
GSM1032924	5.7	12.17	7.41	11.12	4.32	8.06667	6.36	90	0	2.96038
GSM1032925	5.40333	11.34	6.74	10.45	4.1	7.99	4.06	88.8	0	2.77179
GSM1032926	5.73667	12.05	7.94	8.845	3.35	8.01333	3.67	104.4	0	3.01812
GSM1032927	4.70333	10.74	4.94	8.39	4.84	7.49667	5.59	80.4	1	2.8753
GSM1032928	5.67667	12.47	5.88	9.155	3.55	8.55	3.71	48	1	3.05923
GSM1032929	5.06667	11.55	6.79	9.275	3.8	8.16	5.45	0	1	3.00151
GSM1032930	4.96667	11.3	5.33	9.39	4.16	7.80667	5.53	84	0	2.84106
GSM1032931	5.12333	9.81	4.73	9.85	3.62	7.45667	4.44	76.8	0	2.44667
GSM1032932	4.85	11.07	4.89	8.58	3.38	8.12333	10.52	40.8	1	3.14189
GSM1032933	4.96667	12.03	7.18	11.56	3.76	8.52	5.47	37.2	1	2.86475
GSM1032934	5.44	11.18	6.21	11.34	3.86	7.61667	7.24	76.8	0	2.67029
GSM1032935	5.24333	11.58	6.46	10.39	3.68	8.00333	5.23	61.2	1	2.80041
GSM1032936	5.05	11.14	5.39	9.31	4.28	7.79667	4.7	70.8	1	2.8115
GSM1032937	5.31	12.14	7.63	8.75	4.64	9.14333	6.57	4.8	1	3.53741
GSM1032938	5.36667	11.44	6.23	9.93	4.19	7.6	6.64	73.2	1	2.85819
GSM1032939	5.35	12.05	6.02	9.475	3.62	7.28	5.81	55.2	1	2.78336
GSM1032940	5.99333	10.8	4.37	7.92	3.76	7.46333	7.27	27.6	1	2.93833
GSM1032941	5.68	12.48	8.28	7.67	4.19	8.36	4.8	20.4	1	3.42886
GSM1032942	5.34	11.53	6.62	8.82	4.05	7.47333	5.02	52.8	1	2.89548
GSM1032943	5.49667	12.49	7.61	11.73	3.78	8.46333	7.5	75.6	0	3.0163
GSM1032944	5.01333	10.84	5.51	9.505	3.79	8.02	4.31	82.8	0	2.75545
GSM1032945	4.91667	11.14	5.59	9.465	3.7	7.2	4.59	72	0	2.59466
GSM1032946	4.93667	10.84	4.12	8.68	3.69	7.16667	4.26	66	0	2.56563
GSM1032947	4.77	10.83	5.43	10.52	3.86	7.30667	6.3	62.4	1	2.55093
GSM1032948	4.99667	11.25	6.82	11.01	5.05	8.01	9	51.6	1	3.01985
GSM1032949	5.60333	11.43	6.12	9.77	4.02	7.89	4.84	76.8	0	2.8462
GSM1032950	5.83333	11.44	6.29	8.91	3.72	7.51667	4.06	66	0	2.81372
GSM1032951	5.86667	12.32	7.03	9.255	3.49	7.86667	3.95	26.4	1	2.9429
GSM1032952	5.83	11.36	4.5	9.935	2.91	7.64667	4.36	64.8	0	2.56296
GSM1032953	5.15	11.34	5.86	9.01	3.62	7.1	4.29	74.4	0	2.64424
GSM1032954	5.66333	11.79	5.73	9.765	3.22	8.23333	3.35	64.8	0	2.79479
GSM1032955	5.05667	11.22	4.85	10.415	3.73	7.38333	5.33	60	0	2.53841
GSM1032956	5.87333	11.48	7.24	9.925	4.6	8.13	5.49	69.6	0	3.04334
GSM1032957	5.28667	11.47	4.79	8.745	3.47	7.35667	4.04	68.4	0	2.67457
GSM1032958	4.82	11.25	4.8	9.675	4.31	7.93333	5.05	72	0	2.78991
GSM1032959	5.03333	11.34	5.44	10.275	3.72	7.85667	5.6	72	0	2.72022
GSM1032960	5.50333	11.52	9.44	8.265	4.38	8.06	4.14	18	1	3.23896
GSM1032961	4.97667	11.85	5.98	9.22	3.81	7.46	7.64	15.6	1	2.93026
GSM1032962	5.45333	11.88	4.77	9.635	4.73	8.03667	4.49	63.6	0	2.91041
GSM1032963	5.35667	12	6.56	6.56	3.78	7.85333	6.68	62.4	0	3.35484
GSM1032964	5.34667	11.56	5.52	9.79	3.78	7.83667	5.03	48	0	2.78787
GSM1032965	5.22	11.86	6.53	10.9	3.66	8.07333	5.89	57.6	0	2.81258
GSM1032966	5.06	11.97	6.19	11.39	4.04	7.56333	6.07	61.2	0	2.66061
GSM1032967	5.22	11.43	8.75	5.845	3.68	8.43667	4.22	0	1	3.50647
GSM1032968	5.14333	11.11	8.26	10.19	3.77	7.52	4.67	70.8	0	2.73585
GSM1032969	5.06667	11.59	5.51	9.44	4.01	8.09667	4.01	69.6	0	2.85369
GSM1032970	4.89	11.28	5.49	10.24	3.39	7.60333	5.78	70.8	0	2.63315
GSM1032971	5.22333	11.28	7.92	8.62	4.01	8.70667	5.12	36	0	3.25578
GSM1032972	5.41	10.93	6.64	10.76	3.07	8.04667	6.83	39.6	1	2.74891
GSM1032973	4.87	11.67	5.01	11.07	3.98	7.8	6.04	49.2	0	2.65576
GSM1032974	5.02	10.81	6.7	10.975	4.07	8.12667	9.37	39.6	1	2.9365
GSM1032975	5.87	11.6	7.23	9.405	3.91	8.2	3.7	60	0	2.98015
GSM1032976	4.93333	11.12	5.88	9.475	3.26	8.10667	5.78	64.8	0	2.84222
GSM1032977	5.06667	11.31	5	10.615	3.57	7.49667	3.81	68.4	0	2.46714
GSM1032978	5.80667	12.24	6.47	9.935	4.08	7.95333	5.51	62.4	0	2.97558
GSM1032979	5.2	12.22	5.79	11.33	3.37	7.68	5.74	67.2	0	2.62439
GSM1032980	5.19	11.05	5.29	10.61	4.39	7.84	5.45	62.4	0	2.705
GSM1032981	5.33667	12.05	5.12	9.99	4.06	8.01	4.85	34.8	1	2.84361
GSM1032982	5.46333	11.53	6.59	10.06	3.5	7.88	4.64	40.8	1	2.77666
GSM1032983	4.75667	11.46	5.46	8.94	3.47	7.6	6.06	64.8	0	2.81917
GSM1032984	5.02333	11.97	5.57	10.33	4.47	8.00667	5.05	45.6	0	2.85209
GSM1032985	5.02667	11.4	4.92	9.48	3.94	8.02667	3.89	61.2	0	2.77194
GSM1032986	5.28667	12.39	7.43	8.7	4.03	7.78667	4.56	56.4	0	3.07255
GSM1032987	5.51667	11.82	7.17	10.125	3.79	8.41333	4.5	56.4	0	2.97302
GSM1032988	4.97333	11.35	5.23	10.52	4.16	7.16	6.73	49.2	1	2.60794
GSM1032989	4.74667	10.77	6.17	8.94	4.33	7.59333	5.3	16.8	1	2.83655
GSM1032990	5.23	11.7	8.82	9.85	3.49	7.43667	4.57	58.8	0	2.80838
GSM1032991	5.43333	10.96	6.28	10.305	3.8	7.84667	6.57	51.6	0	2.79657
GSM1032992	5.3	11.78	9.8	10.515	4.05	8.86333	4.3	57.6	0	3.16791
GSM1032993	5.23	11.92	5.61	11.63	3.96	8.51333	3.7	28.8	1	2.70867
GSM1032994	5.07667	10.76	5.4	9.225	3.35	7.47333	4.59	58.8	0	2.62152
GSM1032995	5.70333	11.09	5.64	8.255	4.09	7.62667	4.34	39.6	0	2.89941
GSM1032996	6.07333	12.32	7.67	8.96	4.09	8.42333	3.57	50.4	0	3.19029
GSM1032997	5.98667	11	7.62	6.56	3.57	8.55667	4.19	43.2	0	3.37613
GSM1032998	5.35667	11.71	6.49	9.845	4.03	7.85667	5.4	52.8	0	2.88967
GSM1032999	5.09	11.35	5.96	9.96	3.29	7.58667	6.63	39.6	1	2.73396
GSM1033000	5.13333	11.89	8.25	7.15	3.93	8.12333	9.25	45.6	0	3.55516
GSM1033001	4.99333	10.92	6.61	10.79	4.15	7.49333	6.17	22.8	1	2.66032
GSM1033002	4.91667	11.55	5.86	10.23	3.84	7.88333	5.24	49.2	0	2.75957
GSM1033003	4.73667	11.17	4.34	8	2.96	7.71333	6.31	8.4	1	2.84294
GSM1033004	4.88667	10.64	5.08	11.145	4.43	7.13667	4.53	0	1	2.37132
GSM1033005	5.20667	11.98	5.56	9.97	3.09	8.15333	4.04	52.8	0	2.7608
GSM1033006	4.95667	10.89	5.91	11.065	3.89	7.80667	5.34	33.6	1	2.59755
GSM1033007	5.10333	11.98	4.51	10.605	5.93	7.63	4.19	50.4	0	2.77274
GSM1033008	4.85667	11.04	4.6	10.335	3.61	8.08	5.03	38.4	0	2.65258
GSM1033009	5.26	11.08	6.77	11.7	3.09	7.97	4.58	46.8	0	2.52047
GSM1033010	5.06333	12.06	6.88	8.655	3.77	8.44	4.29	12	1	3.13161
GSM1033011	5.19333	10.95	5.07	10.16	3.82	8.03333	5.07	14.4	1	2.71456
GSM1033012	4.85333	11.22	5.14	10.14	3.78	8.04333	6.04	16.8	0	2.77552
GSM1033013	5.39333	11.27	4.24	8.93	3.82	7.40333	4.19	43.2	0	2.66309
GSM1033014	5.17667	11.46	4.36	9.7	4	7.57	5.08	50.4	0	2.68345
GSM1033015	5.46333	11.95	5.62	10	3.97	8.40333	5.17	31.2	0	2.96622
GSM1033016	5.35667	11.79	6.23	8.025	3.28	7.55667	4.08	38.4	0	2.89693
GSM1033017	5.16	10.35	4.39	9.11	3.54	7.93667	4.39	50.4	0	2.67197
GSM1033018	5.69	11.75	7.02	9.51	3.79	9.08667	4.29	36	0	3.19244
GSM1033019	5.22667	11.92	6	9.115	4.06	8.09333	6.62	4.8	1	3.08544
GSM1033020	4.98333	10.72	6.21	10.12	3.74	7.64667	7.01	49.2	0	2.74383
GSM1033021	5.34	11.31	4.8	9.97	3.51	8.05667	4.86	34.8	0	2.72736
GSM1033022	6.02667	11.87	6.9	9.235	3.56	8.04	5.05	45.6	0	3.00956
GSM1033023	4.84	11.62	5.96	12.5	3.93	8.11667	5.01	24	0	2.54539
GSM1033024	4.93333	10.38	4.67	8.68	3.95	7.26	4.93	48	0	2.63357
GSM1033025	6.10667	11.35	6.03	9.44	4.92	8.97667	4.06	43.2	0	3.20214
GSM1033026	5.47667	12.05	7.12	8.77	4.19	9.7	4.74	18	1	3.51001
GSM1033027	5.59	12.36	9.73	8.055	3.82	8.94	4.17	36	0	3.51478
GSM1033028	4.98667	11.18	6.67	10.875	4.04	7.72	5.1	43.2	0	2.66627
GSM1033029	4.56333	11.25	6.17	9.12	4.06	7.30333	7.06	38.4	0	2.84008
GSM1033030	5.28333	11.27	5.84	10.195	4.42	8.00333	4.32	24	0	2.79196
GSM1033031	5.66	11.1	6.26	9.49	4.49	7.79667	4.15	27.6	1	2.84873
GSM1033032	5.29333	11.14	6.86	11.71	4.62	8.11667	5.24	32.4	0	2.74045
GSM1033033	4.91	10.59	6.24	9.055	4.41	7.52667	5.2	19.2	0	2.80432
GSM1033034	5.02333	10.67	4.45	10.78	4.29	7.79	5.16	20.4	0	2.56686
GSM1033035	4.86667	10.82	6.32	10.35	3.6	7.59667	4.68	30	0	2.58507
GSM1033036	5.3	11.06	5.62	10.385	4.18	7.69333	4.95	20.4	0	2.67508
GSM1033037	5.35667	11.07	7.24	10.32	3.04	7.89667	7.01	28.8	0	2.81225
GSM1033038	4.81	11.4	4.06	10.295	6.22	8.24333	5.97	28.8	0	2.98734
GSM1033039	5.24	11.78	4.78	9.995	3.47	7.37	6.49	2.4	0	2.67126
GSM1033040	5.34333	11.24	7.6	9.065	4.41	8.64333	12.36	18	1	3.56679
GSM1033041	4.85	11.2	6.24	9.435	4.02	7.64333	4.19	13.2	0	2.74966
GSM1033042	5.07667	11.47	6.16	11.695	4.41	8.12333	4.1	22.8	0	2.65165
GSM1033043	5.12667	11.44	6.65	7.655	3.34	7.58	9.05	25.2	0	3.17959
GSM1033044	4.87667	10.84	4.54	8.335	3.49	6.95333	7.15	22.8	1	2.69887
GSM1033045	5.15333	10.86	4.78	10.305	3.72	7.47333	4.93	25.2	0	2.52251
GSM1033046	4.89667	10.39	4.94	10.175	4.24	7.40667	6.16	24	0	2.58828
GSM1033047	4.97333	11.14	5.02	9.535	4.37	7.79	9.48	14.4	0	3.00496
GSM1033048	4.83	10.34	5.74	8.415	3.76	7.06667	4.87	19.2	0	2.64478
GSM1033049	5.00333	11.23	4.04	8.585	3.2	7.10333	8.03	14.4	1	2.73451
GSM1033050	5.86667	10.35	7.56	9.295	3.7	7.27333	4.78	20.4	0	2.71484
GSM1033051	5.02667	9.95	4.66	8.17	3.63	7.37333	5.66	14.4	0	2.69553
GSM1033052	4.75	10.51	5.91	10.34	3.88	7.79	5.5	1.2	0	2.647
GSM1033053	4.81	11.79	5.86	9.065	4.09	7.67667	3.25	4.8	0	2.79207
GSM1033054	4.73667	10.88	4.7	10.055	4.36	7.77667	6.51	19.2	0	2.74282
GSM1033055	5.19667	10.63	6.3	9.465	3.92	7.22667	4.56	18	0	2.62432
GSM1033056	4.71333	10.83	5.85	9.78	4.49	7.26	5.77	20.4	0	2.68057
