# Supplementary material for: Transcriptomic analysis reveals a WNT signaling pathway-based gene signature prognostic for non-small cell carcinoma
Source: Aging (Albany NY). 2020 Oct 7;12(19):19159–72. doi: 10.18632/aging.103724 (PMC7732286; doi:10.18632/aging.103724)
Supplement: Supplementary Table 5 [file aging-12-103724-s006..xlsx]

## Sheet: data_5__exp_profile
sample	PPARD	PPP2R1A	FOSL1	CCND2	CAMK2A	CSNK1E	SFRP1	OS	OS_IND	riskscore
GSM1213669	5.52415	7.76912	5.34784	6.15986	4.4202	8.24167	3.80207	4.11	1	2.99877
GSM1213670	5.47338	6.4996	4.96643	5.11117	4.3208	6.69028	3.49645	7.52	0	2.5997
GSM1213671	5.14681	7.46688	4.16748	4.85629	4.29182	6.58175	3.7054	7.32	0	2.64045
GSM1213672	5.61445	7.61151	4.67745	5.5718	4.38268	7.53556	3.78819	6.84	0	2.85313
GSM1213673	5.40834	7.77456	5.82733	5.62814	4.31951	7.88021	3.85501	1.91	1	2.98942
GSM1213674	5.31913	7.21747	5.18105	5.61074	4.45518	7.34075	4.19295	7.03	0	2.80752
GSM1213675	5.58756	8.48758	6.63683	6.3665	4.33883	7.57422	5.16065	6.85	0	3.00227
GSM1213676	5.42213	7.25379	4.64139	5.11793	4.32771	7.15985	3.42431	4.33	1	2.75434
GSM1213677	5.66882	7.93351	5.44654	5.67496	4.42565	8.41371	5.11185	6.22	0	3.18908
GSM1213678	5.58953	7.45298	4.96949	5.33234	4.42937	6.90052	3.6912	4.08	1	2.72957
GSM1213679	5.06569	7.28776	4.85357	5.7894	4.43941	7.23882	5.39769	6.31	0	2.79805
GSM1213680	6.40806	7.46135	8.46465	5.2928	4.12745	7.78775	3.59302	5.99	0	3.12619
GSM1213681	5.93306	8.20352	5.77	5.3412	4.66044	8.25857	4.49324	5.32	0	3.23433
GSM1213682	5.44284	7.13437	5.6806	5.28031	4.35709	6.9759	3.69869	5.56	0	2.74995
GSM1213683	5.81825	7.47907	4.38555	5.18632	4.26844	7.33612	3.48376	5.02	0	2.80906
GSM1213684	5.43456	8.153	5.3953	6.11667	4.38381	7.42568	5.88812	3.47	0	2.93926
GSM1213685	5.32637	7.37341	4.40933	4.91801	4.28501	6.9065	4.31187	6.76	0	2.75204
GSM1213686	5.53447	8.00015	5.13413	5.05571	4.17874	7.73492	4.07903	2.84	1	3.01158
GSM1213687	5.36663	7.62885	4.43009	5.24283	4.23568	7.51633	4.04118	6.46	0	2.86554
GSM1213688	5.41245	7.48376	4.56648	4.82397	4.43432	7.08477	3.90299	5.76	0	2.82092
GSM1213689	5.43391	7.67601	4.37198	5.45488	4.46183	7.0131	4.16835	4.95	0	2.75053
GSM1213690	5.40046	6.95122	4.63534	4.76591	4.40855	7.12133	3.65176	5.12	0	2.77941
GSM1213691	5.69809	7.56777	5.09196	5.42457	4.35157	6.86552	4.56741	6.39	0	2.76665
GSM1213692	5.21632	7.34612	4.36262	5.07951	4.21953	7.34871	3.43524	5.74	1	2.77974
GSM1213693	5.6423	7.81468	5.62159	4.25795	5.08684	7.35694	3.85923	1.1	1	3.10459
GSM1213694	5.21532	7.46439	4.83311	5.4383	4.0834	6.69743	3.66678	6.69	0	2.6127
GSM1213695	5.53012	7.38403	5.62202	6.45962	4.26111	7.97555	5.86628	5.84	0	2.96693
GSM1213696	5.47328	7.41031	4.57771	5.3983	4.31482	7.52489	4.49389	5.18	0	2.87183
GSM1213697	5.28493	7.41875	5.13415	5.69975	4.49139	7.55897	4.41978	6.37	0	2.87697
GSM1213698	5.47275	7.35892	5.10772	6.72744	4.3424	7.68481	4.28612	5.63	1	2.76385
GSM1213699	4.98588	7.57476	3.92996	5.49545	4.14695	6.9385	3.77125	1.88	1	2.62868
GSM1213700	5.5979	7.10944	5.09448	5.48515	4.40944	7.13511	3.51449	4.03	1	2.73406
GSM1213701	5.27354	7.45297	6.19728	5.30072	4.25457	7.62496	3.99809	5.22	1	2.95431
GSM1213702	5.16003	8.24403	5.24448	4.66542	4.519	6.66173	4.62817	2.93	1	2.87065
GSM1213703	5.26229	7.6226	5.21164	6.27487	4.11757	6.85447	3.99777	5.96	1	2.60317
GSM1213704	5.54444	7.45776	4.9511	6.50807	4.23172	7.67694	4.43237	5.54	0	2.78906
GSM1213705	5.23449	7.86174	6.30701	6.78231	4.61846	7.8171	4.56232	0.48	1	2.92143
GSM1213706	5.36699	7.47321	5.50641	6.24112	4.24457	7.88185	3.9038	7.5	0	2.86734
GSM1213707	5.5488	7.66054	5.27141	5.71828	4.46669	7.84587	4.43095	5.41	0	2.98064
GSM1213708	5.75866	7.67966	7.49264	5.02084	4.41528	8.01946	3.87106	6.11	0	3.19694
GSM1213709	5.33468	7.7947	6.05356	6.22797	4.25144	8.31753	3.53081	5.2	0	3.00926
GSM1213710	5.4312	7.73125	7.33322	5.64177	4.40804	8.51389	3.96911	0.33	0	3.22677
GSM1213711	5.6786	7.8278	7.43689	5.42143	4.74754	7.74523	4.33162	4.62	0	3.14274
GSM1213712	5.23616	8.10976	5.34676	6.82396	4.4029	7.65734	4.7682	6.58	0	2.84101
GSM1213714	5.63706	7.97061	7.6064	5.91622	4.20782	7.3655	3.6796	6.15	0	2.92836
GSM1213715	6.03602	8.6203	5.93765	4.94938	4.40555	7.41431	3.7473	7.36	0	3.06731
GSM1213716	5.61924	7.89583	5.0588	5.52081	4.58882	7.83537	3.64803	4.37	1	2.98716
GSM1213717	6.17897	8.00137	6.55058	5.20786	4.70734	8.37227	3.8541	4.91	1	3.28321
GSM1213718	5.19572	7.79584	4.96344	6.40573	4.38772	6.68406	3.522	4.95	0	2.54756
GSM1213719	5.76822	8.4066	4.45045	5.02825	4.57713	7.48862	4.53887	0.93	1	3.02587
GSM1213720	5.46105	8.10795	5.12628	5.06926	4.46934	6.96561	3.78437	6.37	0	2.84367
GSM1213722	5.60278	8.37162	7.19845	6.63714	4.8197	7.63819	6.05531	1.25	1	3.0928
GSM1213723	6.14348	8.3122	7.07313	6.34426	4.7603	8.42411	3.96798	2.61	1	3.21994
GSM1213724	5.72079	7.25647	4.52553	4.35356	4.24758	7.63107	3.57393	6.28	0	2.96699
GSM1213726	5.78051	7.8059	4.78596	5.82156	4.38616	7.12786	3.93211	6.56	0	2.76177
GSM1213727	5.82172	7.90596	5.87596	6.17092	4.70085	7.3938	4.08657	5.79	1	2.8854
GSM1213728	5.61617	7.74748	3.97594	5.28347	4.42523	7.21649	4.48619	5.39	0	2.82627
GSM1213729	5.42639	8.37957	6.77977	6.66656	4.65837	8.01271	3.82894	2.42	1	3.02615
GSM1213730	6.03185	8.63558	8.22626	6.0666	4.67597	8.3175	3.87526	3.21	1	3.29656
GSM1213731	5.29572	7.86328	6.62811	6.36299	4.15927	7.56865	4.81527	5.81	0	2.90135
GSM1213732	5.27091	8.34273	5.81786	6.84266	4.45072	7.6262	6.58252	7.56	0	2.9704
GSM1213733	6.14276	8.20284	5.20187	5.14779	4.94746	8.47399	3.9173	3.48	1	3.28797
GSM1213734	5.36749	8.05498	5.2008	5.6362	4.60466	7.83569	4.57259	5.16	0	3.03031
GSM1213735	5.11866	8.0362	4.24763	5.09571	4.39532	7.51059	3.84418	6.06	0	2.90206
GSM1213736	5.55693	8.29382	5.72486	5.65921	4.41033	8.33522	3.84041	0.91	1	3.14801
GSM1213737	5.25451	7.69366	5.80789	5.62609	4.80697	7.23608	3.90693	2.95	0	2.86869
GSM1213738	5.31159	7.5755	4.85499	5.69666	4.40751	7.53373	3.91873	3.85	1	2.83921
GSM1213739	5.57581	7.44352	5.25074	5.59382	4.70221	7.53456	3.72131	0.12	0	2.88957
GSM1213740	5.52458	8.09203	4.84541	5.74918	4.38779	7.13014	4.34953	5.84	0	2.80828
GSM1213741	5.12258	7.54215	4.63999	5.51538	4.1685	7.09939	3.89645	6.35	1	2.71191
GSM1213742	5.56807	7.77337	5.5817	5.4284	4.39199	7.42831	3.80804	5.26	1	2.90406
GSM1213743	5.63451	7.8963	5.25294	7.02127	4.84173	7.61804	4.20122	5.03	0	2.81468
GSM1213744	5.65875	8.34288	5.92245	7.27095	4.40914	8.52682	4.22668	5.04	0	3.03625
GSM1213745	6.02227	7.40911	6.90276	5.6473	4.268	7.3229	3.54356	4.76	1	2.8827
GSM1213746	5.49426	8.09975	4.94928	5.79562	4.73453	7.0549	3.95642	5.17	0	2.80209
GSM1213747	5.21254	7.32626	4.03007	5.58411	4.27116	7.60796	4.01643	4.13	0	2.79564
GSM1213748	5.36259	7.86174	5.33054	6.07566	4.33529	8.26424	4.02143	5.08	0	3.0174
GSM1213749	5.20207	7.90115	5.08969	6.22433	4.34571	7.39948	3.97598	3.2	1	2.77515
GSM1213750	6.11936	7.58504	6.01063	5.21857	4.74752	7.33333	3.72093	1.03	1	2.96468
GSM1213751	5.28761	7.62166	4.86343	5.89382	4.45819	7.52027	4.75148	4.91	0	2.86126
GSM1213752	5.38463	7.83761	4.98218	5.49912	4.7323	6.91918	3.79245	0.97	1	2.77173
GSM1213753	5.48377	7.21315	4.35435	4.63034	4.19632	7.6105	3.67381	3.09	1	2.9062
GSM1213754	5.70284	8.01727	5.37345	5.85674	4.30586	7.6316	3.80749	2.02	1	2.90899
GSM1213756	5.15625	7.447	4.21107	6.82835	4.25903	7.523	4.33346	5.27	0	2.65615
GSM1213757	5.54029	7.40841	6.44254	5.5044	4.30643	6.9897	4.14039	5.75	0	2.80921
GSM1213758	5.08527	7.70464	4.46594	6.254	4.60333	7.30478	5.57422	5.51	0	2.79846
GSM1213759	5.96661	8.49124	6.34475	4.30514	4.29389	7.31116	3.5204	5.49	0	3.10554
GSM1213760	6.08777	8.31716	4.36015	4.88164	4.47211	7.62301	4.01927	4.57	0	3.04194
GSM1213761	5.34692	8.21178	4.80322	6.21433	4.44756	7.33158	4.48124	4.93	0	2.81279
GSM1213762	5.7992	8.10506	7.49482	5.75848	4.77185	7.97496	4.00268	0.86	1	3.1748
GSM1213763	5.43074	7.58055	4.34584	6.0678	4.35128	7.20241	4.06238	1.95	1	2.69657
GSM1213764	5.73979	7.76069	4.83846	5.76851	4.37958	8.01553	4.52926	7.75	0	3.00689
GSM1213765	5.89185	7.28833	4.17171	4.05059	4.2972	7.65527	3.55959	2.7	1	3.0056
GSM1213766	5.5135	8.21413	6.42428	6.13016	4.56923	7.92989	3.79426	3.48	1	3.03292
GSM1213767	5.63411	8.03442	5.97301	6.34962	4.60216	7.41004	4.2974	3.64	1	2.87669
GSM1213768	5.41532	8.23183	4.26447	5.85133	4.92227	7.66501	4.41888	4.34	0	2.95525
GSM1213769	5.5202	7.86764	4.71266	5.87858	4.32153	7.28814	4.72102	5.29	0	2.81661
GSM1213770	5.18479	7.63254	5.02033	5.64139	4.4896	8.09284	4.58209	2.11	1	3.02809
GSM1213771	5.47741	8.10402	6.80708	7.42884	4.388	8.32964	6.01026	7.38	0	3.07234
GSM1213772	5.36327	8.0893	5.37553	5.90529	4.36554	7.74124	4.09878	7.44	0	2.94101
GSM1213773	5.54463	7.53366	4.83695	5.78524	4.45684	8.08962	3.94365	4.79	1	2.97309
GSM1213774	5.39826	7.58103	5.29006	5.97399	4.38991	6.91846	4.11218	3.01	1	2.69217
GSM1213775	5.57521	8.01013	3.79768	7.45465	4.3395	6.81248	3.58709	3.14	1	2.42584
GSM1213777	5.06317	8.31087	4.08543	5.30459	4.39375	7.82956	3.70678	5.45	0	2.9592
GSM1213778	5.37436	7.87586	5.46655	6.71281	4.32656	8.55385	4.45928	5.67	0	3.03904
GSM1213779	5.3245	7.5157	3.88535	5.53444	4.51206	7.14844	3.67891	3.11	0	2.71094
GSM1213780	5.55904	7.97135	4.78929	5.49373	4.31596	6.87839	3.89339	0.65	1	2.73801
GSM1213781	5.46655	7.96983	5.05052	5.72152	4.67532	7.07414	4.50775	1.8	1	2.83019
GSM1213782	5.14859	7.54992	4.67421	6.43084	4.21704	6.65684	3.62014	3.21	0	2.48935
GSM1213783	6.00508	7.98583	8.45266	5.76561	4.81516	7.46456	3.96292	0.6	1	3.1006
GSM1213784	5.5862	8.35898	5.1049	5.25237	4.21862	7.46717	3.87747	5.2	0	2.94872
GSM1213785	5.3096	7.97151	4.7328	5.12728	4.73378	7.49439	4.48939	3.89	1	2.98482
GSM1213786	5.94004	9.24079	5.91831	6.62413	4.96456	8.77053	5.90108	5.96	0	3.39582
GSM1213787	5.5065	7.79938	4.43455	6.14417	4.15618	7.51219	4.69127	3.43	0	2.80087
GSM1213788	5.61035	7.84412	7.25308	6.01477	4.44479	7.03145	4.39258	1.49	1	2.86381
GSM1213789	5.65651	8.41772	5.67404	5.59534	4.33598	7.29364	4.84634	1.83	1	2.96105
GSM1213790	5.62585	8.55173	6.31095	6.2261	4.51952	7.80078	4.06363	5.18	0	3.02695
GSM1213791	5.52769	8.61184	5.92566	7.07771	4.25332	8.00898	4.9996	5.18	1	2.97665
GSM1213792	5.89277	8.20354	5.05707	5.67087	4.34009	7.38503	3.7754	2.92	1	2.88209
GSM1213793	5.37846	8.08836	5.56521	6.91552	4.24228	6.668	3.61222	2.69	0	2.53605
GSM1213794	5.11212	7.41908	4.1465	5.23657	4.43373	6.62554	3.44649	4.99	0	2.59871
GSM1213795	5.30866	7.98323	5.588	6.0049	4.39172	7.07525	4.85134	6.67	0	2.80818
GSM1213796	5.52618	7.94318	6.50651	5.33708	4.16757	7.71191	4.28548	5.6	1	3.04512
GSM1213797	5.05435	7.50958	5.69771	5.22376	4.1549	7.14057	4.3998	5.84	0	2.82829
GSM1213798	5.4466	8.06941	6.33184	5.5945	4.40193	8.20153	4.67322	10.88	0	3.17082
GSM1213800	5.78207	7.61665	5.11871	5.65869	4.26904	7.55473	3.76107	0.51	0	2.86517
GSM1213801	5.71586	7.62936	6.08914	6.2527	4.51116	7.55499	3.81878	4.04	1	2.86587
GSM1213802	5.86583	8.08817	6.99974	5.14057	4.45281	7.75024	4.40807	4.73	0	3.16252
GSM1213803	6.11998	8.55359	6.94716	5.84956	4.35653	8.00534	4.18719	1.54	0	3.16595
GSM1213804	5.70827	8.51063	4.59785	5.10122	4.42445	8.0544	3.98351	7.83	0	3.1248
GSM1213805	5.39063	7.67846	6.0977	6.6887	4.59124	7.78937	3.67401	6.02	0	2.86024
GSM1213806	5.80649	8.09872	6.49869	5.66977	4.54048	7.77076	3.54114	1.71	0	3.04183
GSM1213807	5.48939	8.53707	5.14236	5.52901	4.80752	7.26923	3.75384	0.71	0	2.92941
GSM1213808	5.00633	7.24879	4.0288	4.84626	4.34717	7.64298	3.58873	5	0	2.86383
GSM1213809	5.15017	7.34931	4.19002	5.53476	4.23865	6.19326	4.07047	1.27	0	2.46948
GSM1213810	5.39262	7.47289	4.37857	4.52446	4.14522	6.84258	3.37443	0.15	0	2.73489
GSM1213811	5.40235	7.8422	5.60464	6.24284	4.20658	6.99765	3.68577	1.37	0	2.67884
GSM1213812	5.61515	8.16877	7.15284	6.59811	4.40971	8.26548	3.88384	0.8	1	3.08351
GSM1213813	6.04743	8.23875	8.61289	4.80294	4.78976	7.52399	7.88634	0.95	1	3.45415
GSM1213814	5.59801	8.01732	4.96907	5.91488	4.40171	7.17457	3.79931	5.1	0	2.77602
GSM1213815	5.737	8.06625	7.23088	5.96587	4.6497	8.72137	3.72274	4.76	0	3.28415
GSM1213816	6.6581	8.60546	6.98102	5.73512	4.88006	7.52359	3.80815	0.09	0	3.12355
GSM1213817	6.10773	8.06792	4.95834	5.55889	4.10632	7.65841	3.48598	3.46	1	2.91781
GSM1213818	5.38415	8.01491	3.84716	5.40445	4.41937	7.81339	3.78556	3.38	0	2.92598
GSM1213819	5.591	8.2229	5.90558	6.71583	4.50314	7.87725	5.70766	1.52	1	3.01557
GSM1213820	6.22088	8.70047	4.59275	4.93374	4.37845	8.02036	3.80324	1.91	1	3.16168
GSM1213821	5.5668	8.33792	6.11037	5.89555	4.625	7.69684	4.75441	11.39	0	3.05506
GSM1213822	5.29871	8.10723	5.11655	5.59121	4.48173	7.34081	3.88248	12.04	0	2.86889
GSM1213824	5.21886	6.80965	4.48463	4.68115	4.21378	7.38024	3.26032	1.59	1	2.78683
GSM1213825	5.23235	7.89375	4.84782	5.68262	4.41237	7.62851	3.8674	7.38	0	2.88497
GSM1213826	5.36603	8.44993	6.88525	5.0062	4.57172	8.37955	3.71973	0.57	1	3.31043
GSM1213827	5.38128	8.08469	5.90338	4.94068	4.65065	7.56101	3.5144	4.17	0	3.0393
GSM1213828	6.13543	8.30006	6.59125	5.44363	4.75706	7.16855	3.48469	2.49	1	2.97817
GSM1213829	5.33056	7.75155	7.29315	6.71081	4.34676	7.40768	3.73128	1.37	0	2.81009
GSM1213830	5.43825	7.51748	6.74503	7.985	4.01911	7.62773	5.71761	8.34	0	2.73307
GSM1213831	5.53365	8.2598	4.72261	4.8855	4.26981	7.97335	3.97637	5.13	0	3.09413
GSM1213833	5.23753	7.75165	4.07321	5.68592	4.14986	7.57733	3.72628	0.56	1	2.78994
GSM1213834	6.104	7.81544	5.53577	6.0856	4.29883	7.17293	3.6825	2.71	0	2.77266
GSM1213835	5.6692	8.59842	4.78924	5.8745	4.59203	7.38729	6.36884	1.97	1	3.02001
GSM1213836	6.11177	8.28007	5.22551	4.73994	5.01231	7.24144	4.13206	1.26	0	3.06496
GSM1213837	5.56868	7.9048	6.31903	5.90504	4.12669	8.05574	5.13979	7.61	1	3.08622
GSM1213838	5.20655	7.60867	4.14561	5.54582	4.81132	6.66716	3.95047	3.85	0	2.65144
GSM1213839	5.47359	7.16322	6.77314	5.29429	4.32713	8.01998	4.36976	1.35	1	3.08776
GSM1213840	5.86748	8.15296	4.49522	5.41175	4.06829	8.10533	4.03434	1.23	1	3.03989
GSM1213841	6.93569	8.75117	9.64046	5.41154	4.84655	8.37401	4.00669	6.47	1	3.53173
GSM1213843	5.70534	8.12399	7.10808	5.96085	4.27635	8.17135	5.08891	7.74	1	3.18296
GSM1213844	5.93987	8.06211	5.19272	5.83466	4.4913	7.35406	3.61271	4.54	0	2.85766
GSM1213845	5.74654	8.15997	5.88264	5.49046	5.1026	8.39166	4.18484	1.2	1	3.26805
GSM1213846	5.75444	7.47544	4.92215	5.69374	4.31532	7.09507	3.7114	0.31	1	2.72944
GSM1213847	5.48459	7.62583	3.76957	5.54139	4.41549	6.9915	3.78277	8.26	0	2.67905
GSM1213848	5.40647	7.99712	6.15636	6.1216	4.59485	7.28177	6.40305	0.1	1	2.97307
GSM1213849	5.52769	7.63499	4.57259	6.16197	4.44878	7.8723	5.38895	4.16	0	2.94053
